# Supplementary material
Source: publisher figshare collection journal article supplement (https://plos.figshare.com/articles/dataset/_/1022100)
Supplement: Supplementary file [file 1]

Table S1. Gene names and primer sequences (5'-3') used for real-time PCR

| Genbank Acc. N° | Gene Product                                              | Gene Symbol   | Forward primer            | Reverse primer            |
|-----------------|-----------------------------------------------------------|---------------|---------------------------|---------------------------|
| NM_178095.2     | ATP-binding cassette, sub-family A (ABC1)                 | ABCA1         | GGTAGTGTGGCCACTTTTCGT     | TCTGGGCCTGATGAAAAATC      |
| NM_022193.1     | Acetyl-coenzyme A carboxylase alpha                       | ACC1          | TTGGCTGAGCGACTGGGCAC      | TCTCCTGCATCCGGCCTGGG      |
| NM_053922.1     | Acetyl-Coenzyme A carboxylase beta                        | ACC2          | CGGCTGCTGCTGGAAGCCAT      | TGACCATGGCAGCACCGAC       |
| NM_017340       | Acyl CoA oxidase 1, peroxisomal (Palmitoyl-CoA oxidase)   | AOX           | TCGGGCAAGTGAGGCGCATT      | AGCAACAGCATTGGGGCGGA      |
| NM_013112       | Apolipoprotein A-II                                       | Apoa2         | GGCAAGGATTTGATGGAGAA      | ACAAGCAGAAAGTCGGGAGA      |
| NM_019287       | Apolipoprotein B                                          | ApoB          | CAGGGCACCAACCAGATAGT      | GAGGGATCCAGAAAGAAGGG      |
| NM_031804       | Cytokine inducible SH2-containing protein                 | CIS           | CGTACAGGAGGCCACGTAAT      | CCACCCCAGCTACCTGTTTA      |
| NM_031559.1     | Carnitine palmitoyltransferase 1a                         | CPT1          | GCAAGAGGAGTGAGACCCTG      | TTAGCCCATTGGATGCTTTC      |
| NM_001004085.2  | carnitine acetyltransferase                               | CRAT          | CCCAAAGTGCCGGAGCAGCA      | GTGCCGGTCAAAGGCCTCCC      |
| NM_178847       | Cytochrome P450, family 27, subfamily a, polypeptide 1    | Cyp27a1       | ACCTGCGCCTCTACCCTGT       | GCAATCCTGCGACCCAGGCA      |
| NM_019184.2     | Cytochrome P450, family 2, subfamily c, polypeptide 11    | Cyp2c11       | TCGGATCCAGTGAACATCAA      | ACTGCATGGGAATGTCACAA      |
| NM_031572.1     | Cytochrome P450, family 2, subfamily c, polypeptide 12    | Cyp2c12       | ACCAAAGGCTCACCTGTGATCC    | CCTGAAATGCAGGAGTGCTCACA   |
| NM_138514       | Cytochrome P450, family 2, subfamily c, polypeptide 77    | Cyp2c13       | CCTTTCTCAGCAGGAAAACGGATGT | GCGCATCTGGAAAGTGGGAGG     |
| NM_017158.1     | Cytochrome P450, family 2, subfamily c, polypeptide 7     | Cyp2c7        | CATGGATCTCATTGGTGCAG      | GGTTGGTCGGGACAAAGTTA      |
| NM_012942.1     | Cytochrome P450, family 7, subfamily a, polypeptide 1     | Cyp7a1        | CCTCCTGGCCTTCCTAAATC      | AGACCTGGTCCCTCACACAC      |
| NM_031241       | Cytochrome P450, family 8, subfamily b, polypeptide 1     | Cyp8b1        | AGGGAATGCGGGCCAAGCAC      | CCAGCATGGCCCGTTGAGG       |
| NW_047693       | Fatty acid-Binding Protein                                | FACBP         | ATGTCACCCAGTGTCTGTT       | GAGGAGTGCGAACTGGAGAC      |
| NM_031344       | Fatty acid desaturase 2                                   | Fads2         | ATCTGCCCTACAACCACCAG      | AGTTGAGGAAAACCAGGGCT      |
| NM_017332       | Fatty acid Synthase                                       | FAS           | TCGAGACACATCGTTTGAGC      | TCAAAAAGTGCATCCAGCAG      |
| NM_031561       | Thrombospondin receptor                                   | FAT/CD36      | TCTCTCCTCGGATGGCTAGCTGA   | TGGCCTGGTTCAACTAATTCATGCA |
| NM_130752.1     | Fibroblast Growth Factor 21                               | FGF21         | CTTCTGCTGGGGGTGTGCG       | CCAGGAGACTTTCTGGACTGCGG   |
| NM_012597.2     | Hepatic triacylglycerol lipase precursor (Hepatic lipase) | HL            | CCACGGGTGGTGGTGGATG       | CTCCTGGCCCACAACACGGG      |
| NM_013134.2     | 3-Hydroxy-3-methylglutaryl-CoA reductase                  | HMGCR         | TGTGGCCAGGATGCAGCACAG     | TGGTCCCACCACCCACGGTT      |
| NM_017268.1     | 3-Hydroxy-3-methylglutaryl-CoA synthase 1                 | HMGCS         | CTATGGGGGCACAGCCGCAG      | TGTCCACGAAGCCCTCGGT       |
| NM_178866       | Insulin-Like Growth Factor 1                              | IGF-1         | GTTCCGATGTTTTGCAGGTT      | TCTGAGGAGGCTGGAGATGT      |
| NM_012588       | Insulin-like growth factor binding protein 3              | IGFBP-3       | TACCAGGGTCTCCAACAAGG      | GGCCCAGCAGAAATATCAAA      |
| NM_022392.1     | Insulin induced gene 1                                    | INSIG1        | ATATCCGTTCTTGCTCCCT       | TCCTTGCTCCACTTGCTAT       |
| NM_012592       | Isovaleryl coenzyme A dehydrogenase                       | Ivd           | TGGACCACACCATTCCTAT       | CCATCCAGGGCTACTTGTGT      |
| NM_175762       | Low density lipoprotein receptor                          | LDLR          | TTCTTCAGGTTGGGGATCAG      | CAGCTCTGTGTGAACCTGGA      |
| NM_012738       | Fatty acid-binding protein, liver 1                       | L-FAB         | TGAAGCGATGGGTCTGCCTGA     | CGCACTCCTCCCCAAGGTGA      |
| NM_198780       | Phosphoenolpyruvate carboxykinase 1                       | Pck1          | GGAATTCTGGGAGAAGGAGG      | CCCTAGCCTGTTCTCTGTGC      |
| NM_013196.1     | Peroxisome proliferator activated receptor alpha          | PPAR $\alpha$ | TCACACAATGCAATCCGTTT      | ACAAGCGTCTTCTCAGCCAT      |
| NM_017101       | Peptidylprolyl isomerase A, Cyclophilin A.                | Ppia          | GGTGACTTCACACGCCATAA      | AGCCACTCAGTCTTGCCAGT      |
| NM_058208       | Suppressor of cytokine signaling 2                        | SOCS-2        | AATGCTGAGTCGGCAGAAGT      | GACGGGAAATTCAGATTGGA      |
| NM_053565       | Suppressor of cytokine signaling 3                        | SOCS-3        | CGTTGACAGTCTTCCGACAA      | CCTTTGAGGTTGAGGAGCAG      |
| NM_001109274    | Suppressor of cytokine signaling 5                        | SOCS-5        | CGCAGTAGGCTCTCGCTCTTCTAA  | CCTCGCCAGACTGACGCTT       |
