# Supplementary material
Source: publisher figshare collection journal article supplement (https://plos.figshare.com/articles/dataset/_/1022100)
Supplement: Supplementary file [file 1]

| ENSMBL              | RefSeq/Unigene      | Symbol     | Gene description                                                                       | R   |       |       | q(%) |
|---------------------|---------------------|------------|----------------------------------------------------------------------------------------|-----|-------|-------|------|
|                     |                     |            |                                                                                        | GH  | E2    | E2-GH |      |
| ENSRNOG00000001056  | NM_001013121        | Snapc2     | small nuclear RNA activating complex, polypeptide 2                                    | 9,9 | -16,7 | 9,3   | 0,0  |
| ENSRNOG000000006400 | NP_001012152.1      | TBC1D14    | TBC1 domain family, member 14                                                          | 9,8 | -3,3  | -4,1  | 0,0  |
| ENSRNOG000000023830 | NM_138539           | Dnase2a    | deoxyribonuclease II alpha                                                             | 8,9 | -2,8  | -3,8  | 1,0  |
| ENSRNOG000000022707 | NM_001109514.1      | Pmp2       | peripheral myelin protein 2                                                            | 8,6 | -2,8  | -3,7  | 1,0  |
| ENSRNOG00000014313  | ENSRNOG00000014313  | Myb        | similar to Myb proto-oncogene protein (C-myb)                                          | 8,5 | -2,7  | -3,7  | 1,6  |
| ENSRNOG000000026497 | NM_001012207.1      | Pigc       | phosphatidylinositol glycan anchor biosynthesis, class C                               | 8,4 | -2,8  | -3,5  | 0,6  |
| ENSRNOG000000024809 | NP_001020190.1      | mettl11a   | methyltransferase like 11A                                                             | 7,4 | -2,2  | -3,3  | 4,5  |
| ENSRNOG00000017883  | XP_216007.3         | CAMSAP1    | calmodulin regulated spectrin-associated protein 1                                     | 6,8 | -2,1  | -3,1  | 5,1  |
| ENSRNOG00000017967  | XP_341552.2         | ASB13      | ankyrin repeat and SOCS box-containing 13                                              | 6,8 | -2,1  | -3,0  | 5,1  |
| ENSRNOG00000014549  | XP_227201.3         | SGEF       | Src homology 3 domain-containing guanine nucleotide exchange factor                    | 6,5 | -2,2  | -2,8  | 0,6  |
| ENSRNOG00000013441  | NM_012767           | GNRH1      | gonadotropin-releasing hormone 1 (luteinizing-releasing hormone)                       | 6,4 | -2,1  | -2,7  | 0,6  |
| ENSRNOG000000024025 | NP_001028240.1      | EDC4       | enhancer of mRNA decapping 4                                                           | 6,2 | -2,0  | -2,6  | 1,7  |
| ENSRNOG000000002985 | NM_138922           | nos1ap     | nitric oxide synthase 1 (neuronal) adaptor protein                                     | 6,1 | -1,8  | -2,7  | 5,1  |
| ENSRNOG000000025944 | ENSRNOG000000025944 | RB26       | Ras-related protein Rab-26                                                             | 5,8 | -1,8  | -2,5  | 2,6  |
| ENSRNOG000000028544 | XP_221795.1         | Dppa1-ps1  | developmental pluripotency associated 1, pseudogene 1                                  | 5,7 | -1,9  | -2,4  | 0,6  |
| ENSRNOG000000021270 | XP_230548.3         | TRMT6      | similar to CGI-09 protein; tRNA methyltransferase 6 homolog (S. cerevisiae)            | 5,4 | -1,8  | -2,3  | 1,4  |
| ENSRNOG00000018662  | NM_012816           | AMACR      | alpha-methylacyl-CoA racemase                                                          | 5,4 | -1,9  | -2,1  | 0,0  |
| ENSRNOG000000020817 | NM_012693           | Cyp2a1     | cytochrome P450 2A1 (hepatic steroid hydroxylase IIA1)                                 | 5,0 | -2,5  | -1,2  | 0,0  |
| ENSRNOG000000021233 | XP_230604.1         | itpa       | inosine triphosphatase (nucleoside triphosphate pyrophosphatase)                       | 5,0 | -1,6  | -2,1  | 1,7  |
| ENSRNOG00000019470  | NM_032082           | hao2       | hydroxyacid oxidase 2 (long chain)                                                     | 4,6 | -4,1  | 0,6   | 0,0  |
| ENSRNOG00000013736  | NM_057146           | C9         | complement component 9                                                                 | 4,5 | -2,0  | -1,4  | 0,0  |
| ENSRNOG000000004549 | NP_001005873.1      | DHX40      | DEAH (Asp-Glu-Ala-His) box polypeptide 40                                              | 4,5 | 5,2   | -8,6  | 0,6  |
| ENSRNOG00000010298  | Q9R1S4              | Xbp1       | X-box binding protein 1                                                                | 4,5 | -3,8  | 0,5   | 0,0  |
| ENSRNOG000000007036 | NM_012775           | tgfbr1     | transforming growth factor, beta receptor 1                                            | 4,5 | -1,4  | -1,9  | 2,6  |
| ENSRNOG00000010337  | NM_031746.1         | Slc13A2    | solute carrier family 13 (sodium-dependent dicarboxylate transporter), member 2        | 4,4 | -4,7  | 1,4   | 0,0  |
| ENSRNOG000000026974 | NP_001014178.1      | Dbndd1     | dysbindin (dystrobrevin binding protein 1) domain containing 1                         | 4,3 | -1,4  | -1,8  | 2,1  |
| ENSRNOG000000024990 | XP_575157.1         | Ppp1r1c    | protein phosphatase 1, regulatory (inhibitor) subunit 1C                               | 4,2 | -1,4  | -1,8  | 2,1  |
| ENSRNOG000000009505 | XP_342936.2         | CD164L2    | CD164 sialomucin-like 2                                                                | 4,2 | -1,4  | -1,7  | 0,6  |
| ENSRNOG000000003566 | NM_001009626        | Apoh       | apolipoprotein H (beta-2-glycoprotein I) (ApoH)                                        | 4,1 | -6,9  | 3,8   | 0,6  |
| ENSRNOG000000020950 | NM_001100739.1      | Syvn1      | synovial apoptosis inhibitor 1, synoviolin                                             | 4,1 | -0,2  | -2,9  | 0,0  |
| ENSRNOG00000016151  | XP_237094.2         | Ankrd23    | ankyrin repeat domain 23                                                               | 4,0 | -1,3  | -1,7  | 1,4  |
| ENSRNOG00000018952  | Q5CCT7_RAT          | SEMA3G     | sema domain, immunoglobulin domain (Ig), short basic domain, secreted, (semaphorin) 3G | 3,9 | -1,3  | -1,7  | 2,9  |
| ENSRNOG00000010275  | XP_342602.2         | RGD1311940 | similar to bA305P22.2.1 (novel protein, isoform 1)                                     | 3,7 | -1,2  | -1,5  | 1,0  |
| ENSRNOG000000007395 | NP_058996.1         | baat       | bile acid Co A: amino acid N-acyltransferase (glycine N-choleoyltransferase)           | 3,7 | -1,3  | -1,5  | 0,0  |
| ENSRNOG000000004014 | XP_237816.2         | CHMP6      | chromatin modifying protein 6                                                          | 3,7 | -2,8  | 0,1   | 4,5  |
| ENSRNOG00000011382  | XP_226076.2         | WDR33      | WD repeat domain 33                                                                    | 3,6 | -1,1  | -1,5  | 4,5  |
| ENSRNOG000000002304 | XM_001079369.3      | Tnfrsf13b  | tumor necrosis factor receptor superfamily, member 13B                                 | 3,6 | -3,1  | 0,4   | 0,0  |
| ENSRNOG00000013570  | XP_343472.1         | RAD54L2    | Rad54 like 2 (S. cerevisiae)                                                           | 3,5 | -2,6  | 0,0   | 1,4  |
| ENSRNOG000000026503 | XP_344924.2         | XRRA1      | X-ray radiation resistance associated 1                                                | 3,4 | -1,2  | -1,4  | 1,4  |
| ENSRNOG00000010602  | NM_021752           | birc2      | baculoviral IAP repeat-containing 2                                                    | 3,4 | -1,1  | -1,4  | 1,7  |
| ENSRNOG000000001957 | NM_012883           | SULT1E1    | sulfotransferase family 1E (estrogen)                                                  | 3,4 | -3,2  | 0,7   | 0,0  |
| ENSRNOG000000009303 | ENSRNOG000000009303 | Zwilch     | Zwilch, kinetochore associated, homolog (Drosophila)                                   | 3,4 | -1,2  | -1,4  | 0,6  |
| ENSRNOG00000012896  | NM_019184           | Cyp2c11    | Cytochrome P450 2C11, male-specific (CYPIIC11)                                         | 3,3 | -2,8  | 0,3   | 0,0  |

|                     |                    |            |                                                                                         |     |      |      |     |
|---------------------|--------------------|------------|-----------------------------------------------------------------------------------------|-----|------|------|-----|
| ENSRNOG00000015004  | ENSRNOG00000015004 | nd         | similar to RAD54B homolog isoform 1                                                     | 3,3 | -1,1 | -1,4 | 3,8 |
| ENSRNOG00000011630  | NM_017135          | AK3L1      | adenylate kinase 3-like 1                                                               | 3,3 | -1,1 | -1,3 | 1,7 |
| ENSRNOG00000002425  | NM_017225          | PCTP       | phosphatidylcholine transfer protein                                                    | 3,2 | 3,8  | -6,2 | 1,6 |
| ENSRNOG000000025625 | NM_020082          | Rnase4     | ribonuclease, RNase A family 4                                                          | 3,2 | -1,9 | -0,5 | 1,7 |
| ENSRNOG00000014611  | NM_017228          | ATN1       | atrophin 1                                                                              | 3,2 | -1,9 | -0,5 | 5,1 |
| ENSRNOG00000016496  | NM_017097.1        | Ctsc       | cathepsin C                                                                             | 3,2 | -0,6 | -1,7 | 1,6 |
| ENSRNOG00000006925  | XP_575458.1        | Zfp786     | Zfp786                                                                                  | 3,1 | -5,3 | 2,9  | 1,6 |
| ENSRNOG00000001060  | NP_001014149.1     | U1snrnpbp  | U11/U12 snRNP 35K                                                                       | 3,1 | -5,3 | 3,0  | 0,0 |
| ENSRNOG00000008642  | XP_573185.1        | Snx11      | sorting nexin 11                                                                        | 3,0 | -1,0 | -1,3 | 2,6 |
| ENSRNOG00000018712  | ENSRNOG00000018712 | CAMK2A     | Calcium/calmodulin-dependent protein kinase type II alpha chain                         | 2,9 | 3,3  | -5,5 | 1,4 |
| ENSRNOG00000022402  | NM_030830          | LUZP1      | leucine zipper protein 1                                                                | 2,8 | -0,9 | -1,2 | 5,1 |
| ENSRNOG00000009160  | NP_001008828.1     | RGD1562494 | similar to keratin 6 alpha                                                              | 2,8 | -2,7 | 0,6  | 0,0 |
| ENSRNOG00000012146  | NM_001047114.1     | Pomt2      | protein-O-mannosyltransferase 2; serine palmitoyltransferase, long chain base subunit 2 | 2,8 | -4,7 | 2,6  | 0,6 |
| ENSRNOG000000026116 | XP_344709.2        | sall3      | sal-like 3 (Drosophila)                                                                 | 2,8 | -4,7 | 2,6  | 0,0 |
| ENSRNOG000000000304 | NM_031812          | CD164      | CD164 molecule, sialomucin                                                              | 2,7 | -0,8 | -1,3 | 2,1 |
| ENSRNOG000000020773 | NP_001013168.1     | Map3k11    | mitogen-activated protein kinase kinase kinase 11                                       | 2,7 | -3,1 | 1,0  | 3,8 |
| ENSRNOG00000001736  | NM_053995          | BDH1       | 3-hydroxybutyrate dehydrogenase, type 1                                                 | 2,7 | -1,4 | -0,7 | 4,5 |
| ENSRNOG00000011980  | NM_057142          | lrrc7      | leucine rich repeat containing 7                                                        | 2,6 | -1,0 | -0,9 | 3,8 |
| ENSRNOG00000013323  | NM_001106204.1     | Rnf217     | probable E3 ubiquitin-protein ligase RNF217                                             | 2,6 | -3,0 | 1,0  | 1,0 |
| ENSRNOG00000009474  | XP_221037.2        | DDX42      | DEAD (Asp-Glu-Ala-Asp) box polypeptide 42                                               | 2,6 | -2,4 | 0,4  | 0,0 |
| ENSRNOG000000025074 | NM_012559          | FGG        | fibrinogen gamma chain                                                                  | 2,6 | -1,9 | 0,0  | 2,1 |
| ENSRNOG00000016346  | NM_133307          | PRKCD      | protein kinase C, delta                                                                 | 2,6 | -4,3 | 2,4  | 3,8 |
| ENSRNOG00000008510  | NM_134403          | ABTB2      | ankyrin repeat and BTB (POZ) domain containing 2                                        | 2,5 | -2,4 | 0,5  | 3,8 |
| ENSRNOG00000026455  | XP_343499.2        | GPD1L      | glycerol-3-phosphate dehydrogenase 1-like                                               | 2,5 | -2,1 | 0,2  | 3,5 |
| ENSRNOG00000024772  | XM_221075.5        | Cpsf4l     | cleavage and polyadenylation specific factor 4-like                                     | 2,5 | -3,2 | 1,4  | 0,0 |
| ENSRNOG00000002878  | NM_172320          | AFM        | afamin                                                                                  | 2,5 | -3,2 | 1,3  | 0,0 |
| ENSRNOG00000005931  | NP_113828.1        | Pgcp       | plasma glutamate carboxypeptidase                                                       | 2,5 | -2,3 | 0,4  | 2,6 |
| ENSRNOG00000017765  | NM_001039023.1     | Net1       | neuroepithelial cell transforming 1                                                     | 2,4 | -2,8 | 1,0  | 1,4 |
| ENSRNOG00000017489  | XP_226533.3        | Gse1       | genetic suppressor element 1                                                            | 2,4 | -3,1 | 1,3  | 0,0 |
| ENSRNOG00000001764  | XM_221315.6        | vps8       | vacuolar protein sorting 8 homolog (S. cerevisiae)                                      | 2,4 | -3,9 | 2,2  | 2,9 |
| ENSRNOG00000002203  | NM_001100564.1     | Lin54      | lin-54 homolog (C. elegans)                                                             | 2,4 | -4,0 | 2,2  | 1,0 |
| ENSRNOG00000011111  | XP_234430.2        | RGD1309492 | similar to mKIAA1737 protein                                                            | 2,3 | -0,8 | -1,0 | 3,5 |
| ENSRNOG00000001229  | Q9QZD2             | COL18A1    | collagen, type XVIII, alpha 1                                                           | 2,3 | -0,6 | -1,2 | 4,5 |
| ENSRNOG00000010079  | NM_019292          | CAR3       | carbonic anhydrase 3                                                                    | 2,2 | -1,1 | -0,6 | 0,6 |
| ENSRNOG00000004685  | ENSRNOG00000004685 | Mta3       | metastasis associated 1 family, member 3                                                | 2,2 | -3,8 | 2,1  | 0,6 |
| ENSRNOG00000018899  | XM_003749455.1     | C5         | complement component 5                                                                  | 2,2 | -0,4 | -1,2 | 3,8 |
| ENSRNOG00000016595  | NM_024385          | hhex       | hematopoietically expressed homeobox                                                    | 2,2 | -2,3 | 0,6  | 0,0 |
| ENSRNOG00000004601  | XP_230613.2        | HAO1       | hydroxyacid oxidase (glycolate oxidase) 1                                               | 2,2 | -3,4 | 1,8  | 0,0 |
| ENSRNOG00000001407  | XP_222022.3        | tfr2       | transferrin receptor 2                                                                  | 2,2 | 0,9  | -2,6 | 3,5 |
| ENSRNOG00000002280  | XP_217566.2        | SH3BGRL    | SH3 domain binding glutamic acid-rich protein like                                      | 2,1 | -1,9 | 0,3  | 5,1 |
| ENSRNOG00000012190  | XP_236535.1        | CLDN2      | claudin 2                                                                               | 2,1 | -0,7 | -0,9 | 5,1 |
| ENSRNOG00000004786  | NM_019623.2        | Cyp4f1     | cytochrome P450 4F1                                                                     | 2,1 | -2,3 | 0,7  | 2,6 |
| ENSRNOG00000012878  | NM_012511          | Atp7b      | ATPase, Cu++ transporting, beta polypeptide                                             | 2,1 | -3,4 | 1,8  | 1,6 |
| ENSRNOG00000020928  | NM_012542          | Cyp2a1     | cytochrome P450 2A1 (hepatic steroid hydroxylase IIA1)                                  | 2,1 | -1,4 | -0,1 | 5,1 |
| ENSRNOG00000009549  | NM_001109606.1     | Fbxo3      | F-box protein 3                                                                         | 2,1 | -0,3 | -1,3 | 5,1 |

|                     |                     |            |                                                                              |     |      |      |     |
|---------------------|---------------------|------------|------------------------------------------------------------------------------|-----|------|------|-----|
| ENSRNOG00000014743  | NM_033349           | HAGH       | hydroxyacyl glutathione hydrolase                                            | 2,0 | -1,5 | 0,0  | 5,1 |
| ENSRNOG00000000033  | XP_223107.3         | Tmcc2      | transmembrane and coiled-coil domain family 2                                | 2,0 | -3,4 | 1,9  | 1,6 |
| ENSRNOG000000020928 | NM_134369           | Cyp2a1     | cytochrome P450 2A1 (hepatic steroid hydroxylase IIA1)                       | 2,0 | -0,8 | -0,7 | 2,9 |
| ENSRNOG000000011026 | NP_001012488.1      | Pqcp       | polyglutamine-containing protein                                             | 2,0 | -2,0 | 0,5  | 4,5 |
| ENSRNOG00000003357  | NM_032085.1         | Col3a1     | collagen, type III, alpha 1                                                  | 2,0 | -1,9 | 0,4  | 2,1 |
| ENSRNOG000000025510 | NP_942071.1         | Q62669     | beta-globin                                                                  | 2,0 | -0,6 | -0,8 | 1,4 |
| ENSRNOG000000020637 | XP_219327.3         | HMX3       | H6 family homeobox 3                                                         | 1,9 | -3,2 | 1,8  | 5,1 |
| ENSRNOG000000001979 | NM_153724           | RCAN1      | regulator of calcineurin 1                                                   | 1,9 | -2,1 | 0,7  | 0,0 |
| ENSRNOG000000025056 | ENSRNOG000000025056 | LOC314328  | similar to chromosome 14 open reading frame 166B                             | 1,9 | -1,9 | 0,5  | 0,0 |
| ENSRNOG000000014565 | NP_955437.1         | LCMT1      | leucine carboxyl methyltransferase 1                                         | 1,8 | -2,3 | 0,9  | 1,4 |
| ENSRNOG000000019467 | NM_001106534.2      | Fer1l4     | fer-1-like 4 (C. elegans)                                                    | 1,8 | -2,2 | 0,8  | 2,6 |
| ENSRNOG000000012926 | NP_001000754.1      | Olr363     | olfactory receptor 363                                                       | 1,8 | -1,1 | -0,3 | 2,1 |
| ENSRNOG000000001475 | ENSRNOG000000001475 | wbscr27    | Williams Beuren syndrome chromosome region 27                                | 1,8 | -3,1 | 1,7  | 3,5 |
| ENSRNOG000000025106 | ENSRNOG000000025106 | LOC502175  | similar to peroxiredoxin 1                                                   | 1,8 | -2,2 | 0,8  | 0,0 |
| ENSRNOG000000023116 | XP_343055.2         | Tmem195    | transmembrane protein 195                                                    | 1,8 | -3,1 | 1,8  | 0,0 |
| ENSRNOG000000027742 | XP_231125.3         | ADAMTSL2   | ADAMTS-like 2                                                                | 1,7 | 0,2  | -1,6 | 3,5 |
| ENSRNOG000000006042 | Q91XP0              | Rup2       | urinary protein 2                                                            | 1,7 | -2,6 | 1,3  | 0,0 |
| ENSRNOG000000020676 | NM_130403           | Ppp1r14a   | protein phosphatase 1, regulatory (inhibitor) subunit 14A                    | 1,7 | -2,4 | 1,1  | 1,6 |
| ENSRNOG000000003456 | NM_001013961.1      | Actr1      | actin-related protein T1                                                     | 1,7 | 2,0  | -3,2 | 2,9 |
| ENSRNOG000000011269 | NM_031732           | SULT1C3    | sulfotransferase family, cytosolic, 1C, member 3                             | 1,7 | -1,8 | 0,5  | 0,6 |
| ENSRNOG000000024848 | NM_052797.1         | Fga        | fibrinogen alpha chain                                                       | 1,7 | -1,9 | 0,6  | 1,7 |
| ENSRNOG000000016791 | NM_017127.1         | ChkA       | choline kinase alpha                                                         | 1,7 | -1,9 | 0,6  | 0,6 |
| ENSRNOG000000004332 | NM_031507           | egfr       | epidermal growth factor receptor                                             | 1,6 | -1,5 | 0,2  | 3,5 |
| ENSRNOG000000019441 | NM_017265.4         | Hsd3b6     | hydroxy-delta-5-steroid dehydrogenase, 3 beta- and steroid delta-isomerase 6 | 1,6 | -2,7 | 1,5  | 0,6 |
| ENSRNOG000000010478 | NM_182474           | SPI1       | serine protease inhibitor                                                    | 1,6 | -2,5 | 1,3  | 0,0 |
| ENSRNOG000000019417 | NM_012584           | Hsd3b5     | hydroxy-delta-5-steroid dehydrogenase, 3 beta- and steroid delta-isomerase 5 | 1,6 | -2,5 | 1,3  | 0,0 |
| ENSRNOG000000000419 | NP_997631.1         | CFB        | complement factor B                                                          | 1,6 | 0,5  | -1,7 | 4,5 |
| ENSRNOG000000011864 | NM_172335           | gm2a       | GM2 ganglioside activator                                                    | 1,6 | -1,5 | 0,3  | 2,9 |
| ENSRNOG000000025286 | XP_215826.3         | PANK2      | pantothenate kinase 2 (Hallervorden-Spatz syndrome)                          | 1,5 | -2,6 | 1,4  | 3,8 |
| ENSRNOG000000014900 | NM_001271248.1      | Crem       | cAMP responsive element modulator                                            | 1,5 | -1,6 | 0,5  | 2,6 |
| ENSRNOG000000022239 | XP_340856.1         | TUSC5      | tumor suppressor candidate 5                                                 | 1,5 | -2,5 | 1,4  | 2,6 |
| ENSRNOG000000001823 | NM_001113344.1      | St6gal1    | ST6 beta-galactosamide alpha-2,6-sialyltransferase 1                         | 1,5 | -2,5 | 1,4  | 2,1 |
| ENSRNOG000000010309 | NM_031553           | NFYB       | nuclear transcription factor-Y beta                                          | 1,4 | -2,2 | 1,1  | 2,1 |
| ENSRNOG000000003763 | NM_053512           | Prdx4      | peroxiredoxin 4                                                              | 1,4 | -2,5 | 1,4  | 3,5 |
| ENSRNOG000000012315 | NM_001048185        | agmaT      | agmatine ureohydrolase (agmatinase)                                          | 1,4 | -2,0 | 1,0  | 4,5 |
| ENSRNOG000000017843 | NP_001014281.1      | POLR3K     | polymerase (RNA) III (DNA directed) polypeptide K, 12.3 kDa                  | 1,4 | -2,3 | 1,3  | 4,5 |
| ENSRNOG000000016620 | NM_022288.1         | Csnk1g1    | casein kinase 1, gamma 1                                                     | 1,4 | -1,5 | 0,5  | 4,5 |
| ENSRNOG000000018299 | XP_225875.3         | RGD1564677 | similar to transcription factor ONECUT2                                      | 1,4 | -2,0 | 1,0  | 4,5 |
| ENSRNOG000000006709 | NM_145779           | PZP        | pregnancy-zone protein                                                       | 1,3 | -2,2 | 1,2  | 2,9 |
| ENSRNOG000000008145 | XP_343114.2         | TRAF3      | Tnf receptor-associated factor 3                                             | 1,3 | 1,5  | -2,5 | 5,1 |
| ENSRNOG000000000604 | Q99PA1              | HDAC2      | similar to Histone deacetylase 2 (HD2); histone deacetylase 2                | 1,3 | -3,2 | 2,3  | 0,0 |
| ENSRNOG000000014285 | NM_001107024.1      | Ssh2       | slingshot protein phosphatase 2                                              | 1,3 | -2,0 | 1,0  | 4,5 |
| ENSRNOG000000019996 | NM_012716           | SLC16A1    | solute carrier family 16, member 1 (monocarboxylic acid transporter 1)       | 1,2 | -2,2 | 1,3  | 1,0 |
| ENSRNOG000000002021 | NM_001170328.1      | Son        | Son DNA binding protein                                                      | 1,2 | 1,1  | -2,0 | 5,1 |
| ENSRNOG000000009582 | NM_053562           | RPE65      | retinal pigment epithelium 65                                                | 1,2 | 0,7  | -1,6 | 2,9 |

|                     |                     |              |                                                                                     |     |      |      |     |
|---------------------|---------------------|--------------|-------------------------------------------------------------------------------------|-----|------|------|-----|
| ENSRNOG00000017223  | NM_053491           | plg          | plasminogen                                                                         | 1,2 | -1,7 | 0,8  | 4,5 |
| ENSRNOG000000025019 | ENSRNOG000000025019 | DIO1         | deiiodinase, iodothyronine, type I                                                  | 1,2 | -2,3 | 1,5  | 2,9 |
| ENSRNOG000000001062 | NM_001246665        | Setd8        | SET domain containing (lysine methyltransferase) 8                                  | 1,2 | -2,0 | 1,2  | 4,5 |
| ENSRNOG000000016123 | XP_344577.2         | Rnf144b      | ring finger protein 144B                                                            | 1,1 | -1,8 | 1,0  | 3,5 |
| ENSRNOG000000025079 | NP_001020881.1      | FAM126B      | family with sequence similarity 126, member B                                       | 1,1 | -1,6 | 0,7  | 2,6 |
| ENSRNOG000000019262 | XP_236715.3         | RGD1307844   | similar to 106 kDa O-GlcNAc transferase-interacting protein                         | 1,1 | -2,0 | 1,2  | 2,1 |
| ENSRNOG000000005109 | NM_001044276.1      | Rprm         | reprimo, TP53 dependent G2 arrest mediator candidate                                | 1,1 | -1,5 | 0,7  | 5,1 |
| ENSRNOG000000018322 | NM_053554           | PICALM       | phosphatidylinositol binding clathrin assembly protein                              | 1,1 | -2,2 | 1,4  | 3,8 |
| ENSRNOG000000017923 | NM_134468           | pncK         | pregnancy upregulated non-ubiquitously expressed CaM kinase                         | 1,1 | -1,4 | 0,6  | 5,1 |
| ENSRNOG000000004329 | XM_002726903        | Rdh2         | Rattus norvegicus Rdh2 protein-like, transcript variant 1 (LOC100365958)            | 1,1 | -1,1 | 0,3  | 5,1 |
| ENSRNOG000000009284 | NM_012742           | foxa1        | forkhead box A1                                                                     | 1,1 | -2,1 | 1,3  | 1,0 |
| ENSRNOG000000019460 | NM_017199           | SSRD         | signal sequence receptor, delta (Ssr4),                                             | 1,0 | -1,9 | 1,2  | 5,1 |
| ENSRNOG000000000028 | NM_053347           | NDE1         | nudE nuclear distribution gene E homolog 1 (A. nidulans)                            | 1,0 | 1,1  | -1,9 | 3,8 |
| ENSRNOG000000018340 | XP_345146.2         | MARVELD2     | MARVEL domain containing 2                                                          | 1,0 | -2,1 | 1,3  | 4,5 |
| ENSRNOG000000014766 | NM_001013089.2      | Galt         | galactose-1-phosphate uridylyltransferase                                           | 1,0 | -2,0 | 1,2  | 1,7 |
| ENSRNOG000000027026 | XM_001065610.3      | JAZF1        | JAZF zinc finger 1                                                                  | 1,0 | -2,1 | 1,4  | 5,1 |
| ENSRNOG000000009609 | ENSRNOG000000009609 | GTPBP4       | Nucleolar GTP-binding protein 1 (Chronic renal failure gene protein)                | 1,0 | -2,6 | 1,9  | 0,6 |
| ENSRNOG000000002001 | NM_019227           | ITSN1        | intersectin 1 (SH3 domain protein)                                                  | 0,9 | -2,2 | 1,5  | 4,5 |
| ENSRNOG000000009273 | NP_671745.1         | MUP          | alpha 2U globulin; Major urinary protein precursor (MUP)                            | 0,9 | -1,6 | 0,9  | 1,7 |
| ENSRNOG000000006388 | NM_022268           | PYGL         | phosphorylase, glycogen, liver                                                      | 0,8 | -2,4 | 1,8  | 0,0 |
| ENSRNOG000000000786 | NP_001002831.1      | rpp21        | ribonuclease P 21 subunit (human)                                                   | 0,8 | -1,8 | 1,1  | 2,6 |
| ENSRNOG000000002104 | NM_001037347.2      | Scaf4        | splicing factor, arginine/serine-rich 15                                            | 0,8 | -1,8 | 1,1  | 5,1 |
| ENSRNOG000000020608 | NP_001011980.1      | ppan         | peter pan homolog (Drosophila)                                                      | 0,8 | -2,7 | 2,1  | 0,6 |
| ENSRNOG000000018764 | XP_224719.1         | B3gnt3       | UDP-GlcNAc:betaGal beta-1,3-N-acetylglucosaminyltransferase 3                       | 0,8 | 1,0  | -1,6 | 1,6 |
| ENSRNOG000000001064 | ENSRNOG000000001064 | Sbno1        | strawberry notch homolog 1 (Drosophila)                                             | 0,8 | -2,1 | 1,5  | 5,1 |
| ENSRNOG000000013520 | NM_012860           | mat2a        | methionine adenosyltransferase II, alpha                                            | 0,8 | -2,6 | 2,0  | 1,7 |
| ENSRNOG000000000978 | NM_153312           | CYP3A2       | Cytochrome P450 3A2                                                                 | 0,8 | 0,8  | -1,3 | 4,5 |
| ENSRNOG000000007240 | XP_232622.2         | rrs1         | RRS1 ribosome biogenesis regulator homolog (S. cerevisiae)                          | 0,8 | -3,3 | 2,7  | 0,0 |
| ENSRNOG000000015772 | NM_022539           | RGD1560341   | similar to Methionine aminopeptidase 2 (MetAP 2)                                    | 0,7 | -3,0 | 2,4  | 1,0 |
| ENSRNOG000000027002 | XM_003749177        | LOC100909748 | PREDICTED: microtubule-associated serine/threonine-protein kinase 4-like            | 0,7 | -2,0 | 1,4  | 4,5 |
| ENSRNOG000000020793 | NP_001020576.1      | RUVBL2       | RuvB-like 2 (E. coli); similar to RuvB-like 2; similar to RuvB-like 2 (p47 protein) | 0,7 | -2,8 | 2,3  | 0,6 |
| ENSRNOG000000007177 | NP_001020294.2      | kdelc2       | KDEL (Lys-Asp-Glu-Leu) containing 2                                                 | 0,7 | -1,7 | 1,2  | 5,1 |
| ENSRNOG000000017946 | NM_139262           | Ctsq         | cathepsin Q                                                                         | 0,7 | -1,4 | 0,9  | 5,1 |
| ENSRNOG000000003625 | NP_001012025.1      | UBXN4        | UBX domain protein 4                                                                | 0,6 | -2,0 | 1,5  | 5,1 |
| ENSRNOG000000017397 | NP_001012159.1      | upf3a        | UPF3 regulator of nonsense transcripts homolog A (yeast)                            | 0,6 | -1,9 | 1,5  | 3,8 |
| ENSRNOG000000000064 | NM_080481           | Atp5i        | ATP synthase, H+ transporting, mitochondrial F0 complex, subunit E                  | 0,6 | -2,2 | 1,7  | 2,1 |
| ENSRNOG000000015989 | XP_214491.2         | mRpL32       | mitochondrial ribosomal protein L32                                                 | 0,6 | -2,4 | 2,0  | 2,1 |
| ENSRNOG000000027392 | ENSRNOG000000027392 | RGD1565512   | similar to hypothetical protein 4932418E24                                          | 0,6 | -1,9 | 1,5  | 5,1 |
| ENSRNOG000000010756 | NM_030989           | tp53         | tumor protein p53                                                                   | 0,6 | -2,3 | 1,8  | 3,8 |
| ENSRNOG000000026638 | NM_031726.1         | Scamp5       | secretory carrier membrane protein 5                                                | 0,5 | 1,4  | -1,8 | 3,5 |
| ENSRNOG000000006217 | NM_001108064.1      | Wiz          | widely-interspaced zinc finger motifs                                               | 0,5 | -3,1 | 2,7  | 1,7 |
| ENSRNOG000000019630 | NM_053493           | Hac11        | 2-hydroxyacyl-CoA lyase 1                                                           | 0,5 | -2,4 | 2,0  | 0,0 |
| ENSRNOG000000018168 | NP_001009601.1      | KLC4         | kinesin light chain 4                                                               | 0,5 | -1,8 | 1,5  | 1,6 |
| ENSRNOG000000004035 | XP_235128.2         | Hrb2         | HIV-1 Rev binding protein 2                                                         | 0,5 | -2,8 | 2,4  | 2,1 |
| ENSRNOG000000001338 | NM_017233           | hpd          | 4-hydroxyphenylpyruvate dioxygenase                                                 | 0,4 | 1,3  | -1,6 | 4,5 |

|                     |                     |                |                                                                                   |      |      |      |     |
|---------------------|---------------------|----------------|-----------------------------------------------------------------------------------|------|------|------|-----|
| ENSRNOG00000011913  | NM_012532           | CP             | ceruloplasmin (ferroxidase)                                                       | 0,4  | 1,2  | -1,5 | 4,5 |
| ENSRNOG000000027761 | XP_229199.3         | htatsf1        | HIV-1 Tat specific factor 1                                                       | 0,4  | -2,2 | 1,9  | 4,5 |
| ENSRNOG000000013004 | NM_138884           | AKR1D1         | aldo-keto reductase family 1, member D1 (delta 4-3-ketosteroid-5-beta-reductase)  | 0,4  | -1,5 | 1,3  | 2,9 |
| ENSRNOG000000001379 | NM_147206           | Cyp3a9         | cytochrome P450 3A9                                                               | 0,3  | 1,3  | -1,5 | 3,8 |
| ENSRNOG000000018704 | NM_022869           | NOLC1          | nucleolar and coiled-body phosphoprotein 1                                        | 0,3  | -1,6 | 1,4  | 3,5 |
| ENSRNOG000000020194 | NM_001013179.1      | Hes6           | hairy and enhancer of split 6 (Drosophila)                                        | 0,3  | 1,0  | -1,2 | 4,5 |
| ENSRNOG000000004006 | NM_012699           | dnajb9         | DnaJ (Hsp40) homolog, subfamily B, member 9                                       | 0,3  | -1,5 | 1,2  | 3,8 |
| ENSRNOG000000024745 | XM_003749950        | MUP            | alpha 2U globulin; Major urinary protein precursor (MUP)                          | 0,3  | -2,6 | 2,4  | 0,0 |
| ENSRNOG000000011784 | NM_001106881.1      | Mocs1          | molybdenum cofactor synthesis 1                                                   | 0,3  | 1,7  | -1,9 | 3,8 |
| ENSRNOG000000001990 | NM_173295           | Ugt2b1         | UDP glucuronosyltransferase 2 family, polypeptide B17                             | 0,2  | 1,6  | -1,8 | 1,4 |
| ENSRNOG000000011728 | NM_001039713.1      | Fto            | fat mass and obesity associated                                                   | 0,2  | -2,4 | 2,2  | 4,5 |
| ENSRNOG000000009329 | NM_145775           | Nr1d1          | nuclear receptor subfamily 1, group D, member 1 (REV-ERBalpha)                    | 0,2  | 1,3  | -1,4 | 3,8 |
| ENSRNOG000000011414 | NM_031595.1         | Psmc3          | proteasome (prosome, macropain) 26S subunit, ATPase 3                             | 0,1  | 1,4  | -1,5 | 5,1 |
| ENSRNOG000000005064 | NM_031138           | ube2b          | ubiquitin-conjugating enzyme E2B, RAD6 homology (S. cerevisiae)                   | 0,1  | -2,1 | 2,0  | 4,5 |
| ENSRNOG000000026880 | XM_003751862.1      | Usp38          | ubiquitin specific peptidase 38                                                   | 0,1  | -1,9 | 1,8  | 3,5 |
| ENSRNOG000000015654 | NM_017094.1         | GHR            | growth hormone receptor                                                           | 0,1  | 2,3  | -2,3 | 1,0 |
| ENSRNOG000000019656 | NP_001012047.1      | BTB            | biotinidase                                                                       | 0,1  | -1,8 | 1,8  | 2,1 |
| ENSRNOG000000020928 | NM_012692           | Cyp2a1         | cytochrome P450 2A1 (hepatic steroid hydroxylase IIA1)                            | -0,2 | 1,3  | -1,2 | 4,5 |
| ENSRNOG000000027116 | XR_146223           | LOC100362689   | PREDICTED: Rattus norvegicus keratin 8-like                                       | -0,2 | 2,3  | -2,2 | 0,6 |
| ENSRNOG000000001515 | XP_230983.3         | RGD1561394     | similar to MLTK-beta                                                              | -0,2 | 2,1  | -2,0 | 3,5 |
| ENSRNOG000000027142 | XP_578505.1         | RGD1565680     | similar to Hypothetical protein DJ1198H6.2                                        | -0,2 | 1,7  | -1,5 | 3,8 |
| ENSRNOG000000000658 | NM_053922.1         | Acacb          | acetyl-Coenzyme A carboxylase beta                                                | -0,3 | 1,8  | -1,6 | 3,5 |
| ENSRNOG000000011635 | NM_001100477.1      | Ces2e          | carboxylesterase 5                                                                | -0,3 | 1,2  | -1,0 | 3,8 |
| ENSRNOG000000013956 | NM_134467           | Rnf38          | ring finger protein 38                                                            | -0,3 | 1,4  | -1,2 | 5,1 |
| ENSRNOG000000009779 | NM_199370.1         | krt8           | keratin 8                                                                         | -0,3 | 1,7  | -1,5 | 2,6 |
| ENSRNOG000000014886 | NP_001020205.1      | fam107b        | family with sequence similarity 107, member B                                     | -0,3 | 1,6  | -1,4 | 4,5 |
| ENSRNOG000000015741 | NM_133611           | SLC2A13        | solute carrier family 2 (facilitated glucose transporter), member 13              | -0,3 | -1,8 | 2,1  | 4,5 |
| ENSRNOG000000027844 | ENSRNOG000000027844 | CWC22          | similar to CG12750-PA; hypothetical protein LOC500684                             | -0,3 | 2,3  | -2,0 | 5,1 |
| ENSRNOG000000005434 | NP_001013148.1      | SPTBN1         | spectrin, beta, non-erythrocytic 1                                                | -0,3 | 1,9  | -1,6 | 5,1 |
| ENSRNOG000000016841 | NM_031039           | GPT2           | glutamic pyruvate transaminase (alanine aminotransferase) 2                       | -0,4 | 1,5  | -1,3 | 5,1 |
| ENSRNOG000000023411 | nd                  | RGD1564982     | RGD1564982                                                                        | -0,4 | 2,6  | -2,4 | 2,6 |
| ENSRNOG000000008755 | NM_145770.2         | ACOX1          | acyl-CoA oxidase 1, palmitoyl                                                     | -0,4 | 1,8  | -1,5 | 2,1 |
| ENSRNOG000000001240 | ENSRNOG000000001240 | GSTT3          | glutathione S-transferase, theta 3                                                | -0,5 | 1,2  | -0,8 | 5,1 |
| ENSRNOG000000010663 | ENSRNOG000000010663 | RGD1307220     | similar to RIKEN cDNA E330026B02                                                  | -0,5 | 2,1  | -1,7 | 2,9 |
| ENSRNOG000000020928 | NM_012692.1         | Cyp2a1         | cytochrome P450 2A1 (hepatic steroid hydroxylase IIA1)                            | -0,6 | 1,4  | -0,9 | 4,5 |
| ENSRNOG000000013178 | XP_214698.3         | cmip           | c-Maf-inducing protein                                                            | -0,6 | 2,0  | -1,5 | 5,1 |
| ENSRNOG000000020266 | Q8K1G4              | Eef2,LOC305181 | similar to Elongation factor 2 (EF-2); eukaryotic translation elongation factor 2 | -0,7 | 2,1  | -1,6 | 2,9 |
| ENSRNOG000000022047 | XM_224924           | nd             | PREDICTED: Rattus norvegicus 60S ribosomal protein L9-like (RGD1561928)           | -0,7 | 2,2  | -1,7 | 2,9 |
| ENSRNOG000000019319 | XP_218965.3         | fchsd2         | FCH and double SH3 domains 2                                                      | -0,7 | 1,8  | -1,3 | 5,1 |
| ENSRNOG000000019735 | NP_001015007.1      | DPH2           | DPH2 homolog (S. cerevisiae)                                                      | -0,7 | 2,2  | -1,6 | 3,8 |
| ENSRNOG000000018567 | NP_112410.1         | SLC20A1        | solute carrier family 20 (phosphate transporter), member 1                        | -0,8 | 1,6  | -1,1 | 3,8 |
| ENSRNOG000000018450 | XP_219484.2         | SLC25A22       | solute carrier family 25 (mitochondrial carrier, glutamate), member 22            | -0,8 | 2,1  | -1,5 | 0,6 |
| ENSRNOG000000016023 | XP_219925.3         | KANK1          | ankyrin repeat domain 15                                                          | -0,8 | 1,7  | -1,1 | 5,1 |
| ENSRNOG000000018566 | NM_013156           | CTSL1          | cathepsin L1                                                                      | -0,8 | 1,6  | -1,0 | 4,5 |
| ENSRNOG000000013241 | ENSRNOG000000013241 | LOC363010      | similar to Cytochrome P450 2C7 (CYIIC7) (P450F) (PTF1)                            | -0,9 | 1,3  | -0,7 | 4,5 |

|                    |                    |            |                                                                               |      |     |      |     |
|--------------------|--------------------|------------|-------------------------------------------------------------------------------|------|-----|------|-----|
| ENSRNOG00000019383 | NM_019194          | Tef        | thyrotrophic embryonic factor                                                 | -0,9 | 2,0 | -1,3 | 2,6 |
| ENSRNOG00000017601 | NM_017070          | srd5a1     | steroid-5-alpha-reductase, alpha polypeptide 1                                | -0,9 | 2,2 | -1,5 | 0,0 |
| ENSRNOG00000009001 | NM_001130563.1     | Mtss1      | metastasis suppressor 1                                                       | -0,9 | 1,8 | -1,1 | 4,5 |
| ENSRNOG00000011708 | NM_031572          | CYP2c12    | Cytochrome P450 2C12, female-specific (CYP11C12)                              | -0,9 | 1,4 | -0,7 | 1,6 |
| ENSRNOG00000022655 | XP_573575.1        | LOC501166  | similar to Hnrpa3 protein                                                     | -0,9 | 1,9 | -1,2 | 5,1 |
| ENSRNOG00000009486 | NM_001044770       | Cyp4a2     | cytochrome P450 4a2                                                           | -0,9 | 1,4 | -0,7 | 3,8 |
| ENSRNOG00000008065 | XP_220308.3        | WWC1       | WW and C2 domain containing 1                                                 | -0,9 | 1,9 | -1,2 | 3,8 |
| ENSRNOG00000017093 | ENSRNOG00000017093 | RGD1311307 | similar to 1300014I06Rik protein                                              | -0,9 | 2,2 | -1,5 | 2,9 |
| ENSRNOG00000006570 | XP_234320.3        | PLEKHG3    | pleckstrin homology domain containing, family G (with RhoGef domain) member 3 | -1,0 | 2,0 | -1,3 | 4,5 |
| ENSRNOG00000019503 | NP_001011916.1     | Rec8       | REC8 homolog (yeast)                                                          | -1,0 | 2,0 | -1,3 | 2,6 |
| ENSRNOG00000005906 | NM_031561          | CD36       | FAT/CD36 (thrombospondin receptor)                                            | -1,0 | 2,1 | -1,4 | 0,0 |
| ENSRNOG00000021095 | NM_172317          | fxyd3      | FXD domain-containing ion transport regulator 3                               | -1,0 | 2,5 | -1,7 | 4,5 |
| ENSRNOG00000015701 | XP_225250.3        | Rreb1      | ras responsive element binding protein 1                                      | -1,0 | 2,2 | -1,5 | 2,1 |
| ENSRNOG00000001205 | XP_215367.2        | AGPAT3     | 1-acylglycerol-3-phosphate O-acyltransferase 3                                | -1,0 | 1,8 | -1,0 | 3,8 |
| ENSRNOG00000013469 | XP_225257.2        | TXNDC5     | thioredoxin domain containing 5                                               | -1,0 | 2,8 | -2,0 | 1,7 |
| ENSRNOG00000016818 | NM_053429          | fgfr3      | fibroblast growth factor receptor 3                                           | -1,0 | 2,9 | -2,2 | 0,6 |
| ENSRNOG00000019832 | XP_219691.3        | Bbs1       | Bardet-Biedl syndrome 1 homolog (human)                                       | -1,1 | 2,3 | -1,6 | 1,4 |
| ENSRNOG00000019369 | NP_001009292.1     | Giyd2      | GIY-YIG domain containing 2                                                   | -1,1 | 2,4 | -1,6 | 4,5 |
| ENSRNOG00000021102 | NM_017288          | SCN1B      | sodium channel, voltage-gated, type I, beta                                   | -1,1 | 2,1 | -1,3 | 2,1 |
| ENSRNOG00000011351 | NM_012860.2        | Mat1a      | methionine adenosyltransferase I, alpha                                       | -1,1 | 1,7 | -0,9 | 2,1 |
| ENSRNOG00000008116 | NM_138905          | Ppap2b     | phosphatidic acid phosphatase type 2B                                         | -1,1 | 1,7 | -0,9 | 3,5 |
| ENSRNOG00000019308 | NM_012911          | arrb2      | arrestin, beta 2                                                              | -1,1 | 2,2 | -1,4 | 4,5 |
| ENSRNOG00000017188 | NM_178847.2        | Cyp27a1    | cytochrome P450 27A1 (sterol 26-hydroxylase, mitochondrial)                   | -1,2 | 1,4 | -0,5 | 3,5 |
| ENSRNOG00000005357 | XP_220595.3        | RGD1563106 | similar to novel protein                                                      | -1,2 | 2,6 | -1,7 | 2,6 |
| ENSRNOG00000004474 | XP_216721.2        | Klhc2      | kelch domain containing 2                                                     | -1,2 | 2,1 | -1,2 | 4,5 |
| ENSRNOG00000021027 | NM_012543          | dbp        | D site of albumin promoter (albumin D-box) binding protein                    | -1,2 | 1,7 | -0,8 | 2,9 |
| ENSRNOG00000002358 | NM_133383          | Scpep1     | serine carboxypeptidase 1                                                     | -1,2 | 2,1 | -1,2 | 3,5 |
| ENSRNOG00000027302 | ENSRNOG00000027302 | Pcdhgb2    | protocadherin gamma subfamily B, 2                                            | -1,2 | 1,9 | -0,9 | 5,1 |
| ENSRNOG00000019494 | NP_001020808.1     | PSMB10     | proteasome (prosome, macropain) subunit, beta type 10                         | -1,2 | 1,9 | -1,0 | 4,5 |
| ENSRNOG00000020029 | ENSRNOG00000020029 | nd         | hypothetical protein LOC682248; similar to RIKEN cDNA 9530058B02              | -1,2 | 2,8 | -1,8 | 0,6 |
| ENSRNOG00000010048 | NM_024130          | DCTN1      | dynactin 1                                                                    | -1,3 | 2,1 | -1,1 | 3,8 |
| ENSRNOG00000017749 | NM_133540          | Nkg7       | natural killer cell group 7 sequence                                          | -1,4 | 1,3 | -0,3 | 3,8 |
| ENSRNOG00000017808 | NM_053536          | klf15      | Kruppel-like factor 15                                                        | -1,4 | 2,7 | -1,7 | 1,0 |
| ENSRNOG00000008167 | NP_001007681.1     | ABHD6      | abhydrolase domain containing 6                                               | -1,4 | 2,5 | -1,5 | 1,6 |
| ENSRNOG00000028377 | ENSRNOG00000028377 | Mpl        | myeloproliferative leukemia virus oncogene                                    | -1,4 | 2,9 | -1,8 | 1,0 |
| ENSRNOG00000001442 | NM_031576          | por        | P450 (cytochrome) oxidoreductase                                              | -1,4 | 1,7 | -0,7 | 1,0 |
| ENSRNOG00000021463 | NM_013196          | PPARA,     | peroxisome proliferator activated receptor alpha                              | -1,4 | 2,6 | -1,5 | 1,0 |
| ENSRNOG00000012622 | XP_238034.3        | mmp15      | matrix metalloproteinase 15                                                   | -1,4 | 2,6 | -1,5 | 0,6 |
| ENSRNOG00000015002 | XP_220745.2        | ABHD15     | abhydrolase domain containing 15                                              | -1,4 | 2,2 | -1,1 | 3,8 |
| ENSRNOG00000028504 | XP_575987.1        | SOCS5      | suppressor of cytokine signaling 5                                            | -1,5 | 1,7 | -0,6 | 5,1 |
| ENSRNOG00000017882 | NM_001107365       | Camk1d     | calcium/calmodulin-dependent protein kinase ID                                | -1,5 | 2,1 | -1,0 | 2,9 |
| ENSRNOG00000023238 | XP_347259.2        | RGD1563309 | similar to diacylglycerol kinase, delta 130kDa isoform 1                      | -1,5 | 1,8 | -0,7 | 5,1 |
| ENSRNOG00000016541 | NP_001003401.1     | Enc1       | ectodermal-neural cortex 1                                                    | -1,5 | 1,4 | -0,3 | 4,5 |
| ENSRNOG00000019956 | NM_001107966.1     | Kdm4A      | lysine (K)-specific demethylase 4A                                            | -1,5 | 1,6 | -0,5 | 3,5 |
| ENSRNOG00000010635 | NM_001004274.2     | igfbp4     | insulin-like growth factor binding protein 4                                  | -1,5 | 3,1 | -1,9 | 0,0 |

|                     |                     |            |                                                                               |      |     |      |     |
|---------------------|---------------------|------------|-------------------------------------------------------------------------------|------|-----|------|-----|
| ENSRNOG00000015082  | NM_001106291.1      | Nlrp10     | NLR family, pyrin domain containing 10                                        | -1,5 | 2,4 | -1,2 | 5,1 |
| ENSRNOG00000010224  | NM_001015012.1      | Rab30      | RAB30, member RAS oncogene family                                             | -1,5 | 1,5 | -0,3 | 1,6 |
| ENSRNOG00000011201  | NP_942049.1         | CMTM8      | CKLF-like MARVEL transmembrane domain containing 8                            | -1,5 | 5,3 | -4,1 | 1,0 |
| ENSRNOG000000022067 | NM_001145828.1      | Tlr5       | toll-like receptor 5                                                          | -1,6 | 1,8 | -0,7 | 4,5 |
| ENSRNOG000000023718 | XP_218099.3         | Vom2r2     | similar to vomeronasal 2, receptor, 1; similar to vomeronasal 2, receptor, 2  | -1,6 | 2,2 | -1,0 | 5,1 |
| ENSRNOG000000020930 | XP_213493.3         | RGD1311493 | similar to CG13379-PA                                                         | -1,6 | 2,8 | -1,6 | 2,9 |
| ENSRNOG00000019481  | NM_031241           | Cyp8b1     | cytochrome P450 8B1                                                           | -1,6 | 2,8 | -1,6 | 0,0 |
| ENSRNOG000000021380 | XP_221105.3         | FADS6      | fatty acid desaturase domain family, member 6                                 | -1,6 | 1,4 | -0,2 | 2,1 |
| ENSRNOG000000008190 | NM_144738           | PNPLA7     | patatin-like phospholipase domain containing 7                                | -1,6 | 2,1 | -0,9 | 1,6 |
| ENSRNOG000000001404 | ENSRNOG000000001404 | AGFG2      | ArfGAP with FG repeats 2                                                      | -1,6 | 2,0 | -0,8 | 5,1 |
| ENSRNOG000000023465 | ENSRNOG000000023465 | LOC500300  | similar to hypothetical protein MGC6835                                       | -1,6 | 1,4 | -0,1 | 2,1 |
| ENSRNOG00000010216  | ENSRNOG00000010216  | RGD1308772 | similar to KIAA0564 protein                                                   | -1,6 | 3,0 | -1,8 | 1,6 |
| ENSRNOG000000004262 | NM_022799           | Nucks1     | nuclear casein kinase and cyclin-dependent kinase substrate 1                 | -1,6 | 2,2 | -1,0 | 2,6 |
| ENSRNOG000000001312 | NM_012801           | PDGA       | Platelet-derived growth factor subunit A                                      | -1,7 | 2,4 | -1,2 | 2,1 |
| ENSRNOG00000018145  | NM_001004085.2      | Crat       | carnitine acetyltransferase                                                   | -1,7 | 1,5 | -0,3 | 2,1 |
| ENSRNOG000000001259 | ENSRNOG000000001259 | Cux2       | similar to Homeobox protein cut-like 2 (Homeobox protein Cux-2) (Cut-like 2)  | -1,7 | 3,1 | -1,8 | 0,6 |
| ENSRNOG00000015409  | XP_238380.2         | USP5       | ubiquitin specific peptidase 5 (isopeptidase T)                               | -1,7 | 3,3 | -2,0 | 2,1 |
| ENSRNOG00000014168  | NP_001028876.1      | xylB       | xylulokinase homolog (H. influenzae)                                          | -1,8 | 1,7 | -0,4 | 3,5 |
| ENSRNOG00000019691  | NM_053425           | Ccs        | copper chaperone for superoxide dismutase                                     | -1,8 | 2,8 | -1,5 | 2,1 |
| ENSRNOG000000020308 | NM_022594           | ech1       | enoyl coenzyme A hydratase 1, peroxisomal                                     | -1,8 | 1,7 | -0,4 | 1,6 |
| ENSRNOG000000007104 | NM_001270597.1      | Itpr1      | inositol 1,4,5-triphosphate receptor, type 1                                  | -1,8 | 3,3 | -2,0 | 1,7 |
| ENSRNOG000000020238 | XP_340910.2         | Plekhh3    | pleckstrin homology domain containing, family H (with MyTH4 domain) member 3  | -1,8 | 1,9 | -0,5 | 1,7 |
| ENSRNOG000000026073 | NP_001008948.1      | V1ra8      | vomeronasal 1 receptor, A8                                                    | -1,8 | 2,6 | -1,3 | 3,8 |
| ENSRNOG000000005341 | NM_001106481.1      | Upp2       | uridine phosphorylase 2                                                       | -1,9 | 3,2 | -1,8 | 0,0 |
| ENSRNOG000000008498 | NM_001044294.1      | Gabarapl1  | GABA(A) receptor-associated protein like 1                                    | -1,9 | 2,2 | -0,7 | 2,6 |
| ENSRNOG00000017613  | XP_225072.3         | Pols       | polymerase (DNA directed) sigma                                               | -2,0 | 2,1 | -0,6 | 2,9 |
| ENSRNOG00000016678  | NM_133569           | ANGPTL2    | angiopoietin-like 2                                                           | -2,0 | 2,7 | -1,2 | 2,9 |
| ENSRNOG000000001197 | NM_031769           | pdxK       | pyridoxal (pyridoxine, vitamin B6) kinase                                     | -2,0 | 2,6 | -1,1 | 1,6 |
| ENSRNOG00000016097  | NM_001013164.3      | Ccb1l      | cysteine conjugate-beta lyase, cytoplasmic                                    | -2,0 | 2,5 | -1,0 | 1,0 |
| ENSRNOG000000004294 | NM_022384           | Ascl1      | achaete-scute complex homolog 1 (Drosophila)                                  | -2,1 | 3,7 | -2,1 | 0,0 |
| ENSRNOG00000013728  | XP_221047.2         | POLG2      | polymerase (DNA directed), gamma 2, accessory subunit                         | -2,2 | 1,7 | -0,1 | 4,5 |
| ENSRNOG000000008046 | XP_234295.1         | TMEM30B    | transmembrane protein 30B                                                     | -2,2 | 2,0 | -0,4 | 2,1 |
| ENSRNOG000000002013 | NM_001100653.1      | Sid1       | SID1 transmembrane family, member 1                                           | -2,2 | 2,6 | -0,9 | 2,6 |
| ENSRNOG000000009005 | NM_022667.2         | Slco2a1    | solute carrier organic anion transporter family, member 2a1                   | -2,2 | 2,4 | -0,7 | 1,0 |
| ENSRNOG00000016573  | NP_001012345.1      | DGAT2      | diacylglycerol O-acyltransferase homolog 2 (mouse)                            | -2,2 | 2,9 | -1,2 | 0,0 |
| ENSRNOG00000018736  | XP_341961.1         | PNPLA2     | patatin-like phospholipase domain containing 2                                | -2,3 | 2,0 | -0,3 | 1,6 |
| ENSRNOG00000016551  | NM_171988           | BCL2L11    | BCL2-like 11 (apoptosis facilitator)                                          | -2,4 | 2,9 | -1,1 | 1,0 |
| ENSRNOG00000011696  | NM_031048           | Lifr       | leukemia inhibitory factor receptor alpha                                     | -2,4 | 3,0 | -1,2 | 0,0 |
| ENSRNOG00000012464  | NM_134329           | adh1       | alcohol dehydrogenase 1 (class I)                                             | -2,4 | 1,9 | -0,1 | 2,6 |
| ENSRNOG000000005479 | NM_017215           | Slc1a2     | solute carrier family 1 (glial high affinity glutamate transporter), member 2 | -2,4 | 3,0 | -1,2 | 0,0 |
| ENSRNOG000000027024 | ENSRNOG000000027024 | RGS16      | regulator of G-protein signaling 16                                           | -2,6 | 4,6 | -2,7 | 0,0 |
| ENSRNOG00000012134  | NM_013178           | SCN4A      | sodium channel, voltage-gated, type 4, alpha subunit                          | -2,7 | 0,4 | 1,7  | 4,5 |
| ENSRNOG000000004821 | XP_235312.3         | SNTB1      | syntrophin, basic 1                                                           | -3,1 | 2,8 | -0,5 | 0,0 |
| ENSRNOG000000003872 | NM_133315           | SLC40A1    | solute carrier family 39 (iron-regulated transporter), member 1               | -3,1 | 4,0 | -1,7 | 0,0 |
| ENSRNOG00000017727  | NM_012630           | PRLR       | prolactin receptor                                                            | -3,3 | 4,0 | -1,5 | 0,0 |

|                    |                |         |                                                         |       |     |      |     |
|--------------------|----------------|---------|---------------------------------------------------------|-------|-----|------|-----|
| ENSRNOG00000013687 | XM_003749149   | ABLIM1  | actin-binding LIM protein 1                             | -3,6  | 3,0 | -0,3 | 2,1 |
| ENSRNOG00000011526 | NM_012999      | Pcsk6   | proprotein convertase subtilisin/kexin type 6           | -3,7  | 4,3 | -1,5 | 0,0 |
| ENSRNOG00000004692 | NM_022258      | A1bg    | alpha-1-B glycoprotein                                  | -4,0  | 7,0 | -4,0 | 0,0 |
| ENSRNOG00000017593 | NP_110491.1    | mtr     | 5-methyltetrahydrofolate-homocysteine methyltransferase | -4,4  | 4,0 | -0,7 | 0,0 |
| ENSRNOG00000019859 | NP_001004277.1 | PLA2G15 | phospholipase A2, group XV                              | -5,2  | 9,7 | -5,8 | 2,6 |
| ENSRNOG00000017672 | NM_138547      | Akr1c14 | aldo-keto reductase family 1, member C14                | -6,2  | 4,9 | -0,3 | 0,0 |
| ENSRNOG00000001763 | XM_221315.5    | Vps8    | vacuolar protein sorting 8 homolog (S. cerevisiae)      | -10,8 | 4,6 | 3,5  | 0,6 |

**Table S5. Hepatic genes regulated by intermittent GH administration whose mean expression values are different from those in E2 - and E2 plus GH-treated hypothyroid-orchidectomized rats.** Hormonal replacements with GH (TXOXGH), E2 (TXOXE2) or E2 plus GH (TXOXE2GH) in TXOX rats were described in Material and Methods. Then, differently expressed genes in the livers were identified by DNA microarrays. SAM multiclass analysis was performed to identify GH regulated genes (TXOXGH) whose mean expression values were significantly different from E2 (TXOXE2)- or E2 plus GH (TXOXE2GH)-treated TXOX rats. The table shows ENSEMBL ID, Unigene/Refseq, gene symbol, gene description, R (mean expression), and q(%).
