# Supplementary material
Source: publisher figshare collection journal article supplement (https://plos.figshare.com/articles/dataset/_/1022100)
Supplement: Supplementary file [file 1]

| ENSEMBL ID         | Unigene            | Symbol     | GENE NAME                                                                           | R         | q(%) |
|--------------------|--------------------|------------|-------------------------------------------------------------------------------------|-----------|------|
|                    |                    |            |                                                                                     | mean ± SD |      |
| Up-regulated       |                    |            |                                                                                     |           |      |
| ENSRNOG00000010478 | NM_182474.1        | LOC299282  | Serine protease inhibitor (LOC299282)                                               | 0,7       | 0,00 |
| ENSRNOG00000010410 | NM_012657.2        | Serpina3k  | serine (or cysteine) peptidase inhibitor, clade A, member 3K                        | 0,5       | 0,00 |
| ENSRNOG00000024745 | XM_003754035.1     | Mup        | major urinary protein-like (LOC688514)                                              | 1,4       | 0,00 |
| ENSRNOG00000017562 | NM_001033958.2     | Obp3       | alpha-2u globulin PGCL4 (Obp3), transcript variant 2                                | 1,5       | 0,00 |
| ENSRNOG00000013093 | NM_017158          | Cyp2c7     | cytochrome P450, family 2, subfamily c, polypeptide 7                               | 0,6       | 0,00 |
| ENSRNOG00000024772 | XM_001081632.1     | Cpsf4l     | cleavage and polyadenylation specific factor 4-like                                 | 0,7       | 0,00 |
| ENSRNOG00000005764 | NM_147213.1        | PGCL5      | alpha-2u globulin PGCL5 (LOC259245)                                                 | 1,0       | 0,00 |
| ENSRNOG00000009142 | XM_003749949.1     | PGCL4      | alpha-2u globulin PGCL4                                                             | 1,0       | 0,00 |
| ENSRNOG00000021354 | NM_017158.2        | Cyp2c7     | cytochrome P450, family 2, subfamily c, polypeptide 7                               | 0,8       | 0,00 |
| ENSRNOG00000025056 | NM_001037783.2     | LOC314328  | similar to chromosome 14 open reading frame 166B (LOC314328)                        | 0,4       | 0,00 |
| ENSRNOG00000017489 | XM_001078877.3     | Gse1       | genetic suppressor element 1                                                        | 0,4       | 0,00 |
| ENSRNOG00000028734 | NM_017158          | Cyp2c7     | cytochrome P450, family 2, subfamily c, polypeptide 7                               | 0,6       | 0,00 |
| ENSRNOG00000008095 | NM_022671.2        | ONECUT1    | one cut homeobox 1 (Onecut1)                                                        | 0,8       | 0,00 |
| ENSRNOG00000014116 | ENSRNOG00000014116 | ST-20      | alcohol sulfotransferase (hydroxysteroid sulfotransferase) (ST) (ST-20)             | 0,6       | 0,00 |
| ENSRNOG00000021310 | NM_001024764.1     | Slc36a3    | solute carrier family 36 (proton/amino acid symporter), member 3                    | 0,7       | 0,00 |
| ENSRNOG00000008965 | NM_058208          | SOCS2      | suppressor of cytokine signaling 2 (SOCS2)                                          | 1,2       | 0,00 |
| ENSRNOG00000008999 | NM_147212          | PGCL3      | alpha-2u globulin PGCL3                                                             | 0,8       | 0,00 |
| ENSRNOG00000021336 | XM_230313          | nd         | tetratricopeptide repeat domain 17 (predicted)                                      | 0,6       | 0,00 |
| ENSRNOG00000027784 | NM_001009965       | TSKU       | tsukushin; similar to hepatic protein EIIH                                          | 0,7       | 0,00 |
| ENSRNOG00000019630 | NM_053493          | Hac1       | 2-hydroxyacyl-CoA lyase 1                                                           | 0,3       | 0,00 |
| ENSRNOG00000021380 | XM_221105          | FADS6      | fatty acid desaturase domain family, member 6                                       | 0,7       | 0,00 |
| ENSRNOG00000025106 | XM_344693          | LOC502175  | similar to peroxiredoxin 1                                                          | 0,5       | 0,00 |
| ENSRNOG00000006042 | ENSRNOG00000006042 | Rup2       | urinary protein 2                                                                   | 0,6       | 0,00 |
| ENSRNOG00000012896 | NM_019184.2        | Cyp2c11    | cytochrome P450, subfamily 2, polypeptide 11                                        | 0,9       | 1,22 |
| ENSRNOG00000012443 | NM_012930.1        | Cpt2       | carnitine palmitoyltransferase 2 (Cpt2), nuclear gene encoding mitochondrial protei | 0,7       | 0,00 |
| ENSRNOG00000014365 | NM_053765          | gne        | glucosamine (UDP-N-acetyl)-2-epimerase/N-acetylmannosamine kinase                   | 0,5       | 0,00 |
| ENSRNOG00000019656 | NM_001012047       | BTD        | biotinidase                                                                         | 0,3       | 0,00 |
| ENSRNOG00000025079 | XM_237184          | FAM126B    | family with sequence similarity 126, member B                                       | 0,6       | 0,31 |
| ENSRNOG00000007545 | NM_199115          | ANGPTL4    | angiopoietin-like 4                                                                 | 0,4       | 0,00 |
| ENSRNOG00000019681 | NM_021662          | Pold1      | polymerase (DNA directed), delta 1, catalytic subunit                               | 0,2       | 0,00 |
| ENSRNOG00000014447 | NM_012565          | gck        | glucokinase                                                                         | 0,7       | 1,22 |
| ENSRNOG00000009875 | NM_053781          | Akr1b7     | aldo-keto reductase family 1, member B7                                             | 0,7       | 1,22 |
| ENSRNOG00000003020 | NM_001001509       | Hdmcp      | mitochondrial hepatocellular carcinoma-downregulated carrier protein                | 0,8       | 1,74 |
| ENSRNOG00000009160 | ENSRNOG00000009160 | RGD1562494 | similar to keratin 6 alpha                                                          | 0,2       | 0,00 |
| ENSRNOG00000017914 | NM_134449          | PRKCDBP    | protein kinase C, delta binding protein                                             | 0,5       | 0,31 |
| ENSRNOG00000015483 | NM_019340          | nd         | regulator of G-protein signaling 3 (RGS3) (fragment)                                | 0,3       | 0,00 |
| ENSRNOG00000017210 | XM_341519          | SLC22A23   | solute carrier family 22, member 23                                                 | 0,2       | 0,00 |
| ENSRNOG00000000786 | NM_001002831       | rpp21      | ribonuclease P 21 subunit (human)                                                   | 0,1       | 0,00 |
| ENSRNOG00000013275 | NM_203325.1        | Mup5       | major urinary protein 5                                                             | 0,5       | 0,98 |
| ENSRNOG00000005661 | NM_024351.2        | Hspa8      | heat shock 70kDa protein 8 (Hspa8)                                                  | 0,7       | 1,74 |
| ENSRNOG00000013241 | NM_017158          | Cyp2c7     | Cytochrome P450 2C7 (CYP11C7) (P450F) (PTF1)                                        | 0,6       | 1,74 |
| ENSRNOG00000008215 | XM_221124          | TRIM47     | tripartite motif-containing 47                                                      | 0,3       | 0,00 |
| ENSRNOG00000020990 | NM_130752          | FGF21      | fibroblast growth factor 21                                                         | 0,7       | 1,99 |
| ENSRNOG00000009754 | NM_177928.3        | Nampt      | nicotinamide phosphoribosyltransferase                                              | 0,2       | 0,00 |
| ENSRNOG00000025127 | NM_017177.1        | Chkb       | choline kinase beta (Chkb)                                                          | 0,4       | 0,55 |
| ENSRNOG00000016924 | NM_016987          | ACLY       | ATP citrate lyase                                                                   | 0,6       | 2,18 |
| ENSRNOG00000008946 | NM_024139          | RGD1565588 | similar to calcium binding protein P22                                              | 0,2       | 0,00 |
| ENSRNOG00000010337 | NM_031746          | SLC13A2    | solute carrier family 13 (sodium-dependent dicarboxylate transporter), member 2     | 0,1       | 0,00 |
| ENSRNOG00000010298 | NM_001004210       | Xbp1       | X-box binding protein 1                                                             | 0,1       | 0,00 |
| ENSRNOG00000004006 | NM_012699          | dnajb9     | DnaJ (Hsp40) homolog, subfamily B, member 9                                         | 0,5       | 1,69 |
| ENSRNOG00000028096 | XM_347304          | Marveld1   | MARVEL domain containing 1                                                          | 0,4       | 1,21 |
| ENSRNOG00000001979 | NM_153724          | RCAN1      | Down syndrome critical region homolog 1 (human)                                     | 0,5       | 1,91 |
| ENSRNOG00000007060 | NM_001007144       | Adfp       | adipose differentiation related protein                                             | 0,9       | 3,05 |
| ENSRNOG00000010224 | XM_218916          | RAB30      | RAB30, member RAS oncogene family                                                   | 0,7       | 2,52 |
| ENSRNOG00000016122 | NM_013134          | HMGCR      | 3-hydroxy-3-methylglutaryl-Coenzyme A reductase                                     | 0,8       | 2,52 |
| ENSRNOG00000009284 | NM_012742          | foxa1      | forkhead box A1                                                                     | 0,4       | 1,22 |
| ENSRNOG00000011078 | NM_053464          | SRM        | spermidine synthase                                                                 | 0,6       | 1,99 |
| ENSRNOG00000007240 | XM_232622          | rrs1       | RRS1 ribosome biogenesis regulator homolog (S. cerevisiae)                          | 0,3       | 1,21 |
| ENSRNOG00000019284 | NM_001134565.1     | Trak1      | trafficking protein, kinesin binding 1 (Trak1)                                      | 0,6       | 1,99 |
| ENSRNOG00000016044 | XM_227522          | RGD1308694 | similar to hypothetical protein MGC47256                                            | 0,2       | 0,00 |
| ENSRNOG00000004500 | NM_012603          | Myc        | myelocytomatosis oncogene                                                           | 0,8       | 3,05 |

|                     |                    |              |                                                                                       |     |      |
|---------------------|--------------------|--------------|---------------------------------------------------------------------------------------|-----|------|
| ENSRNOG00000014201  | XM_236614          | ARMET        | arginine-rich, mutated in early stage tumors                                          | 0,2 | 0,00 |
| ENSRNOG00000025063  | XM_003751764.1     | LOC682469    | lysine-specific demethylase 3B-like (LOC682469)                                       | 0,5 | 1,99 |
| ENSRNOG00000015061  | NM_053329          | Igfals       | insulin-like growth factor binding protein, acid labile subunit                       | 0,5 | 1,74 |
| ENSRNOG00000010222  | NM_012570          | glud1        | glutamate dehydrogenase 1                                                             | 0,2 | 0,31 |
| ENSRNOG00000019262  | XM_236715          | RGD1307844   | similar to 106 kDa O-GlcNAc transferase-interacting protein                           | 0,4 | 1,56 |
| ENSRNOG00000013963  | NM_001008725       | IL6ST        | interleukin 6 signal transducer                                                       | 0,2 | 0,55 |
| ENSRNOG00000015236  | NM_031668          | mybbp1a      | MYB binding protein (P160) 1a                                                         | 0,6 | 2,28 |
| ENSRNOG00000010321  | NM_001024986.1     | RGD1306186   | similar to RIKEN cDNA 4930569K13 (RGD1306186)                                         | 0,2 | 0,31 |
| ENSRNOG00000024802  | NM_058209.2        | Zfp37        | zinc finger protein 37 (Zfp37)                                                        | 0,1 | 0,00 |
| ENSRNOG00000020608  | NM_001011980       | ppan         | peter pan homolog (Drosophila)                                                        | 0,1 | 0,00 |
| ENSRNOG00000018168  | NM_001009601       | KLC4         | kinesin light chain 4                                                                 | 0,4 | 1,74 |
| ENSRNOG00000000165  | NM_012621          | pfkfb1       | 6-phosphofructo-2-kinase/fructose-2,6-biphosphatase 1                                 | 0,3 | 1,60 |
| ENSRNOG00000012117  | NM_001009478       | nd           | serum amyloid A 4 (predicted)                                                         | 0,4 | 2,01 |
| ENSRNOG00000016791  | NM_017127          | CHKA         | choline kinase alpha                                                                  | 0,7 | 3,05 |
| ENSRNOG00000018704  | NM_022869          | NOLC1        | nucleolar and coiled-body phosphoprotein 1                                            | 0,5 | 2,08 |
| ENSRNOG00000009432  | NM_019356          | EIF2S1       | hypothetical gene supported by NM_019356; eukaryotic translation initiation factor    | 0,3 | 1,56 |
| ENSRNOG00000009474  | XM_221037          | DDX42        | DEAD (Asp-Glu-Ala-Asp) box polypeptide 42                                             | 0,2 | 0,55 |
| ENSRNOG00000023633  | XM_236253          | CRABP1       | cellular retinoic acid binding protein 1                                              | 0,4 | 1,99 |
| ENSRNOG00000025087  | NM_001008808       | KRT73        | keratin 73                                                                            | 0,4 | 1,99 |
| ENSRNOG00000003620  | NM_053433          | fmo3         | flavin containing monooxygenase 3                                                     | 0,4 | 1,74 |
| ENSRNOG00000009335  | NM_001007797       | nd           | arrestin domain containing 3                                                          | 0,3 | 1,49 |
| ENSRNOG00000017640  | NM_024139          | Chp          | calcium binding protein p22; similar to calcium binding protein P22                   | 0,2 | 0,55 |
| ENSRNOG00000019996  | NM_012716          | SLC16A1      | solute carrier family 16, member 1 (monocarboxylic acid transporter 1)                | 0,5 | 2,08 |
| ENSRNOG000000004100 | XM_343250          | TRIB1        | tribbles homolog 1 (Drosophila)                                                       | 0,1 | 0,00 |
| ENSRNOG000000009052 | XM_231739          | igf2bp3      | insulin-like growth factor 2 mRNA binding protein 3                                   | 0,5 | 2,08 |
| ENSRNOG00000020420  | NM_012624          | PKLR         | pyruvate kinase, liver and RBC                                                        | 0,5 | 2,28 |
| ENSRNOG00000024848  | NM_001008724.1     | Fga          | fibrinogen alpha chain (Fga), transcript variant 1                                    | 0,4 | 1,99 |
| ENSRNOG00000019834  | NM_001004082       | HSP90AB1     | similar to heat shock protein 1, beta; similar to Heat shock protein HSP 90-beta (HSI | 0,2 | 1,21 |
| ENSRNOG00000012189  | XM_341486          | Lect2        | leukocyte cell-derived chemotaxin 2                                                   | 0,2 | 1,21 |
| ENSRNOG00000007949  | NM_031546          | rgn          | regucalcin (senescence marker protein-30)                                             | 0,4 | 2,08 |
| ENSRNOG00000017397  | NM_001012159       | upf3a        | UPF3 regulator of nonsense transcripts homolog A (yeast)                              | 0,3 | 1,74 |
| ENSRNOG00000007128  | XM_342517          | Nol5a        | nucleolar protein 5A; similar to nucleolar protein 5A; similar to Nol5a               | 0,5 | 2,28 |
| ENSRNOG00000010247  | XM_230493          | nd           | similar to mKIAA1300 protein (predicted)                                              | 0,2 | 0,98 |
| ENSRNOG00000022529  | XM_341519          | nd           | ion transporter protein                                                               | 0,2 | 0,55 |
| ENSRNOG00000011552  | XM_226493          | MON1B        | similar to hypothetical protein 5031407H10 (predicted)                                | 0,1 | 0,00 |
| ENSRNOG00000009274  | NM_173308          | FUT11        | fucosyltransferase 11 (alpha (1,3) fucosyltransferase)                                | 0,5 | 2,28 |
| ENSRNOG00000023463  | XM_221404          | PARP9        | poly (ADP-ribose) polymerase family, member 9                                         | 0,4 | 1,74 |
| ENSRNOG00000022138  | NM_024351          | nd           | heat shock protein 8                                                                  | 0,3 | 1,74 |
| ENSRNOG00000026984  | XM_220957          | nd           | similar to CCT (chaperonin containing TCP-1) zeta subunit                             | 0,4 | 2,08 |
| ENSRNOG00000015502  | XM_215693          | Hiat1        | hippocampus abundant gene transcript 1                                                | 0,2 | 1,22 |
| ENSRNOG00000009565  | NM_053551          | PDK4         | pyruvate dehydrogenase kinase, isozyme 4                                              | 0,4 | 1,99 |
| ENSRNOG00000020928  | NM_019303          | Cyp2a1       | cytochrome P450 2A1 (hepatic steroid hydroxylase IIA1) gene                           | 0,3 | 0,99 |
| ENSRNOG00000019682  | NM_145781          | Timm13       | translocase of inner mitochondrial membrane 13 homolog (yeast)                        | 0,2 | 1,22 |
| ENSRNOG00000010309  | NM_031553          | NFYB         | nuclear transcription factor-Y beta                                                   | 0,2 | 1,48 |
| ENSRNOG00000022786  | XM_345525          | nd           | similar to ribosomal protein S12; 40S ribosomal protein S12                           | 0,3 | 1,74 |
| ENSRNOG00000011052  | XM_216152          | Gars         | glycyl-tRNA synthetase                                                                | 0,2 | 1,22 |
| ENSRNOG00000016390  | XM_214451          | EEF1E1       | eukaryotic translation elongation factor 1 epsilon 1                                  | 0,2 | 1,49 |
| ENSRNOG00000026645  | XM_003751433.1     | LOC100911429 | uncharacterized LOC100911429 (LOC100911429)                                           | 0,4 | 2,08 |
| ENSRNOG00000014055  | NM_053853          | NAT          | N-Acetyltransferase-2 (arylamine N-acetyltransferase); N-acetyltransferase 1          | 0,0 | 0,00 |
| ENSRNOG00000014254  | NM_031559          | Cpt1a        | carnitine palmitoyltransferase 1a, liver                                              | 0,5 | 3,05 |
| ENSRNOG00000016123  | XM_344576          | Rnf144b      | ring finger protein 144B                                                              | 0,1 | 0,00 |
| ENSRNOG00000019358  | NM_012689          | Esr1         | estrogen receptor 1                                                                   | 0,4 | 2,28 |
| ENSRNOG00000014242  | NM_001002286       | Mrgprc       | MAS-related G-protein coupled receptor, member C                                      | 0,3 | 1,99 |
| ENSRNOG00000016987  | NM_001271281.1     | Pstpip2      | proline-serine-threonine phosphatase-interacting protein 2 (Pstpip2)                  | 0,1 | 0,55 |
| ENSRNOG00000017120  | XM_214979          | ABHD2        | abhydrolase domain containing 2                                                       | 0,3 | 1,99 |
| ENSRNOG00000010198  | XM_234398          | nd           | cytosolic acyl CoA thioester hydrolase, inducible (Long chain acyl-CoA thioester hy   | 0,6 | 4,17 |
| ENSRNOG00000010270  | NM_019622          | Espn         | espin                                                                                 | 0,1 | 0,98 |
| ENSRNOG00000010543  | NM_001034150.1     | Srpr         | signal recognition particle receptor subunit alpha                                    | 0,4 | 2,28 |
| ENSRNOG000000004786 | NM_019623          | Cyp4f1       | cytochrome P450 4F1                                                                   | 0,2 | 1,69 |
| ENSRNOG00000017147  | NM_001024791.1     | Epn3         | epsin 3 (Epn3)                                                                        | 0,4 | 2,28 |
| ENSRNOG00000025312  | NM_001001364       | nd           | olfactory receptor gene Olr1051                                                       | 0,3 | 2,08 |
| ENSRNOG00000020922  | NM_138887          | hspb6        | heat shock protein, alpha-crystallin-related, B6                                      | 0,4 | 2,08 |
| ENSRNOG00000012141  | XM_234553          | xrcc3        | X-ray repair complementing defective repair in Chinese hamster cells 3                | 0,4 | 3,05 |
| ENSRNOG00000017330  | ENSRNOG00000017330 | Gm9905       | predicted gene 9905                                                                   | 0,2 | 1,22 |
| ENSRNOG000000008411 | XM_342531          | SEC23B       | Sec23 homolog B (S. cerevisiae)                                                       | 0,3 | 2,08 |

|                    |                    |              |                                                                                        |     |      |
|--------------------|--------------------|--------------|----------------------------------------------------------------------------------------|-----|------|
| ENSRNOG00000015767 | XM_577371.4        | LOC501945    | uncharacterized LOC501945 (RGD1559628)                                                 | 0,5 | 3,65 |
| ENSRNOG00000021364 | XM_002724803.2     | LOC691311    | hypothetical protein LOC691311 (LOC691311)                                             | 0,5 | 3,65 |
| ENSRNOG00000000221 | NM_212524          | ABHD5        | abhydrolase domain containing 5                                                        | 0,2 | 1,49 |
| ENSRNOG00000027644 | NM_001109325.1     | Krtap13-2    | keratin associated protein 13-2 (Krtap13-2), nuclear gene encoding mitochondrial p     | 0,2 | 1,74 |
| ENSRNOG00000017309 | XM_342944          | RGD1359529   | similar to chromosome 1 open reading frame 63                                          | 0,2 | 1,74 |
| ENSRNOG00000008250 | XR_146028.1        | LOC100363637 | nucleophosmin 1-like (LOC100363637)                                                    | 0,5 | 3,65 |
| ENSRNOG00000021273 | XM_345438          | CRLS1        | cardiolipin synthase 1                                                                 | 0,2 | 1,56 |
| ENSRNOG00000025111 | XM_218484          | NFKBID       | nuclear factor of kappa light polypeptide gene enhancer in B-cells inhibitor, delta    | 0,3 | 2,28 |
| ENSRNOG00000023159 | XM_221123          | Rp18         | similar to ribosomal protein S18                                                       | 0,2 | 1,69 |
| ENSRNOG00000007219 | NM_175761          | HSP90AA1     | similar to heat shock protein 1, alpha; heat shock protein 90, alpha (cytosolic), clas | 0,5 | 3,65 |
| ENSRNOG00000025140 | NM_001134957.1     | Zfat         | zinc finger and AT hook domain containing                                              | 0,3 | 2,08 |
| ENSRNOG00000023303 | NM_001011928       | DPEP2        | dipeptidase 2                                                                          | 0,4 | 2,52 |
| ENSRNOG00000010264 | XM_342601          | nd           | similar to bA305P22.2.1 (novel protein, isoform 1) (predicted)                         | 0,5 | 3,65 |
| ENSRNOG00000014160 | NM_012670          | TCP1         | t-complex 1                                                                            | 0,5 | 4,17 |
| ENSRNOG0000001466  | XM_217906          | LOC687842    | Cytochrome P450 2C24 (CYPIIC24) (P450-PROS2)                                           | 0,2 | 1,56 |
| ENSRNOG00000014812 | XM_218181          | Nalp12       | NACHT, leucine rich repeat and PYD containing 12                                       | 0,5 | 3,65 |
| ENSRNOG00000016595 | NM_024385          | hhex         | hematopoietically expressed homeobox                                                   | 0,5 | 3,65 |
| ENSRNOG00000022509 | XM_236813          | LOC301165    | similar to hypothetical protein 4932415M13                                             | 0,4 | 2,52 |
| ENSRNOG00000004517 | NM_178866          | Igf1         | insulin-like growth factor 1                                                           | 0,4 | 3,35 |
| ENSRNOG00000009857 | NM_001012014       | Ftsj3        | FtsJ homolog 3 (E. coli)                                                               | 0,5 | 3,65 |
| ENSRNOG00000011384 | XM_342344          | AIMP1        | small inducible cytokine subfamily E, member 1                                         | 0,3 | 2,08 |
| ENSRNOG00000011421 | XM_216529          | SMAP2        | small ArfGAP2                                                                          | 0,1 | 1,49 |
| ENSRNOG00000022396 | NM_001128065.1     | Rpl36a       | ribosomal protein L36a (Rpl36a)                                                        | 0,3 | 1,99 |
| ENSRNOG00000018453 | XM_235295          | nop2         | nucleolar protein 1; similar to nucleolar protein 1                                    | 0,3 | 2,08 |
| ENSRNOG00000012913 | NM_199372.2        | Eif4a1       | eukaryotic translation initiation factor 4A1 (Eif4a1)                                  | 0,3 | 2,08 |
| ENSRNOG00000016217 | NM_053689.2        | Gtpbp4       | GTP binding protein 4 (Gtpbp4)                                                         | 0,4 | 3,05 |
| Down-regulated     |                    |              |                                                                                        |     |      |
| ENSRNOG00000008239 | NM_001005893       | REPIN1       | replication initiator 1                                                                | 0,4 | 2,28 |
| ENSRNOG00000017133 | XM_225174          | LOC306766    | hypothetical LOC306766                                                                 | 0,2 | 1,82 |
| ENSRNOG00000000459 | NM_012708          | psmb9        | proteasome (prosome, macropain) subunit, beta type 9 (large multifunctional peptic     | 0,4 | 2,52 |
| ENSRNOG00000013484 | XM_347371          | GSTA3        | glutathione S-transferase A3                                                           | 0,5 | 3,05 |
| ENSRNOG00000000127 | XM_342926          | KPNA6        | karyopherin alpha 6 (importin alpha 7); similar to karyopherin (importin) alpha 6      | 0,4 | 2,52 |
| ENSRNOG00000013659 | XM_221043          | tex2         | testis expressed 2                                                                     | 0,3 | 2,08 |
| ENSRNOG00000006396 | NM_013026          | sdc1         | syndecan 1                                                                             | 0,3 | 1,82 |
| ENSRNOG00000014779 | NM_022265          | PDCD4        | programmed cell death 4                                                                | 0,3 | 2,08 |
| ENSRNOG00000007639 | XM_233250          | C8B          | complement component 8, beta polypeptide                                               | 0,5 | 3,05 |
| ENSRNOG00000005612 | NM_019287.2        | Apob         | apolipoprotein B (Apob)                                                                | 0,2 | 1,82 |
| ENSRNOG00000014886 | NM_001025034.1     | fam107b      | family with sequence similarity 107, member B                                          | 0,3 | 2,08 |
| ENSRNOG00000003253 | NM_022390          | QDPR         | quinoid dihydropteridine reductase                                                     | 0,2 | 1,49 |
| ENSRNOG00000016205 | XM_237327          | Rnf11l       | ring finger protein 11-like                                                            | 0,4 | 2,52 |
| ENSRNOG00000022074 | XM_345342.4        | C5           | similar to Complement C5 precursor (Hemolytic complement)                              | 0,5 | 3,05 |
| ENSRNOG00000016099 | NM_175582          | id4          | inhibitor of DNA binding 4                                                             | 0,2 | 1,82 |
| ENSRNOG00000009404 | NM_001127712.1     | Bco2         | beta-carotene oxygenase 2 (Bco2)                                                       | 0,3 | 2,52 |
| ENSRNOG00000004405 | NM_012723          | PIGR         | polymeric immunoglobulin receptor                                                      | 0,5 | 3,05 |
| ENSRNOG00000005437 | NM_031714          | Hrsp12       | heat-responsive protein 12                                                             | 0,4 | 2,08 |
| ENSRNOG00000025685 | XM_003753726.1     | Pkp4         | plakophilin 4, transcript variant 2 (Pkp4)                                             | 0,3 | 1,82 |
| ENSRNOG00000002052 | NM_022543.2        | Ccdc80       | coiled-coil domain containing 80 (Ccdc80)                                              | 0,2 | 1,82 |
| ENSRNOG00000002610 | NM_152790          | carhsp1      | calcium regulated heat stable protein 1                                                | 0,3 | 1,82 |
| ENSRNOG00000003709 | NM_021593          | kmo          | kynurenine 3-monooxygenase (kynurenine 3-hydroxylase)                                  | 0,3 | 1,82 |
| ENSRNOG00000017381 | NM_019369.2        | Itih4        | inter-alpha-inhibitor H4 heavy chain                                                   | 0,4 | 2,08 |
| ENSRNOG00000002136 | NM_001128311.1     | Abcg3        | ATP-binding cassette, subfamily G (WHITE), member 3 (Abcg3)                            | 0,2 | 1,56 |
| ENSRNOG00000002280 | NM_001173339.1     | Sh3bgrl      | SH3 domain binding glutamic acid-rich protein like                                     | 0,2 | 1,49 |
| ENSRNOG00000011630 | NM_017135          | AK3L1        | adenylate kinase 3-like 1                                                              | 0,0 | 0,00 |
| ENSRNOG00000020684 | XM_213484          | vat1         | vesicle amine transport protein 1 homolog (T californica)                              | 0,4 | 2,08 |
| ENSRNOG00000018553 | NM_001008369       | PITPNM1      | phosphatidylinositol transfer protein, membrane-associated 1                           | 0,3 | 1,82 |
| ENSRNOG00000017799 | ENSRNOG00000017799 | LOC685895    | similar to Thymidine kinase, cytosolic                                                 | 0,2 | 1,56 |
| ENSRNOG00000014571 | NM_001047111.2     | DBNDD2       | dysbindin (dystrobrevin binding protein 1) domain containing 2                         | 0,4 | 2,28 |
| ENSRNOG00000011419 | NM_031057          | Aldh6a1      | aldehyde dehydrogenase 6 family, member A1                                             | 0,5 | 2,52 |
| ENSRNOG00000000304 | NM_031812          | CD164        | CD164 molecule, sialomucin                                                             | 0,2 | 1,49 |
| ENSRNOG00000019556 | XM_342760          | CD9          | CD9 molecule                                                                           | 0,6 | 4,17 |
| ENSRNOG00000005195 | NM_012837          | Cst3         | cystatin C                                                                             | 0,3 | 1,82 |
| ENSRNOG00000005447 | XM_346895          | LOC688105    | hypothetical protein LOC688105; LOC360590                                              | 0,4 | 2,08 |
| ENSRNOG00000024170 | NM_138888          | phf5a        | PHD finger protein 5A                                                                  | 0,6 | 4,17 |
| ENSRNOG00000014652 | NM_019158          | AQP8         | aquaporin 8                                                                            | 0,2 | 1,49 |

|                     |                |              |                                                                                  |     |      |
|---------------------|----------------|--------------|----------------------------------------------------------------------------------|-----|------|
| ENSRNOG00000007697  | XM_233251      | C8A          | complement component 8, alpha polypeptide                                        | 0,3 | 1,82 |
| ENSRNOG00000014129  | NM_001106355.1 | Hoga1        | 4-hydroxy-2-oxoglutarate aldolase 1 (Hoga1), nuclear gene encoding mitochondrial | 0,3 | 1,82 |
| ENSRNOG00000001921  | NM_001013864.1 | Lpp          | LIM domain containing preferred translocation partner in lipoma (Lpp)            | 0,3 | 1,82 |
| ENSRNOG000000003941 | NM_057114.1    | Prdx1        | peroxiredoxin 1 (Prdx1)                                                          | 0,4 | 1,99 |
| ENSRNOG000000009488 | NM_012942      | Cyp7a1       | cytochrome P450, family 7, subfamily a, polypeptide 1                            | 0,6 | 3,65 |
| ENSRNOG00000014504  | NM_013123      | Il1r1        | interleukin 1 receptor, type I                                                   | 0,4 | 2,28 |
| ENSRNOG00000020947  | NM_001004083   | EGLN2        | EGL nine homolog 2 (C. elegans)                                                  | 0,5 | 3,05 |
| ENSRNOG00000017056  | NM_001106397.1 | LOC684681    | microtubule associated monooxygenase, calponin and LIM domain containing 1 (Mic  | 0,4 | 2,08 |
| ENSRNOG00000014515  | XM_227618      | CDC14A       | CDC14 cell division cycle 14 homolog A (S. cerevisiae)                           | 0,3 | 1,99 |
| ENSRNOG00000027129  | NM_001109356.1 | Sdr16c6      | short chain dehydrogenase/reductase family 16C, member 6 (Sdr16c6)               | 0,1 | 1,21 |
| ENSRNOG00000015491  | NM_001013152   | RCL1         | RNA terminal phosphate cyclase-like 1                                            | 0,2 | 1,49 |
| ENSRNOG00000004725  | NM_012552      | CELA1        | chymotrypsin-like elastase family, member 1                                      | 0,3 | 1,82 |
| ENSRNOG00000001229  | XM_241632      | COL18A1      | collagen, type XVIII, alpha 1                                                    | 0,3 | 1,82 |
| ENSRNOG00000022360  | NM_001177819.1 | LOC100362110 | LRRGT00155-like (LOC100362110)                                                   | 0,6 | 4,17 |
| ENSRNOG00000021366  | NM_001166679.1 | Tas2r116     | Taste receptor, type 2, member 116 (Tas2r116)                                    | 0,3 | 1,82 |
| ENSRNOG00000016526  | XM_226112      | DSG2         | desmoglein 2                                                                     | 0,1 | 1,21 |
| ENSRNOG00000010389  | NM_133583      | Ndrp2        | N-myc downstream regulated gene 2                                                | 0,4 | 1,99 |
| ENSRNOG00000000981  | NM_031541      | SCARB1       | scavenger receptor class B, member 1                                             | 0,4 | 2,08 |
| ENSRNOG00000004062  | NM_012516      | C4BPA        | complement component 4 binding protein, alpha                                    | 0,3 | 1,82 |
| ENSRNOG00000000028  | NM_053347      | NDE1         | nudE nuclear distribution gene E homolog 1 (A. nidulans)                         | 0,4 | 2,08 |
| ENSRNOG00000017123  | NM_012512      | B2M          | beta-2 microglobulin                                                             | 0,6 | 3,65 |
| ENSRNOG00000000068  | XM_232413      | PPP2R5A      | protein phosphatase 2, regulatory subunit B', alpha isoform                      | 0,0 | 0,00 |
| ENSRNOG00000016955  | XM_214513      | fam188a      | similar to RIKEN cDNA 2310047O13                                                 | 0,2 | 1,52 |
| ENSRNOG00000016691  | XM_345167      | RGD1306809   | similar to hypothetical protein FLJ30596                                         | 0,2 | 1,56 |
| ENSRNOG00000010633  | NM_012820      | Acsf1        | acyl-CoA synthetase long-chain family member 1                                   | 0,3 | 1,69 |
| ENSRNOG00000002304  | XM_001079369.3 | Tnfrsf13b    | tumor necrosis factor receptor superfamily, member 13b                           | 0,2 | 1,22 |
| ENSRNOG00000011913  | NM_012532      | CP           | ceruloplasmin                                                                    | 0,4 | 1,82 |
| ENSRNOG00000003326  | XM_222526      | RRN3         | RRN3 RNA polymerase I transcription factor homolog (S. cerevisiae)               | 0,4 | 1,99 |
| ENSRNOG00000012440  | NM_053307      | msrA         | methionine sulfoxide reductase A                                                 | 0,1 | 0,31 |
| ENSRNOG00000021200  | NM_001012080   | hfe2         | hemochromatosis type 2 (juvenile) (human homolog)                                | 0,4 | 2,08 |
| ENSRNOG00000001980  | NM_001004271   | Ugt2b36      | UDP glucuronosyltransferase 2 family, polypeptide B36                            | 0,1 | 0,55 |
| ENSRNOG00000000936  | NM_012748      | stx2         | syntaxin 2                                                                       | 0,3 | 1,82 |
| ENSRNOG00000009440  | NM_012770      | GUCY1B2      | guanylate cyclase 1, soluble, beta 2                                             | 0,1 | 0,00 |
| ENSRNOG00000002208  | XM_223229      | SHROOM3      | shroom family member 3                                                           | 0,1 | 0,98 |
| ENSRNOG00000008374  | XM_341249      | NIPSNAP1     | 4-nitrophenylphosphatase domain and non-neuronal SNAP25-like protein homolog     | 0,3 | 1,69 |
| ENSRNOG00000008781  | XM_216756      | RGD1310769   | similar to HSPC288                                                               | 0,4 | 2,28 |
| ENSRNOG00000014806  | NM_001134751.1 | Pnkd         | paroxysmal nonkinesigenic dyskinesia (Pnkd), nuclear gene encoding mitochondri   | 0,4 | 1,99 |
| ENSRNOG00000003662  | NM_024381      | GK           | glycerokinase (GK)                                                               | 0,1 | 0,55 |
| ENSRNOG00000005669  | NM_001009662   | Car8         | carbonic anhydrase 8                                                             | 0,3 | 1,56 |
| ENSRNOG00000017305  | NM_017248.1    | Hnrnpa1      | nuclear ribonucleoprotein A1                                                     | 0,5 | 2,52 |
| ENSRNOG00000004502  | NM_001271212.1 | hal          | autophagy related 13                                                             | 0,2 | 1,60 |
| ENSRNOG00000012216  | NM_053802.1    | tgfbf1       | transforming growth factor, beta induced                                         | 0,2 | 1,56 |
| ENSRNOG00000003515  | NM_012844.3    | ephX1        | epoxide hydrolase 1, microsomal, transcript variant 2,                           | 0,5 | 2,04 |
| ENSRNOG00000018899  | XM_345342      | C5           | complement component 5                                                           | 0,4 | 1,76 |
| ENSRNOG00000025555  | NM_001012359   | nd           | angiogenin ribonuclease 2                                                        | 0,3 | 1,82 |
| ENSRNOG000000027520 | XM_343776      | PLS3         | plastin 3 (T-isoform)                                                            | 0,3 | 1,69 |
| ENSRNOG00000023708  | NM_001039008.1 | Tmem176a     | transmembrane protein 176A                                                       | 0,1 | 0,55 |
| ENSRNOG00000002240  | NM_001012017   | DIRC2        | disrupted in renal carcinoma 2 (human)                                           | 0,1 | 0,31 |
| ENSRNOG00000025460  | NM_001271215.1 | TMEM71       | transmembrane protein 71                                                         | 0,3 | 1,82 |
| ENSRNOG00000005487  | NM_001007750   | CHPT1        | choline phosphotransferase 1                                                     | 0,3 | 1,69 |
| ENSRNOG00000014540  | XM_001075984.2 | RGD1309621   | similar to hypothetical protein FLJ10652 (RGD1309621)                            | 0,5 | 2,28 |
| ENSRNOG00000013291  | NM_031839      | Cyp2c23      | cytochrome P450 2C23                                                             | 0,3 | 1,69 |
| ENSRNOG00000000025  | NM_131906      | nd           | solute carrier family 21 member 5 (sodium-independent organic anion transporting | 0,4 | 1,99 |
| ENSRNOG00000019691  | NM_053425      | Ccs          | copper chaperone for superoxide dismutase                                        | 0,2 | 1,22 |
| ENSRNOG00000017777  | NM_017201      | ahcY         | similar to Adenosylhomocysteinase (S-adenosyl-L-homocysteine hydrolase) (AdoH    | 0,1 | 0,98 |
| ENSRNOG00000027466  | NM_001024335.1 | CD27         | CD27 molecule                                                                    | 0,5 | 2,52 |
| ENSRNOG00000004284  | NM_017258      | btg1         | B-cell translocation gene 1, anti-proliferative                                  | 0,4 | 1,82 |
| ENSRNOG00000020992  | NM_080892      | SELENBP1     | selenium binding protein 1                                                       | 0,5 | 2,28 |
| ENSRNOG00000016967  | NM_053301      | HFE          | hemochromatosis                                                                  | 0,2 | 1,21 |
| ENSRNOG00000013302  | NM_001009920   | nd           | glutathione S-transferase YC-2 (chain 2) (GST YC2) (GST class-alpha)             | 0,4 | 1,82 |
| ENSRNOG00000007947  | XM_342702      | Fam13a1      | family with sequence similarity 13, member A1                                    | 0,2 | 1,21 |
| ENSRNOG00000012971  | NM_130409      | nd           | Complement factor H-related protein                                              | 0,3 | 1,56 |
| ENSRNOG00000020950  | NM_001100739.1 | SYVN1        | synovial apoptosis inhibitor 1, synoviolin                                       | 0,4 | 1,82 |
| ENSRNOG00000012475  | NM_001004242   | prp5         | proline rich 5 (renal)                                                           | 0,2 | 1,22 |
| ENSRNOG00000016349  | NM_017084      | Gnmt         | glycine N-methyltransferase                                                      | 0,4 | 1,99 |

|                     |                |            |                                                                                                       |     |      |
|---------------------|----------------|------------|-------------------------------------------------------------------------------------------------------|-----|------|
| ENSRNOG00000012442  | XM_218855      | RGD1305254 | similar to transmembrane protein 2                                                                    | 0,1 | 0,00 |
| ENSRNOG00000002289  | NM_020081      | ildr1      | immunoglobulin-like domain containing receptor 1                                                      | 0,2 | 1,21 |
| ENSRNOG00000014876  | XM_237521      | LPIN2      | lipin 2                                                                                               | 0,6 | 3,65 |
| ENSRNOG00000003307  | XM_344744      | gcdH       | glutaryl-Coenzyme A dehydrogenase                                                                     | 0,5 | 2,28 |
| ENSRNOG00000023060  | XM_227742      | RpL29      | 60S ribosomal protein L29-like (LOC295487)                                                            | 0,3 | 1,49 |
| ENSRNOG00000019832  | XM_219691      | Bbs1       | Bardet-Biedl syndrome 1 homolog (human)                                                               | 0,3 | 1,69 |
| ENSRNOG00000019982  | XM_214838      | Ethe1      | ethylmalonic encephalopathy 1                                                                         | 0,7 | 3,65 |
| ENSRNOG00000019466  | XM_231089      | AGPAT2     | 1-acylglycerol-3-phosphate O-acyltransferase 2 (lysophosphatidic acid acyltransferase 2)              | 0,3 | 1,56 |
| ENSRNOG00000027846  | XM_225391      | Hist1h4b   | histone cluster 1, H4b (Hist1h4b)                                                                     | 0,5 | 2,28 |
| ENSRNOG00000008498  | XM_216288      | GABARAPL1  | GABA(A) receptor-associated protein like 1                                                            | 0,3 | 1,49 |
| ENSRNOG00000015032  | XM_001059222.3 | TEX13B     | testis expressed 13B                                                                                  | 0,4 | 1,82 |
| ENSRNOG00000002210  | NM_001004209   | HSD17B11   | hydroxysteroid (17-beta) dehydrogenase 11                                                             | 0,3 | 1,49 |
| ENSRNOG00000002039  | NM_001271410.1 | Evi5       | ecotropic viral integration site 5                                                                    | 0,4 | 1,82 |
| ENSRNOG00000004125  | NM_016995      | C4BPB      | complement component 4 binding protein, beta                                                          | 0,4 | 1,82 |
| ENSRNOG00000018074  | NM_133295.3    | Ces1d      | carboxylesterase 1D                                                                                   | 0,7 | 3,65 |
| ENSRNOG00000018967  | XM_002728606.2 | LOC690751  | WD repeat-containing protein 59-like (LOC690751)                                                      | 0,4 | 1,82 |
| ENSRNOG00000011971  | NM_138900      | C1s        | complement component 1, s subcomponent                                                                | 0,4 | 1,82 |
| ENSRNOG00000016271  | NM_001006963   | itm2b      | integral membrane protein 2B                                                                          | 0,1 | 0,00 |
| ENSRNOG00000019532  | NM_001004221   | MGC93975   | similar to 2310044H10Rik protein                                                                      | 0,6 | 2,52 |
| ENSRNOG00000015020  | NM_031510      | IDH1       | isocitrate dehydrogenase 1 (NADP+), soluble                                                           | 0,3 | 1,49 |
| ENSRNOG00000005599  | NM_023103      | A1i3       | alpha-1-inhibitor III                                                                                 | 0,5 | 2,28 |
| ENSRNOG00000024777  | NM_175760      | nd         | cytochrome P450, family 4, subfamily a, polypeptide 14                                                | 0,6 | 3,05 |
| ENSRNOG00000013704  | NM_017072.1    | Cps1       | carbamoyl-phosphate synthetase 1 (Cps1), nuclear gene encoding mitochondrial protein                  | 0,2 | 0,98 |
| ENSRNOG00000000961  | XM_001073476.3 | Glt1d1     | glycosyltransferase 1 domain containing 1                                                             | 0,1 | 0,00 |
| ENSRNOG00000009582  | XM_003749692.1 | RPE65      | uncharacterized LOC100911535                                                                          | 0,3 | 1,56 |
| ENSRNOG00000018542  | XM_342960      | nd         | taste receptor, type 1, member 2                                                                      | 0,5 | 2,08 |
| ENSRNOG00000002981  | NM_031601      | CACNA1G    | calcium channel, voltage-dependent, T type, alpha 1G subunit                                          | 0,4 | 1,69 |
| ENSRNOG00000015774  | NM_001192002.1 | Mreg       | melanoregulin                                                                                         | 0,4 | 1,82 |
| ENSRNOG00000018740  | NM_001039549.1 | Ugt1a      | UDP glucuronosyltransferase 1 family, polypeptide A5                                                  | 0,3 | 1,63 |
| ENSRNOG00000014560  | NM_030826.3    | Gpx1       | glutathione peroxidase 1                                                                              | 0,5 | 2,08 |
| ENSRNOG00000023491  | NM_001013185.1 | Adck3      | adck domain containing kinase 3 (Adck3), nuclear gene encoding mitochondrial protein                  | 0,4 | 1,82 |
| ENSRNOG00000000445  | NM_031504.3    | C4a        | complement component 4A (Rodgers blood group) (C4a),                                                  | 0,4 | 1,69 |
| ENSRNOG00000001834  | XM_213563      | Fam128b    | family with sequence similarity 128, member B                                                         | 0,6 | 2,52 |
| ENSRNOG00000019503  | NM_001011916   | Rec8       | REC8 homolog (yeast)                                                                                  | 0,2 | 1,21 |
| ENSRNOG00000015660  | NM_031350      | pex3       | peroxisomal biogenesis factor 3                                                                       | 0,2 | 0,00 |
| ENSRNOG00000005906  | NM_031561      | FAT/CD36   | fatty acid translocase/CD36 (thrombospondin receptor)                                                 | 0,4 | 1,82 |
| ENSRNOG00000004009  | NM_057155      | XPNPEP2    | X-prolyl aminopeptidase (aminopeptidase P) 2, membrane-bound                                          | 0,4 | 1,69 |
| ENSRNOG00000000302  | XM_215423      | sesn1      | sestrin 1                                                                                             | 0,4 | 1,69 |
| ENSRNOG00000019094  | NM_177426.1    | Gstm2      | Glutathione S-transferase Mu 2                                                                        | 0,3 | 1,22 |
| ENSRNOG00000014493  | XM_231193      | Golga1     | golgi autoantigen, golgin subfamily a, 1                                                              | 0,4 | 1,82 |
| ENSRNOG00000003370  | NM_013078      | OTC        | ornithine carbamoyltransferase                                                                        | 0,4 | 1,69 |
| ENSRNOG00000016737  | NM_001130077.1 | Tcerg1l    | transcription elongation regulator 1-like                                                             | 0,7 | 3,05 |
| ENSRNOG00000000469  | NM_001008841.2 | RT1-CE3    | RT1 class I, locus CE3 (RT1-CE3)                                                                      | 0,4 | 1,82 |
| ENSRNOG000000004821 | XM_235312      | SNTB1      | syntrophin, basic 1                                                                                   | 0,2 | 1,21 |
| ENSRNOG00000006653  | NM_130748      | Slc38a4    | solute carrier family 38, member 4                                                                    | 0,1 | 0,00 |
| ENSRNOG00000018267  | NM_001012134   | b3gnt7     | UDP-GlcNAc:betaGal beta-1,3-N-acetylglucosaminyltransferase 7                                         | 0,5 | 1,82 |
| ENSRNOG00000023599  | NM_024157      | Cfi        | complement factor I                                                                                   | 0,3 | 1,49 |
| ENSRNOG00000012464  | NM_019286      | adh1       | alcohol dehydrogenase 1 (class I)                                                                     | 0,6 | 2,35 |
| ENSRNOG00000023142  | XM_223474      | nd         | similar to aldehyde dehydrogenase family 9, subfamily A1; 4-trimethylaminobutylaldehyde dehydrogenase | 0,3 | 1,21 |
| ENSRNOG00000005905  | NM_017031      | Pde4b      | phosphodiesterase 4B, cAMP specific                                                                   | 0,2 | 0,31 |
| ENSRNOG00000017808  | NM_053536      | klf15      | Kruppel-like factor 15                                                                                | 0,3 | 1,21 |
| ENSRNOG00000014700  | NM_001005546   | Ttc36      | tetratricopeptide repeat domain 36                                                                    | 0,3 | 1,21 |
| ENSRNOG00000012391  | XM_575155.5    | Ttn        | titin (Ttn)                                                                                           | 0,2 | 0,55 |
| ENSRNOG00000005159  | XM_001072719.3 | RGD1308133 | similar to RIKEN cDNA 1700010C24 (RGD1308133)                                                         | 0,9 | 4,17 |
| ENSRNOG00000001806  | NM_053348      | FetuB      | fetuin B                                                                                              | 0,4 | 1,69 |
| ENSRNOG00000016386  | NM_031975      | PTMS       | parathyrosin                                                                                          | 0,4 | 1,56 |
| ENSRNOG00000021004  | NM_001106261.2 | Rasip1     | Ras interacting protein 1 (Rasip1)                                                                    | 0,6 | 2,08 |
| ENSRNOG00000011200  | NM_030850      | bhmT       | betaine-homocysteine methyltransferase                                                                | 0,7 | 2,28 |
| ENSRNOG00000005220  | XM_216738      | SYNE2      | spectrin repeat containing, nuclear envelope 2                                                        | 0,4 | 1,69 |
| ENSRNOG00000020776  | NM_022389      | DHCR7      | 7-dehydrocholesterol reductase                                                                        | 0,6 | 2,08 |
| ENSRNOG00000018522  | NM_078623      | Echs1      | enoyl Coenzyme A hydratase, short chain, 1, mitochondrial                                             | 0,5 | 1,82 |
| ENSRNOG00000001338  | NM_017233      | hpd        | 4-hydroxyphenylpyruvate dioxygenase                                                                   | 0,3 | 1,21 |
| ENSRNOG00000023587  | XM_341557      | DHTKD1     | dehydrogenase E1 and transketolase domain containing 1                                                | 0,3 | 0,98 |
| ENSRNOG00000007793  | NM_173322      | PNRC1      | proline-rich nuclear receptor coactivator 1                                                           | 0,4 | 1,49 |
| ENSRNOG00000014739  | NM_173109      | WFDC2      | WAP four-disulfide core domain 2                                                                      | 0,1 | 0,74 |

|                     |                |              |                                                                                      |     |      |
|---------------------|----------------|--------------|--------------------------------------------------------------------------------------|-----|------|
| ENSRNOG00000021338  | NM_178021      | TMEM132A     | transmembrane protein 132A                                                           | 0,5 | 1,69 |
| ENSRNOG00000007507  | XM_231524      | nd           | aminoadipate-semialdehyde synthase (predicted)                                       | 0,8 | 2,52 |
| ENSRNOG000000002783 | NM_001012027   | serpinc1     | serine (or cysteine) peptidase inhibitor, clade C (antithrombin), member 1           | 0,6 | 1,99 |
| ENSRNOG000000001344 | NM_032416      | ALDH2        | aldehyde dehydrogenase 2 family (mitochondrial)                                      | 0,7 | 2,28 |
| ENSRNOG000000006472 | NM_021863      | Hspa2        | heat shock protein 2                                                                 | 0,9 | 3,65 |
| ENSRNOG000000008465 | NM_134390      | TMEM176B     | transmembrane protein 176B                                                           | 0,1 | 0,00 |
| ENSRNOG000000002207 | XM_223381      | Guf1         | GUF1 GTPase homolog (S. cerevisiae)                                                  | 0,5 | 1,69 |
| ENSRNOG000000005861 | NM_017080      | HSD11B1      | hydroxysteroid 11-beta dehydrogenase 1                                               | 0,4 | 1,49 |
| ENSRNOG000000018494 | NM_001012072   | Ppp1r3c      | protein phosphatase 1, regulatory (inhibitor) subunit 3C                             | 0,7 | 2,08 |
| ENSRNOG000000016460 | NM_053021      | clu          | clusterin                                                                            | 0,5 | 1,69 |
| ENSRNOG000000010714 | NM_172010      | FGL1         | fibrinogen-like 1                                                                    | 0,6 | 1,82 |
| ENSRNOG000000003443 | XM_222473      | Klf1         | Kruppel-like factor 1 (erythroid)                                                    | 0,8 | 2,52 |
| ENSRNOG000000008638 | NM_001025065.1 | Angpt 3      | angiopoietin-like 3                                                                  | 0,6 | 1,82 |
| ENSRNOG000000000453 | NM_001004084   | nd           | class II MHC RT1.D(N) beta chain precursor                                           | 0,3 | 0,91 |
| ENSRNOG000000020983 | XM_001078193.3 | LOC690930    | membrane-spanning 4-domains subfamily A member 6C-like, transcript variant 1 (L      | 0,5 | 1,69 |
| ENSRNOG000000008364 | NM_012520      | cat          | catalase                                                                             | 0,2 | 0,00 |
| ENSRNOG000000006859 | XR_146922.1    | LOC100909424 | uncharacterized LOC100909424 (LOC100909424)                                          | 0,5 | 1,56 |
| ENSRNOG000000008837 | NM_013157      | ASS1         | argininosuccinate synthetase 1                                                       | 0,5 | 1,69 |
| ENSRNOG000000017891 | NM_134380      | nd           | integral membrane transport protein UST5R                                            | 0,8 | 2,52 |
| ENSRNOG000000004147 | XM_221100      | Abca8a       | ATP-binding cassette, sub-family A (ABC1), member 8a                                 | 0,2 | 0,31 |
| ENSRNOG000000011351 | NM_012860      | mat1a        | methionine adenosyltransferase I, alpha                                              | 0,2 | 0,00 |
| ENSRNOG000000007457 | NM_199093      | SERPING1     | serine (or cysteine) peptidase inhibitor, clade G, member 1                          | 0,6 | 1,82 |
| ENSRNOG000000012123 | NM_017126      | FDX1         | ferredoxin 1                                                                         | 0,4 | 1,49 |
| ENSRNOG000000012929 | XM_220736      | WSB1         | WD repeat and SOCS box-containing 1                                                  | 0,6 | 1,82 |
| ENSRNOG000000005604 | NM_019287      | APOB         | apolipoprotein B                                                                     | 0,4 | 1,49 |
| ENSRNOG000000001827 | NM_022257      | masp1        | mannan-binding lectin serine peptidase 1                                             | 0,2 | 0,00 |
| ENSRNOG000000006893 | XM_231833      | Ppm1k        | protein phosphatase 1K (PP2C domain containing)                                      | 0,2 | 0,00 |
| ENSRNOG000000004302 | NM_012619      | pah          | phenylalanine hydroxylase                                                            | 0,5 | 1,69 |
| ENSRNOG000000013736 | NM_057146      | C9           | complement component 9                                                               | 0,2 | 0,00 |
| ENSRNOG000000001983 | XM_223299      | Ugt2b10      | UDP glucuronosyltransferase 2 family, polypeptide B10 (Ugt2b10)                      | 0,2 | 0,00 |
| ENSRNOG000000020817 | NM_012693      | Cyp2a2       | cytochrome P450, subfamily 2A, polypeptide 1                                         | 0,3 | 0,00 |
| ENSRNOG000000021314 | NM_019238      | FDFT1        | farnesyl diphosphate farnesyl transferase 1                                          | 0,5 | 1,56 |
| ENSRNOG000000000443 | NM_031504.3    | C4a          | complement component 4A (Rodgers blood group) (C4a)                                  | 0,9 | 2,05 |
| ENSRNOG000000013956 | NM_134467      | Rnf38        | ring finger protein 38                                                               | 0,4 | 0,98 |
| ENSRNOG000000012787 | XM_346288      | TMEM164      | transmembrane protein 164                                                            | 0,6 | 1,69 |
| ENSRNOG000000027445 | NM_022392.1    | Insig1       | insulin induced gene 1 (Insig1)                                                      | 0,8 | 1,82 |
| ENSRNOG000000001856 | NM_001109612.1 | Rps4y2       | ribosomal protein S4, Y-linked 2 (Rps4y2)                                            | 0,6 | 1,69 |
| ENSRNOG000000005341 | XM_229938      | UPP2         | uridine phosphorylase 2                                                              | 0,6 | 1,69 |
| ENSRNOG000000028661 | XM_230900      | CTCFL        | CCCTC-binding factor (zinc finger protein)-like                                      | 0,7 | 1,82 |
| ENSRNOG000000002237 | XM_340994      | nd           | similar to Protein disulfide isomerase-related                                       | 0,6 | 1,56 |
| ENSRNOG000000009301 | NM_001010921.1 | Gsta5        | glutathione S-transferase alpha 5 (Gsta5)                                            | 0,6 | 1,56 |
| ENSRNOG000000018937 | NM_031154      | Gstm7        | glutathione S-transferase mu 3; glutathione S-transferase mu 4; glutathione S-trans  | 0,2 | 0,00 |
| ENSRNOG000000020928 | NM_019303      | Cyp2a1       | cytochrome P450 IIA1 (hepatic steroid hydroxylase IIA1) gene                         | 0,6 | 1,45 |
| ENSRNOG000000013279 | NM_031841      | Scd2         | stearoyl-coenzyme A desaturase 4 (Scd2)                                              | 0,8 | 1,82 |
| ENSRNOG000000013765 | NM_001000689   | nd           | olfactory receptor gene Olr34                                                        | 0,6 | 1,49 |
| ENSRNOG000000001990 | NM_173295      | Ugt2b1       | UDP glucuronosyltransferase 2 family, polypeptide B17                                | 0,5 | 1,22 |
| ENSRNOG000000028638 | XM_221655      | Il10rb       | interleukin 10 receptor, beta                                                        | 0,6 | 1,49 |
| ENSRNOG000000000978 | NM_013105      | nd           | cytochrome P450, subfamily 3A, polypeptide 3                                         | 0,8 | 1,94 |
| ENSRNOG000000011612 | NM_022403      | tdo2         | tryptophan 2,3-dioxygenase                                                           | 0,3 | 0,00 |
| ENSRNOG000000016841 | XM_226351      | GPT2         | glutamic pyruvate transaminase (alanine aminotransferase) 2                          | 0,2 | 0,00 |
| ENSRNOG000000010658 | NM_017074      | CTH          | cystathionase (cystathionine gamma-lyase)                                            | 0,6 | 1,22 |
| ENSRNOG000000014726 | XM_219392      | ACSM4        | acyl-CoA synthetase medium-chain family member 4                                     | 0,5 | 0,55 |
| ENSRNOG000000019481 | NM_031241      | Cyp8b1       | cytochrome P450, family 8, subfamily b, polypeptide 1                                | 0,3 | 0,00 |
| ENSRNOG000000017619 | NM_022407      | aldh1a1      | aldehyde dehydrogenase 1 family, member A1                                           | 0,4 | 0,61 |
| ENSRNOG000000018735 | NM_001134510.1 | RGD1561161   | similar to BC067074 protein (RGD1561161)                                             | 0,4 | 0,00 |
| ENSRNOG000000011016 | NM_001134686.2 | Slc7a2       | solute carrier family 7 (cationic amino acid transporter, y+ system), member 2 (Slc7 | 0,6 | 0,98 |
| ENSRNOG000000016807 | NM_022521      | OAT          | ornithine aminotransferase (gyrate atrophy)                                          | 0,4 | 0,00 |
| ENSRNOG000000018237 | NM_138974      | GSTP1        | glutathione-S-transferase, pi 1                                                      | 0,7 | 1,21 |
| ENSRNOG000000009921 | XM_216782      | serpina3m    | serine (or cysteine) proteinase inhibitor, clade A, member 3M                        | 1,2 | 2,08 |
| ENSRNOG000000028616 | NM_198780      | PCK1         | phosphoenolpyruvate carboxykinase 1 (soluble)                                        | 0,7 | 0,98 |
| ENSRNOG000000001831 | NM_001107896.1 | Ppfibp1      | PTPRF interacting protein, binding protein 1 (liprin beta 1) (Ppfibp1)               | 0,9 | 1,49 |
| ENSRNOG000000012458 | NM_031543      | CYP2E1       | cytochrome P450 2E1                                                                  | 0,5 | 0,00 |
| ENSRNOG000000015740 | XM_341581      | RNF125       | ring finger protein 125                                                              | 0,2 | 0,00 |
| ENSRNOG000000001809 | NM_133428      | HRG          | histidine-rich glycoprotein; similar to histidine-rich glycoprotein                  | 0,3 | 0,00 |
| ENSRNOG000000008371 | NM_013144.1    | IGFBP1       | insulin-like growth factor binding protein 1 (Igfbp1)                                | 1,4 | 2,28 |

|                    |              |           |                                                                                      |     |      |
|--------------------|--------------|-----------|--------------------------------------------------------------------------------------|-----|------|
| ENSRNOG00000018764 | XM_224719    | B3gnt3    | UDP-GlcNAc:betaGal beta-1,3-N-acetylglucosaminyltransferase 3                        | 0,8 | 0,98 |
| ENSRNOG00000009438 | NM_133617.2  | Serpina10 | serpin peptidase inhibitor, clade A (alpha-1 antiproteinase, antitrypsin), member 10 | 0,2 | 0,00 |
| ENSRNOG00000013464 | NM_012674.2  | Spink3    | serine peptidase inhibitor, Kazal type 3 (Spink3)                                    | 0,6 | 0,00 |
| ENSRNOG00000001957 | NM_001007718 | SULT1E1   | sulfotransferase family 1E, estrogen-preferring, member 1; estrogen sulfotransferase | 0,7 | 0,00 |
| ENSRNOG00000000768 | NM_053299    | UBD       | ubiquitin D                                                                          | 1,8 | 2,08 |
| ENSRNOG00000013410 | NM_152936.1  | Spink1    | serine peptidase inhibitor, Kazal type 1 (Spink1)                                    | 0,6 | 0,00 |
| ENSRNOG00000010079 | NM_019292    | CAR3      | carbonic anhydrase 3                                                                 | 0,7 | 0,00 |

**Table S4. Hepatic genes regulated by GH in E2-treated hypothyroid-orchidectomized rats.** The administrations of vehicle (TXOX) or E2 plus GH (TXOXE2GH) in TXOX rats were described in Material and Methods. Then, differently expressed genes in the livers were identified by DNA microarrays. The analysis is based on the SAM statistical technique and differentially-expressed genes were discovered using a FDR less than 5% and a mean ratio of  $\log_2 > |0.58|$ . The table shows ENSEMBL gene ID, gene symbol, gene description, R (TXOXE2GH/TXOX), SD, and q(%).
