# Supplementary material
Source: publisher figshare collection journal article supplement (https://plos.figshare.com/articles/dataset/_/1022100)
Supplement: Supplementary file [file 1]

| ENSEMBL             | Unigene/Refseq | Symbol       | Gene description                                                                                                    | R         |      | q(%) |
|---------------------|----------------|--------------|---------------------------------------------------------------------------------------------------------------------|-----------|------|------|
|                     |                |              |                                                                                                                     | mean ± SD |      |      |
| Up-regulated genes  |                |              |                                                                                                                     |           |      |      |
| ENSRNOG00000021354  | NM_017158.2    | Cyp2c7       | cytochrome P450, family 2, subfamily c, polypeptide 7                                                               | 3,45      | 0,59 | 0,00 |
| ENSRNOG00000013093  | NM_017158.2    | Cyp2c7       | cytochrome P450, family 2, subfamily c, polypeptide 7                                                               | 3,43      | 0,35 | 0,00 |
| ENSRNOG00000010410  | NM_012657.2    | Serpina3k    | serine (or cysteine) peptidase inhibitor, clade A, member 3K                                                        | 3,16      | 0,96 | 0,00 |
| ENSRNOG00000028734  | NM_017158      | Cyp2c7       | cytochrome P450, family 2, subfamily c, polypeptide 7                                                               | 3,08      | 0,60 | 0,00 |
| ENSRNOG00000021310  | XM_220441      | Slc36a3      | solute carrier family 36 (proton/amino acid symporter), member 3                                                    | 3,06      | 0,48 | 0,00 |
| ENSRNOG00000004692  | NM_022258      | A1bg         | alpha-1-B glycoprotein                                                                                              | 2,97      | 0,46 | 0,00 |
| ENSRNOG00000021336  | XM_230313      | XM_230313    | tetratricopeptide repeat domain 17 (predicted)                                                                      | 2,75      | 0,33 | 0,00 |
| ENSRNOG000000021380 | XM_221105      | Fads6        | fatty acid desaturase domain family, member 6 (predicted)                                                           | 2,75      | 0,38 | 0,00 |
| ENSRNOG000000011696 | NM_031048      | Lifr         | leukemia inhibitory factor receptor alpha                                                                           | 2,61      | 0,85 | 0,00 |
| ENSRNOG000000027024 | NM_001077589   | RGS16        | regulator of G-protein signaling 16                                                                                 | 2,43      | 0,59 | 0,00 |
| ENSRNOG00000014116  | NM_133616      | Sult2a1      | Alcohol sulfotransferase (hydroxysteroid sulfotransferase)                                                          | 2,35      | 0,91 | 0,00 |
| ENSRNOG00000011708  | NM_031572      | Cyp2c12      | Cytochrome P450 2C12, female specific (CYPIIC12)(15-BETA)                                                           | 2,18      | 1,07 | 0,00 |
| ENSRNOG00000010224  | NM_001015012   | RAB30        | RAB30, member RAS oncogene family                                                                                   | 1,97      | 0,43 | 0,00 |
| ENSRNOG00000017727  | NM_012630      | PRLR         | prolactin receptor                                                                                                  | 1,81      | 0,54 | 0,00 |
| ENSRNOG00000004294  | NM_022384      | Ascl1        | achaete-scute complex homolog 1 (Drosophila)                                                                        | 1,79      | 0,55 | 0,00 |
| ENSRNOG00000001442  | NM_031576      | Por          | P450 (cytochrome) oxidoreductase                                                                                    | 1,71      | 0,52 | 0,00 |
| ENSRNOG000000003020 | NM_001001509   | Hdmcp        | mitochondrial hepatocellular carcinoma-downregulated carrier protein                                                | 1,70      | 0,57 | 0,00 |
| ENSRNOG000000010478 | NM_182474      | SPI          | Serine protease inhibitor                                                                                           | 1,60      | 0,97 | 0,00 |
| ENSRNOG000000007545 | NM_199115      | Angptl4      | angiopoietin-like 4                                                                                                 | 1,53      | 0,41 | 0,00 |
| ENSRNOG00000010635  | NM_001004274   | Igfbp4       | insulin-like growth factor binding protein 4                                                                        | 1,50      | 0,20 | 0,00 |
| ENSRNOG00000014365  | NM_053765      | Gne          | glucosamine (UDP-N-acetyl)-2-epimerase/N-acetylmannosamine kinase                                                   | 1,47      | 0,26 | 0,00 |
| ENSRNOG00000019568  | NM_138875      | Jund         | Jun D proto-oncogene                                                                                                | 1,37      | 0,61 | 0,00 |
| ENSRNOG000000027784 | NM_001009965   | Eiih         | tsukushin; similar to hepatic protein EIIH                                                                          | 1,33      | 0,23 | 0,00 |
| ENSRNOG000000026293 | NM_021835      | Jun          | Jun oncogene                                                                                                        | 1,30      | 1,10 | 0,38 |
| ENSRNOG00000018450  | XM_347185      | Slc25a22     | solute carrier family 25 (mitochondrial carrier, glutamate), member 22                                              | 1,30      | 0,47 | 0,00 |
| ENSRNOG00000010198  | XM_234398      | LACH2        | cytosolic acyl CoA thioester hydrolase, inducible (long chain acyl-CoA hydrolase) (CTE-I) (LACH2)                   | 1,29      | 0,52 | 0,00 |
| ENSRNOG000000005661 | NM_024351      | nd           | heat shock cognate 71 KDA protein                                                                                   | 1,29      | 0,20 | 0,00 |
| ENSRNOG000000020266 | NM_017245      | LOC305181    | similar to Elongation factor 2 (EF-2); eukaryotic translation elongation factor 2                                   | 1,24      | 0,16 | 0,00 |
| ENSRNOG000000018145 | NM_001004085   | CrAT         | carnitine O-acetyltransferase (mitochondrial protein)                                                               | 1,21      | 0,60 | 0,00 |
| ENSRNOG000000020217 | NM_001013901   | PA1          | similar to RIKEN cDNA 2900092E17                                                                                    | 1,20      | 0,64 | 0,00 |
| ENSRNOG00000019834  | NM_001004082   | hsp90-beta   | similar to heat shock protein 1, beta; similar to HSP 90-beta (HSP 84); HSP 90kDa alpha (cytosolic), class B member | 1,18      | 0,22 | 0,00 |
| ENSRNOG00000017601  | NM_017070      | Srd5a1       | steroid-5-alpha-reductase, alpha polypeptide 1 (3-oxo-5 alpha-steroid delta 4-dehydrogenase alpha 1)                | 1,14      | 0,43 | 0,00 |
| ENSRNOG00000017749  | NM_133540      | Nkg7         | natural killer cell group 7 sequence                                                                                | 1,13      | 0,76 | 0,19 |
| ENSRNOG00000013788  | XM_003754118.1 | LOC100360180 | 6-phosphogluconate dehydrogenase, decarboxylating-like (LOC100360180),                                              | 1,13      | 0,47 | 0,00 |
| ENSRNOG000000005341 | XM_229938      | Upp2         | uridine phosphorylase 2                                                                                             | 1,13      | 0,35 | 0,00 |
| ENSRNOG000000020194 | NM_001013179   | Hes6         | hairy and enhancer of split 6 (Drosophila)                                                                          | 1,12      | 0,72 | 0,11 |
| ENSRNOG00000019312  | NM_001013070   | Tspan4       | tetraspanin 4                                                                                                       | 1,09      | 0,35 | 0,00 |
| ENSRNOG000000024496 | NM_001009717   | NM_001009717 | similar to leucine-rich alpha-2-glycoprotein                                                                        | 1,09      | 0,19 | 0,00 |
| ENSRNOG000000016170 | XM_215293      | XM_215293    | vanin 1 (predicted)                                                                                                 | 1,08      | 0,37 | 0,00 |
| ENSRNOG000000022157 | XM_225266      | RGD1561697   | similar to NK13                                                                                                     | 1,08      | 0,96 | 0,51 |
| ENSRNOG00000012605  | NM_053976.1    | Krt18        | keratin 18                                                                                                          | 1,07      | 0,30 | 0,00 |
| ENSRNOG000000022138 | NM_024351      | nd           | heat shock cognate 71 KDA protein                                                                                   | 1,06      | 0,33 | 0,00 |
| ENSRNOG000000022699 | XM_220739      | LOC303341    | hypothetical LOC303341                                                                                              | 1,06      | 0,28 | 0,00 |
| ENSRNOG000000027967 | NM_001079709.1 | Acot5        | acyl-CoA thioesterase 5                                                                                             | 1,03      | 0,38 | 0,00 |
| ENSRNOG00000014914  | NM_001008527   | nd           | aldehyde oxidase 3                                                                                                  | 1,03      | 0,41 | 0,00 |
| ENSRNOG00000015483  | NM_019340      | nd           | regulator of G-protein signaling 3 (RGS3) (fragment)                                                                | 1,03      | 0,37 | 0,00 |
| ENSRNOG00000014338  | NM_145677      | Slc25a25     | solute carrier family 25 (mitochondrial carrier, phosphate carrier), member 25                                      | 1,00      | 1,08 | 0,80 |
| ENSRNOG000000020480 | NM_053445      | Fads1        | fatty acid desaturase 1                                                                                             | 1,00      | 0,31 | 0,00 |
| ENSRNOG000000020067 | NM_182675      | Rab40c       | Rab40c, member RAS oncogene family                                                                                  | 1,00      | 0,75 | 0,38 |
| ENSRNOG00000019538  | NM_001000194   | NM_001000194 | olfactory receptor gene Olr208                                                                                      | 0,99      | 0,94 | 0,63 |
| ENSRNOG000000009434 | XM_236574      | Aa2-001      | similar to RIKEN cDNA 1300017J02                                                                                    | 0,98      | 0,18 | 0,00 |
| ENSRNOG000000021364 | Rn.131314      | LOC691311    | hypothetical protein LOC691311; hypothetical protein LOC687852                                                      | 0,97      | 0,46 | 0,08 |
| ENSRNOG000000028347 | NM_183403      | Gpx2         | glutathione peroxidase 2                                                                                            | 0,97      | 0,43 | 0,00 |
| ENSRNOG000000022180 | XM_002725097.2 | LOC100364618 | hypothetical protein LOC100364618                                                                                   | 0,96      | 0,74 | 0,45 |
| ENSRNOG000000008215 | XM_221124      | LOC690374    | tripartite motif-containing 47                                                                                      | 0,96      | 0,27 | 0,00 |
| ENSRNOG00000017914  | NM_134449      | Prkcdbp      | protein kinase C, delta binding protein                                                                             | 0,95      | 0,49 | 0,11 |
| ENSRNOG00000013552  | NM_139192.2    | Scd1         | acyl-CoA desaturase 1 (stearoyl-Co A desaturase 1) (Fatty acid desaturase 1) (Delta(9)-desaturase 1)                | 0,95      | 1,59 | 2,99 |
| ENSRNOG000000027116 | XR_146223.1    | LOC100362689 | keratin 8-like (LOC100362689)                                                                                       | 0,94      | 0,24 | 0,00 |
| ENSRNOG00000018736  | NM_001108509.2 | Pnpla2       | patatin-like phospholipase domain containing 2                                                                      | 0,94      | 0,14 | 0,00 |
| ENSRNOG000000024713 | XM_003749431.1 | LOC100911966 | ribosomal protein L7a-like                                                                                          | 0,93      | 0,23 | 0,00 |
| ENSRNOG000000022075 | NM_001114391.1 | Rpl7a        | ribosomal protein L7a                                                                                               | 0,93      | 0,25 | 0,00 |
| ENSRNOG000000023633 | XM_236253      | Crabp1       | cellular retinoic acid binding protein 1                                                                            | 0,93      | 0,05 | 0,00 |
| ENSRNOG000000024042 | XM_215513      | XM_215513    | similar to cytokeratin                                                                                              | 0,92      | 0,21 | 0,00 |
| ENSRNOG00000016097  | Rn.110564      | Ccbl1        | cysteine conjugate-beta lyase, cytoplasmic                                                                          | 0,92      | 0,24 | 0,00 |
| ENSRNOG00000019630  | NM_053493      | HACL1        | 2-hydroxyacyl-CoA lyase 1                                                                                           | 0,91      | 0,50 | 0,09 |
| ENSRNOG000000022721 | XM_003751878.1 | RGD1559899   | PREDICTED: Rattus norvegicus C-type lectin domain family 18 member A-like (RGD1559899)                              | 0,90      | 0,29 | 0,00 |
| ENSRNOG000000005906 | NM_031561      | FAT/CD36     | fatty acid translocase/CD36 (thrombospondin receptor)                                                               | 0,90      | 0,48 | 0,11 |
| ENSRNOG00000012622  | XM_238034      | Mmp15        | matrix metallopeptidase 15                                                                                          | 0,89      | 0,39 | 0,08 |
| ENSRNOG000000022047 | XM_224924.5    | RGD1561928   | 60S ribosomal protein L9-like (RGD1561928)                                                                          | 0,89      | 0,03 | 0,00 |
| ENSRNOG00000018649  | XM_230856      | Slc35C2      | solute carrier family 35, member C2                                                                                 | 0,88      | 0,43 | 0,11 |
| ENSRNOG00000019638  | NM_001002016.1 | Lmna         | lamin A (Lmna), transcript variant 2                                                                                | 0,88      | 0,24 | 0,00 |
| ENSRNOG000000028377 | XM_345572      | Mpl          | myeloproliferative leukemia virus oncogene                                                                          | 0,88      | 0,13 | 0,00 |
| ENSRNOG00000016827  | NM_145776      | Slc38a3      | solute carrier family 38, member 3                                                                                  | 0,87      | 0,46 | 0,11 |
| ENSRNOG000000020308 | NM_022594      | Ech1         | enoyl coenzyme A hydratase 1, peroxisomal                                                                           | 0,87      | 0,39 | 0,08 |
| ENSRNOG00000017093  | XM_341518      | MGC116297    | similar to 1300014I06Rik protein                                                                                    | 0,87      | 0,23 | 0,04 |
| ENSRNOG000000023638 | NM_031769.1    | Pdxk         | pyridoxal (pyridoxine, vitamin B6) kinase (Pdxk)                                                                    | 0,87      | 0,19 | 0,00 |
| ENSRNOG000000027674 | NM_031579.2    | Ptp4a1       | protein tyrosine phosphatase type IVA, member 1                                                                     | 0,86      | 0,27 | 0,00 |
| ENSRNOG000000028139 | XM_346272      | XM_346272    | similar to ferritin heavy chain - chicken                                                                           | 0,86      | 0,63 | 0,45 |
| ENSRNOG00000013251  | NM_001044266.1 | Trim24       | transcription intermediary factor 1-alpha                                                                           | 0,86      | 0,27 | 0,00 |
| ENSRNOG00000019180  | NM_053623      | ACSL4        | acyl-CoA synthetase long-chain family member 4                                                                      | 0,85      | 0,42 | 0,11 |
| ENSRNOG00000018567  | Rn.162702      | Slc20a1      | solute carrier family 20 (phosphate transporter), member 1                                                          | 0,85      | 0,52 | 0,26 |

|                    |                    |              |                                                                                                                      |      |      |      |
|--------------------|--------------------|--------------|----------------------------------------------------------------------------------------------------------------------|------|------|------|
| ENSRNOG00000025850 | XM_001072134.2     | LOC684838    | 60S ribosomal protein L7a-like                                                                                       | 0,85 | 0,12 | 0,00 |
| ENSRNOG00000019283 | NM_017255          | P2RY2        | purinergic receptor P2Y, G-protein coupled 2                                                                         | 0,84 | 0,41 | 0,11 |
| ENSRNOG00000022879 | NM_001033684.1     | Cct6a        | chaperonin containing Tcp1, subunit 6A (zeta 1) (Cct6a)                                                              | 0,84 | 0,30 | 0,00 |
| ENSRNOG00000009597 | NM_175837          | Cyp4a1       | cytochrome P450 4A1                                                                                                  | 0,84 | 0,70 | 0,51 |
| ENSRNOG00000021115 | XM_219534          | nd           | similar to 2610524G07Rik protein                                                                                     | 0,84 | 0,33 | 0,00 |
| ENSRNOG00000028037 | XM_343758          | XM_343758    | similar to protein tyrosine phosphatase 4a1                                                                          | 0,84 | 0,32 | 0,00 |
| ENSRNOG00000019626 | NM_024143          | Slc27a5      | solute carrier family 27 (fatty acid transporter), member 5                                                          | 0,84 | 0,41 | 0,11 |
| ENSRNOG00000020029 | XM_340774          | LOC682248    | hypothetical protein LOC682248; similar to RIKEN cDNA 9530058B02                                                     | 0,83 | 0,21 | 0,00 |
| ENSRNOG00000016030 | XM_001059941.3     | RGD1559149   | similar to 60S ribosomal protein L7a                                                                                 | 0,83 | 0,23 | 0,00 |
| ENSRNOG00000019484 | NM_053818          | Slc6a9       | solute carrier family 6 (neurotransmitter transporter, glycine), member 9                                            | 0,83 | 0,18 | 0,00 |
| ENSRNOG00000025879 | XM_341252          | nd           | similar to ribosomal protein L13                                                                                     | 0,83 | 0,21 | 0,00 |
| ENSRNOG00000006612 | XM_239239          | Map2k3       | mitogen activated protein kinase kinase 3                                                                            | 0,83 | 0,39 | 0,26 |
| ENSRNOG00000019858 | NM_001009690       | Rom1         | retinal outer segment membrane protein 1                                                                             | 0,82 | 0,27 | 0,00 |
| ENSRNOG00000016131 | NM_133602          | nd           | MAP2 RNA trans-acting protein marta 1                                                                                | 0,81 | 0,33 | 0,08 |
| ENSRNOG00000026871 | XR_147054.1        | LOC503131    | PREDICTED: Rattus norvegicus glyceraldehyde-3-phosphate dehydrogenase-like (LOC503131)                               | 0,81 | 0,43 | 0,19 |
| ENSRNOG00000020989 | NM_001013071       | Tm7sf2       | transmembrane 7 superfamily member 2                                                                                 | 0,81 | 0,34 | 0,08 |
| ENSRNOG00000020144 | XM_341935          | RGD1310127   | similar to cDNA sequence BC017158                                                                                    | 0,81 | 0,44 | 0,19 |
| ENSRNOG00000021246 | XM_342521          | CENPB        | centromere protein B                                                                                                 | 0,81 | 0,25 | 0,00 |
| ENSRNOG00000023459 | NM_001109263.1     | Lurap1       | leucine rich adaptor protein 1 (Lurap1)                                                                              | 0,81 | 0,66 | 0,51 |
| ENSRNOG00000017962 | NM_199085          | Serpinb6a    | serine (or cysteine) peptidase inhibitor, clade B, member 6a                                                         | 0,81 | 0,28 | 0,00 |
| ENSRNOG00000028121 | XM_221107          | OTOP2        | otopetrin 2 (predicted)                                                                                              | 0,81 | 0,10 | 0,00 |
| ENSRNOG00000016957 | NM_013122          | Igfbp2       | insulin-like growth factor binding protein 2                                                                         | 0,80 | 0,61 | 0,51 |
| ENSRNOG00000014791 | XM_218226          | PEG3         | paternally expressed 3                                                                                               | 0,79 | 0,30 | 0,08 |
| ENSRNOG00000017243 | NM_053420          | BNIP3        | BCL2/adenovirus E1B 19 kDa-interacting protein 3                                                                     | 0,79 | 0,31 | 0,08 |
| ENSRNOG00000020293 | NM_022639          | Chrna10      | cholinergic receptor, nicotinic, alpha 10                                                                            | 0,79 | 0,09 | 0,00 |
| ENSRNOG00000015502 | XM_215693          | Hiat1        | hippocampus abundant gene transcript 1                                                                               | 0,79 | 0,37 | 0,11 |
| ENSRNOG00000018666 | NM_144745          | AGS3         | G-protein signaling modulator 1 (AGS3-like, C. elegans)                                                              | 0,79 | 0,32 | 0,11 |
| ENSRNOG00000026899 | XM_001076433.2     | RGD1561520   | PREDICTED: Rattus norvegicus ferritin light chain 1-like (RGD1561520)                                                | 0,78 | 0,38 | 0,11 |
| ENSRNOG00000022514 | NM_001007744       | Tor2a        | torsin family 2, member A                                                                                            | 0,78 | 0,26 | 0,00 |
| ENSRNOG00000016520 | XM_236582          | XM_236582    | similar to 5730439E10Rik protein (predicted)                                                                         | 0,78 | 0,39 | 0,14 |
| ENSRNOG00000011635 | XM_341636          | Ces5         | carboxylesterase 5                                                                                                   | 0,78 | 0,72 | 1,32 |
| ENSRNOG00000008190 | Rn.162643          | Ntel1        | patatin-like phospholipase domain containing 7                                                                       | 0,78 | 0,11 | 0,00 |
| ENSRNOG00000021102 | NM_017288          | SCN1B        | sodium channel, voltage-gated, type I, beta                                                                          | 0,78 | 0,34 | 0,11 |
| ENSRNOG00000021393 | XM_233976          | XM_233976    | similar to B(0,-)type amino acid transporter 1 (B(0,-)AT) (Glycoprotein-associated amino acid transporter b0,L)      | 0,78 | 0,27 | 0,00 |
| ENSRNOG00000001259 | XM_222184          | CUX2         | similar to Homeobox protein cut-like 2 (Homeobox protein Cux-2) (Cut-like 2)                                         | 0,77 | 0,29 | 0,08 |
| ENSRNOG00000020704 | XM_342023          | DAK          | dihydroxyacetone kinase 2 homolog (S. cerevisiae)                                                                    | 0,77 | 0,46 | 0,38 |
| ENSRNOG00000021027 | NM_012543          | Dbp          | D site of albumin promoter (albumin D-box) binding protein                                                           | 0,77 | 0,41 | 0,19 |
| ENSRNOG00000003758 | XM_215591          | LOC363224    | similar to heat shock protein 1, beta; similar to HSP 90-beta (HSP 84) (Tumor-specific transplatation 84 kDa antigen | 0,77 | 0,13 | 0,00 |
| ENSRNOG00000021008 | XM_225971          | KCTD16       | similar to potassium channel tetramerisation domain containing 16                                                    | 0,77 | 0,35 | 0,11 |
| ENSRNOG00000020345 | XM_224736          | LOC689414    | solute carrier family 25, member 42                                                                                  | 0,77 | 0,08 | 0,00 |
| ENSRNOG00000005642 | XM_235164          | frs2         | fibroblast growth factor receptor substrate 2                                                                        | 0,76 | 0,64 | 0,63 |
| ENSRNOG00000020420 | NM_012624          | pk1          | pyruvate kinase, liver and RBC                                                                                       | 0,76 | 0,62 | 0,63 |
| ENSRNOG00000024572 | NM_001000478       | NM_001000478 | olfactory receptor gene Olr1334                                                                                      | 0,76 | 0,27 | 0,08 |
| ENSRNOG00000007395 | NM_017300          | BAAT         | bile acid Co A: amino acid N-acyltransferase (glycine N-choloyltransferase)                                          | 0,76 | 0,14 | 0,00 |
| ENSRNOG00000011526 | NM_012999          | Pace4        | proprotein convertase subtilisin/kexin type 6                                                                        | 0,76 | 0,17 | 0,00 |
| ENSRNOG00000021370 | Rn.163094          | Ccdc69       | coiled-coil domain containing 69                                                                                     | 0,76 | 0,22 | 0,00 |
| ENSRNOG00000025567 | NM_178103.2        | Eddm3b       | epididymal secretory protein 3                                                                                       | 0,75 | 0,57 | 0,51 |
| ENSRNOG00000014008 | XM_216525          | MFS2         | major facilitator superfamily domain containing 2                                                                    | 0,75 | 0,76 | 0,87 |
| ENSRNOG00000020238 | XM_340909          | Plekhh3      | pleckstrin homology domain containing, family H (with MyTH4 domain) member 3                                         | 0,75 | 0,13 | 0,00 |
| ENSRNOG00000020177 | NM_001191951.1     | Ahnak        | AHNAK nucleoprotein (Ahnak)                                                                                          | 0,75 | 0,39 | 0,26 |
| ENSRNOG00000021463 | NM_013196          | Ppara        | peroxisome proliferator activated receptor alpha                                                                     | 0,75 | 0,27 | 0,08 |
| ENSRNOG00000026958 | NM_001024325.1     | LOC500077    | similar to RIKEN cDNA 3110062M04 (LOC500077)                                                                         | 0,75 | 0,57 | 0,51 |
| ENSRNOG00000027833 | XM_227287          | RGD1562174   | similar to mKIAA1450 protein                                                                                         | 0,75 | 0,58 | 0,51 |
| ENSRNOG00000018413 | NM_023978.2        | Per3         | period circadian clock 3 (Per3)                                                                                      | 0,75 | 0,63 | 0,63 |
| ENSRNOG00000016410 | NM_001009636       | Preli        | PRELI domain containing 1; similar to 2610524G07Rik protein                                                          | 0,75 | 0,37 | 0,19 |
| ENSRNOG00000021750 | NM_012797          | Id1          | inhibitor of DNA binding 1                                                                                           | 0,74 | 0,21 | 0,00 |
| ENSRNOG00000026094 | NM_001099495.1     | Vom2r54      | vomeroneasal 2 receptor, 55 (Vom2r55)                                                                                | 0,74 | 0,46 | 0,38 |
| ENSRNOG00000012626 | XM_234443          | nd           | similar to Expressed sequence AI324246                                                                               | 0,74 | 0,32 | 0,11 |
| ENSRNOG00000018944 | XM_215283          | Pank1        | pantothenate kinase 1                                                                                                | 0,74 | 0,18 | 0,00 |
| ENSRNOG00000015822 | NM_001135094.1     | Klf14        | Kruppel-like factor 14 (Klf14)                                                                                       | 0,74 | 0,56 | 0,51 |
| ENSRNOG00000022166 | XM_002730211.2     | Ammecr1      | AMME syndrome candidate gene 1 protein homolog, transcript variant 1 (RGD1561004),                                   | 0,73 | 0,17 | 0,00 |
| ENSRNOG00000019383 | NM_019194          | Tef          | thyrotrophic embryonic factor                                                                                        | 0,73 | 0,38 | 0,26 |
| ENSRNOG00000005615 | NM_024127          | Gadd45a      | growth arrest and DNA-damage-inducible, alpha                                                                        | 0,73 | 0,32 | 0,11 |
| ENSRNOG00000023719 | XM_340769          | XM_340769    | similar to hypothetical protein FLJ12681 (predicted)                                                                 | 0,73 | 0,24 | 0,08 |
| ENSRNOG00000027142 | ENSRNOG00000027142 | RGD1565680   | similar to Hypothetical protein DJ1198H6.2                                                                           | 0,72 | 0,17 | 0,00 |
| ENSRNOG00000008755 | NM_017340          | ACOX1        | acyl-CoA oxidase 1, palmitoyl                                                                                        | 0,72 | 0,49 | 0,45 |
| ENSRNOG00000020591 | NM_021598          | nd           | mast cell protease VIII precursor (RMCP-VIII) (RMCP-8)                                                               | 0,72 | 0,51 | 0,51 |
| ENSRNOG00000018132 | XM_346958          | LOC361335    | LOC361334                                                                                                            | 0,72 | 0,53 | 0,51 |
| ENSRNOG00000008167 | NM_001007680       | Abhd6        | abhydrolase domain containing 6                                                                                      | 0,72 | 0,33 | 0,19 |
| ENSRNOG00000017683 | XM_341456          | Adam18       | ADAM metallopeptidase domain 18                                                                                      | 0,72 | 0,32 | 0,19 |
| ENSRNOG00000023879 | XM_233225          | XM_233225    | similar to 40S RIBOSOMAL PROTEIN SA (P40) (34/67 KD LAMININ RECEPTOR)                                                | 0,72 | 0,13 | 0,00 |
| ENSRNOG00000017210 | XM_341519          | Nr1p         | solute carrier family 22, member 23                                                                                  | 0,72 | 0,25 | 0,08 |
| ENSRNOG00000011281 | XM_003749251.1     | EIF4G1       | eukaryotic translation initiation factor 4 gamma 1-like (LOC100911693)                                               | 0,71 | 0,13 | 0,00 |
| ENSRNOG00000002642 | XM_343135          | PTGES3       | Prostaglandin E synthase 3                                                                                           | 0,71 | 0,09 | 0,00 |
| ENSRNOG00000017997 | XM_224610          | NEK4         | NIMA (never in mitosis gene a)-related expressed kinase 4 (predicted)                                                | 0,71 | 0,50 | 0,51 |
| ENSRNOG00000023159 | XM_221123          | nd           | 40S ribosomal protein S18 (KE-3)                                                                                     | 0,71 | 0,17 | 0,00 |
| ENSRNOG00000008116 | NM_138905          | Ppap2b       | phosphatidic acid phosphatase type 2B                                                                                | 0,71 | 0,48 | 0,51 |
| ENSRNOG00000023308 | XM_217585          | nd           | ferritin light chain (ferritin L subunit).                                                                           | 0,71 | 0,36 | 0,26 |
| ENSRNOG00000007141 | XM_216656          | Preb         | Prolactin regulatory element-binding protein                                                                         | 0,70 | 0,17 | 0,00 |
| ENSRNOG00000028484 | XM_228162          | Rshl3        | radial spokehead-like 3                                                                                              | 0,70 | 0,24 | 0,08 |
| ENSRNOG00000018259 | XM_217346          | XM_217346    | serum response factor (predicted)                                                                                    | 0,70 | 0,45 | 0,45 |
| ENSRNOG00000022364 | NM_199490          | Dsg4         | desmoglein 4                                                                                                         | 0,70 | 0,31 | 0,19 |
| ENSRNOG00000021139 | NM_001008511       | Esrra        | estrogen related receptor, alpha                                                                                     | 0,70 | 0,08 | 0,00 |
| ENSRNOG00000021375 | XM_344413          | XM_344413    | similar to putative E1-E2 ATPase                                                                                     | 0,70 | 0,20 | 0,00 |

|                     |                |              |                                                                                                           |      |      |      |
|---------------------|----------------|--------------|-----------------------------------------------------------------------------------------------------------|------|------|------|
| ENSRNOG00000011289  | XM_215538      | nd           | similar to eukaryotic translation initiation factor 4G I                                                  | 0,70 | 0,41 | 0,38 |
| ENSRNOG00000025114  | NM_024125      | Cebpb        | CCAAT/enhancer binding protein (C/EBP), beta                                                              | 0,70 | 0,60 | 0,71 |
| ENSRNOG00000008095  | NM_022671      | Onecut1      | one cut homeobox 1 (HNF-6)                                                                                | 0,70 | 0,39 | 0,38 |
| ENSRNOG00000020990  | NM_130752      | FGF21        | fibroblast growth factor 21                                                                               | 0,69 | 0,57 | 0,63 |
| ENSRNOG00000010326  | NM_145090      | Arf GAP1     | ADP-ribosylation factor GTPase activating protein 1; collagen, type XX, alpha 1                           | 0,69 | 0,33 | 0,26 |
| ENSRNOG00000019936  | XM_215003      | RGD1311634   | similar to RIKEN cDNA 3200002M19                                                                          | 0,69 | 0,45 | 0,51 |
| ENSRNOG00000020321  | XM_214175      | RGD1308396   | similar to chromosome 14 open reading frame 21                                                            | 0,69 | 0,29 | 0,19 |
| ENSRNOG00000023660  | XM_342702      | nd           | similar to Fam13a1 protein (predicted)                                                                    | 0,69 | 0,13 | 0,00 |
| ENSRNOG00000012683  | XM_341879      | FAM108C1     | family with sequence similarity 108, member C1                                                            | 0,69 | 0,27 | 0,11 |
| ENSRNOG000000008109 | NM_022694      | nd           | P105 coactivator                                                                                          | 0,69 | 0,24 | 0,11 |
| ENSRNOG00000019428  | NM_080902.4    | Higd1a       | HIG1 hypoxia inducible domain family, member 1A (Higd1a)                                                  | 0,69 | 0,17 | 0,00 |
| ENSRNOG00000011330  | NM_144743      | Ces6         | carboxylesterase 6                                                                                        | 0,69 | 0,68 | 0,87 |
| ENSRNOG00000027773  | XM_234484      | SMEK1        | SMEK homolog 1, suppressor of mek1 (Dictyostelium)                                                        | 0,68 | 0,47 | 0,51 |
| ENSRNOG00000003872  | NM_133315      | Slc40a1      | solute carrier family 39 (iron-regulated transporter), member 1                                           | 0,68 | 0,19 | 0,10 |
| ENSRNOG00000015701  | XM_225250      | Rreb1        | ras responsive element binding protein 1                                                                  | 0,68 | 0,19 | 0,08 |
| ENSRNOG00000001496  | XM_341791      | nd           | similar to Alcohol sulfotransferase (Hydroxysteroid sulfotransferase) (ST) (ST-60)                        | 0,68 | 0,42 | 0,45 |
| ENSRNOG00000023268  | XM_227276      | XM_227276    | similar to Nucleolar GTP-binding protein 1 (Chronic renal failure gene protein) (GTP-binding protein NGB) | 0,68 | 0,24 | 0,11 |
| ENSRNOG00000015654  | NM_017094.1    | Ghr          | growth hormone receptor                                                                                   | 0,68 | 0,24 | 0,11 |
| ENSRNOG00000026919  | NM_001270038.1 | RGD1565367   | similar to Solute carrier family 23, member 2 (Sodium-dependent vitamin C transporter 2) (RGD1565367)     | 0,67 | 0,24 | 0,11 |
| ENSRNOG000000027329 | XM_345625      | Dhx57        | DEAH (Asp-Glu-Ala-Asp/His) box polypeptide 57                                                             | 0,67 | 0,47 | 0,51 |
| ENSRNOG000000021317 | NM_001005905   | Cct2         | chaperonin containing TCP1, subunit 2 (beta)                                                              | 0,67 | 0,07 | 0,00 |
| ENSRNOG00000023208  | XM_345524      | RGD1309821   | similar to KIAA1161 protein                                                                               | 0,67 | 0,17 | 0,00 |
| ENSRNOG00000028553  | NM_001001361.1 | Olr903       | olfactory receptor 903 (Olr903)                                                                           | 0,67 | 0,14 | 0,00 |
| ENSRNOG00000015195  | XM_216417      | HDHD3        | haloacid dehalogenase-like hydrolase domain containing 3                                                  | 0,67 | 0,21 | 0,08 |
| ENSRNOG00000011414  | NM_031595      | Psmc3        | proteasome (prosome, macropain) 26S subunit, ATPase 3                                                     | 0,67 | 0,28 | 0,19 |
| ENSRNOG00000023332  | XM_227369      | nd           | similar to hornerin (predicted)                                                                           | 0,67 | 0,28 | 0,19 |
| ENSRNOG00000025613  | NM_022693      | nd           | SH3-domain binding protein 4                                                                              | 0,67 | 0,20 | 0,08 |
| ENSRNOG00000025923  | XM_214087      | ZMIZ2        | zinc finger, MIZ-type containing 2                                                                        | 0,67 | 0,35 | 0,38 |
| ENSRNOG00000028530  | XM_344783      | ZFPM1        | zinc finger protein, multitype 1                                                                          | 0,67 | 0,22 | 0,11 |
| ENSRNOG00000014742  | XM_001080794.3 | Ankrd13b     | PREDICTED: Rattus norvegicus ankyrin repeat domain 13B (Ankrd13b)                                         | 0,67 | 0,53 | 0,63 |
| ENSRNOG00000025052  | XM_218848      | STARD5       | StAR-related lipid transfer (START) domain containing 5                                                   | 0,67 | 0,43 | 0,51 |
| ENSRNOG00000024752  | NM_172222      | NM_172222    | complement component 2                                                                                    | 0,67 | 0,35 | 0,38 |
| ENSRNOG00000010931  | XM_342338      | nd           | similar to hypothetical protein PRO0971 (predicted)                                                       | 0,67 | 0,31 | 0,26 |
| ENSRNOG00000018621  | XM_214812      | Leng9        | leukocyte receptor cluster (LRC) member 9                                                                 | 0,67 | 0,50 | 0,63 |
| ENSRNOG00000017276  | NM_001001000   | Olr167       | olfactory receptor 167; olfactory receptor 162                                                            | 0,67 | 0,53 | 0,71 |
| ENSRNOG00000007758  | XM_345770      | Hsd17b6      | hydroxysteroid (17-beta) dehydrogenase 6                                                                  | 0,66 | 0,28 | 0,19 |
| ENSRNOG00000028191  | NM_001014162.4 | ACSm5        | acyl-CoA synthetase medium-chain family member 5 (Acsm5)                                                  | 0,66 | 0,65 | 1,22 |
| ENSRNOG00000016818  | NM_053429      | Fgfr3        | fibroblast growth factor receptor 3                                                                       | 0,66 | 0,23 | 0,11 |
| ENSRNOG00000010222  | NM_012570      | GLUD1        | glutamate dehydrogenase 1                                                                                 | 0,66 | 0,26 | 0,19 |
| ENSRNOG00000010543  | NM_001034150.1 | Srpr         | signal recognition particle receptor ('docking protein')                                                  | 0,66 | 0,16 | 0,00 |
| ENSRNOG00000026638  | NM_031726.1    | scamp5       | secretory carrier membrane protein 5 (Scamp5)                                                             | 0,66 | 0,35 | 0,38 |
| ENSRNOG00000023639  | XM_213253      | Rpusd1       | RNA pseudouridylate synthase domain containing 1                                                          | 0,66 | 0,13 | 0,00 |
| ENSRNOG00000027124  | NM_053729      | Tdg          | thymine-DNA glycosylase                                                                                   | 0,66 | 0,23 | 0,11 |
| ENSRNOG00000026722  | NM_001025131.1 | Sult2a2      | sulfotransferase family 2A, dehydroepiandrosterone (DHEA)-preferring, member 2 (Sult2a2)                  | 0,66 | 0,49 | 0,63 |
| ENSRNOG00000020315  | XM_227586      | Taf13        | TAF13 RNA polymerase II, TATA box binding protein (TBP)-associated factor                                 | 0,66 | 0,17 | 0,08 |
| ENSRNOG00000010958  | NM_022540      | Prdx3        | peroxiredoxin 3                                                                                           | 0,66 | 0,49 | 0,63 |
| ENSRNOG00000028447  | NM_001000361   | NM_001000361 | olfactory receptor gene Olr718                                                                            | 0,66 | 0,24 | 0,11 |
| ENSRNOG00000011305  | NM_019193      | Sox10        | SRY (sex determining region Y)-box 10                                                                     | 0,66 | 0,61 | 0,87 |
| ENSRNOG00000021033  | NM_001012001   | NM_001012001 | leucine rich repeat containing 2 (predicted)                                                              | 0,65 | 0,47 | 0,63 |
| ENSRNOG00000011205  | NM_013025      | Ccl3         | chemokine (C-C motif) ligand 3                                                                            | 0,65 | 0,26 | 0,19 |
| ENSRNOG00000015026  | NM_023982      | Arhgef11     | Rho guanine nucleotide exchange factor (GEF) 11                                                           | 0,65 | 0,40 | 0,45 |
| ENSRNOG00000016573  | NM_001012345   | Dgat2        | diacylglycerol O-acyltransferase homolog 2 (mouse)                                                        | 0,65 | 0,38 | 0,45 |
| ENSRNOG00000015496  | NM_012678      | TPM4         | tropomyosin 4                                                                                             | 0,65 | 0,32 | 0,38 |
| ENSRNOG00000010067  | NM_031342      | Lypla2       | lysophospholipase 2; Acyl-protein thioesterase 2                                                          | 0,65 | 0,31 | 0,26 |
| ENSRNOG00000025627  | XM_235384      | XM_235384    | Cohen syndrome 1 (predicted)                                                                              | 0,65 | 0,19 | 0,08 |
| ENSRNOG00000020876  | Rn.10668       | Bax          | similar to BAX protein, cytoplasmic isoform delta; Bcl2-associated X protein                              | 0,65 | 0,23 | 0,11 |
| ENSRNOG00000004448  | NM_001108091.1 | Acss3        | acyl-CoA synthetase short-chain family member 3, mitochondrial                                            | 0,65 | 0,08 | 0,00 |
| ENSRNOG00000027339  | XM_342164      | nd           | similar to Heph protein                                                                                   | 0,65 | 0,19 | 0,08 |
| ENSRNOG00000023348  | XM_232990      | TBC1D2       | TBC1 domain family, member 2                                                                              | 0,65 | 0,20 | 0,11 |
| ENSRNOG00000001009  | NM_001009604   | BRI3         | brain protein I3                                                                                          | 0,65 | 0,31 | 0,26 |
| ENSRNOG00000008553  | XM_342975      | Mthfr        | 5,10-methylenetetrahydrofolate reductase (NADPH)                                                          | 0,65 | 0,49 | 0,63 |
| ENSRNOG00000016924  | NM_016987      | ACLY         | ATP citrate lyase                                                                                         | 0,65 | 1,07 | 3,73 |
| ENSRNOG00000008946  | NM_024139      | RGD1565588   | similar to calcium binding protein P22                                                                    | 0,65 | 0,28 | 0,19 |
| ENSRNOG00000005479  | NM_017215      | Slc1a2       | solute carrier family 1 (glial high affinity glutamate transporter), member 2                             | 0,65 | 0,32 | 0,38 |
| ENSRNOG00000010918  | NM_012524      | Cebpa        | CCAAT/enhancer binding protein (C/EBP), alpha                                                             | 0,65 | 0,73 | 1,71 |
| ENSRNOG00000021154  | NM_053549      | nd           | Vascular endothelial growth factor B (VEGF-B)                                                             | 0,65 | 0,31 | 0,38 |
| ENSRNOG00000009447  | Rn.161839      | LOC500118    | similar to RIKEN cDNA D330028D13                                                                          | 0,65 | 0,23 | 0,11 |
| ENSRNOG00000020930  | XM_213493      | RGD1311493   | similar to CG13379-PA                                                                                     | 0,64 | 0,20 | 0,11 |
| ENSRNOG00000021330  | XM_226564      | RGD1559496   | Gm505                                                                                                     | 0,64 | 0,30 | 0,26 |
| ENSRNOG00000019634  | NM_001000824.1 | Olr421       | olfactory receptor 421 (Olr421)                                                                           | 0,64 | 0,32 | 0,38 |
| ENSRNOG00000012073  | NM_001007664   | Abhd14b      | abhydrolase domain containing 14b                                                                         | 0,64 | 0,33 | 0,38 |
| ENSRNOG00000019798  | NM_001025625   | STUB1        | STIP1 homology and U-Box containing protein 1                                                             | 0,64 | 0,28 | 0,26 |
| ENSRNOG00000024385  | XM_217111      | BARS-38      | Glyceraldehyde 3-phosphate dehydrogenase (38 KDA BFA-dependent ADP-robosylation substrate) (BARS-38)      | 0,64 | 0,35 | 0,45 |
| ENSRNOG00000017437  | XM_003751278.1 | LOC100359583 | PREDICTED: Rattus norvegicus hypothetical protein LOC100359583                                            | 0,64 | 0,06 | 0,00 |
| ENSRNOG00000019393  | XM_217039      | eplin        | LIM domain and actin binding 1                                                                            | 0,64 | 0,27 | 0,26 |
| ENSRNOG00000021306  | NM_001000342   | NM_001000342 | olfactory receptor gene Olr655                                                                            | 0,64 | 0,28 | 0,26 |
| ENSRNOG00000016167  | NM_001109133.1 | Spata2L      | spermatogenesis associated 2-like (Spata2L)                                                               | 0,64 | 0,21 | 0,11 |
| ENSRNOG00000027367  | XM_225091      | XM_225091    | similar to testicular serine protease 1                                                                   | 0,64 | 0,11 | 0,00 |
| ENSRNOG00000020229  | NM_053310      | homer3       | homer homolog 3 (Drosophila)                                                                              | 0,64 | 0,20 | 0,11 |
| ENSRNOG00000008855  | NM_001004099   | CXN-26       | gap junction protein, beta 2                                                                              | 0,64 | 0,44 | 0,51 |
| ENSRNOG00000025514  | XM_001070873.3 | Zfp335       | PREDICTED: Rattus norvegicus zinc finger protein 335, transcript variant 2 (Zfp335)                       | 0,64 | 0,39 | 0,51 |
| ENSRNOG00000025620  | NM_017142.1    | Adcy8        | adenylate cyclase 8 (brain) (Adcy8)                                                                       | 0,64 | 0,18 | 0,11 |
| ENSRNOG00000022747  | XM_003752284.1 | LOC100362470 | PREDICTED: Rattus norvegicus MKL/myocardin-like 2 (LOC100362470)                                          | 0,63 | 0,32 | 0,38 |
| ENSRNOG00000010103  | NM_001008324   | EIF4B        | eukaryotic translation initiation factor 4B                                                               | 0,63 | 0,18 | 0,11 |

|                     |                    |              |                                                                                                                          |      |      |      |
|---------------------|--------------------|--------------|--------------------------------------------------------------------------------------------------------------------------|------|------|------|
| ENSRNOG00000009565  | NM_053551          | Pdk4         | pyruvate dehydrogenase kinase, isozyme 4                                                                                 | 0,63 | 0,66 | 1,22 |
| ENSRNOG00000016218  | NM_133541          | Gtf3c1       | general transcription factor III C 1                                                                                     | 0,63 | 0,27 | 0,26 |
| ENSRNOG00000024781  | XM_237984          | XM_237984    | similar to low density lipoprotein receptor-related protein 2; glycoprotein 330; low density lipoprotein-related protein | 0,63 | 0,36 | 0,45 |
| ENSRNOG00000024500  | NM_017008.4        | Gapdh        | glyceraldehyde-3-phosphate dehydrogenase (Gapdh)                                                                         | 0,63 | 0,38 | 0,51 |
| ENSRNOG00000021164  | NM_138911          | LOC691340    | similar to stress-induced phosphoprotein 1                                                                               | 0,63 | 0,14 | 0,08 |
| ENSRNOG00000026631  | XM_001062428.2     | LOC685125    | PREDICTED: Rattus norvegicus disks large homolog 5-like (LOC685125)                                                      | 0,63 | 0,49 | 0,71 |
| ENSRNOG00000028404  | XM_340891          | Ppp1r1b      | protein phosphatase 1, regulatory (inhibitor) subunit 1B                                                                 | 0,63 | 0,18 | 0,11 |
| ENSRNOG00000014650  | XM_342055          | Sema4g       | sema domain, immunoglobulin domain (Ig), transmembrane domain (TM) and short cytoplasmic domain, (semaphori              | 0,63 | 0,53 | 0,87 |
| ENSRNOG00000028103  | NM_001008281       | Psmd3        | proteasome (prosome, macropain) 26S subunit, non-ATPase, 3                                                               | 0,63 | 0,17 | 0,11 |
| ENSRNOG000000007133 | XM_243652          | Plxnb2       | plexin B2                                                                                                                | 0,62 | 0,26 | 0,26 |
| ENSRNOG000000001379 | NM_147206          | Cyp3a9       | Cytochrome P450 3A9                                                                                                      | 0,62 | 0,49 | 0,71 |
| ENSRNOG00000026605  | NM_206846          | Ifi2712b     | interferon, alpha-inducible protein 27 like 2B                                                                           | 0,62 | 0,47 | 0,71 |
| ENSRNOG00000021083  | NM_001000251       | Olr329       | olfactory receptor 329                                                                                                   | 0,62 | 0,19 | 0,11 |
| ENSRNOG000000004101 | NM_001100811.1     | Marc1        | mitochondrial amidoxime reducing component 1 (Marc1), nuclear gene encoding mitochondrial protein                        | 0,62 | 0,45 | 0,63 |
| ENSRNOG00000016150  | XM_217254          | lfrd2        | interferon-related developmental regulator 2                                                                             | 0,62 | 0,25 | 0,26 |
| ENSRNOG00000028636  | NM_001012228.1     | Xkr5         | XK, Kell blood group complex subunit-related family, member 5                                                            | 0,62 | 0,35 | 0,45 |
| ENSRNOG00000026025  | Rn.123410          | Capn11       | calpain 11                                                                                                               | 0,62 | 0,10 | 0,00 |
| ENSRNOG00000023679  | XM_342704          | Prdm5        | PR domain containing 5 (predicted)                                                                                       | 0,62 | 0,16 | 0,11 |
| ENSRNOG00000016344  | XM_342286          | Slc39a1      | solute carrier family 39 (zinc transporter), member 1                                                                    | 0,62 | 0,30 | 0,38 |
| ENSRNOG00000022769  | XM_343611          | LOC363269    | SP100 nuclear antigen                                                                                                    | 0,62 | 0,24 | 0,19 |
| ENSRNOG00000008843  | NM_017306          | Dci          | dodecenoyl-Co A delta isomerase (3,2 trans-enoyl-CoA isomerase)                                                          | 0,62 | 0,36 | 0,45 |
| ENSRNOG00000026000  | ENSRNOG00000026000 | Vom2r7       | similar to putative pheromone receptor (Go-VN5); vomeronasal 2 receptor, 7                                               | 0,62 | 0,05 | 0,00 |
| ENSRNOG00000022392  | NM_053612          | Hspb8        | heat shock protein 8                                                                                                     | 0,62 | 0,24 | 0,26 |
| ENSRNOG00000020206  | NM_134334          | Ctsd         | cathepsin D                                                                                                              | 0,62 | 0,34 | 0,45 |
| ENSRNOG00000025383  | NM_001004072       | LOC685778    | pyruvate dehydrogenase E1 alpha 1 pseudogene; pyruvate dehydrogenase (lipoamide) alpha 1                                 | 0,62 | 0,25 | 0,26 |
| ENSRNOG00000000619  | XM_344286          | Dnajc9       | DnaJ (Hsp40) homolog, subfamily C, member 9                                                                              | 0,62 | 0,65 | 1,71 |
| ENSRNOG00000012443  | NM_012930          | CPT-2        | carnitine palmitoyltransferase 2                                                                                         | 0,62 | 0,23 | 0,19 |
| ENSRNOG00000020253  | NM_001008370       | RAB1B        | similar to Ras-related protein Rab-1B                                                                                    | 0,62 | 0,27 | 0,26 |
| ENSRNOG00000028629  | NM_033230          | Akt1         | v-akt murine thymoma viral oncogene homolog 1                                                                            | 0,61 | 0,30 | 0,38 |
| ENSRNOG00000000465  | NM_001008885       | RT1-Ke4      | solute carrier family 39 (zinc transporter), member 7                                                                    | 0,61 | 0,17 | 0,11 |
| ENSRNOG00000020507  | NM_001127654.1     | Tm6sf2       | transmembrane 6 superfamily member 2 (Tm6sf2)                                                                            | 0,61 | 0,27 | 0,38 |
| ENSRNOG000000009028 | XM_234880          | Rnf126       | ring finger protein 126                                                                                                  | 0,61 | 0,26 | 0,26 |
| ENSRNOG00000023885  | XM_344587          | nd           | similar to triosephosphate isomerase 1                                                                                   | 0,61 | 0,27 | 0,38 |
| ENSRNOG00000014187  | NM_052807          | Igf1r        | insulin-like growth factor 1 receptor                                                                                    | 0,61 | 0,45 | 0,63 |
| ENSRNOG00000010216  | XM_214237          | RGD1308772   | similar to KIAA0564 protein                                                                                              | 0,61 | 0,23 | 0,19 |
| ENSRNOG00000022993  | XM_236595          | XM_236595    | similar to RIKEN cDNA E330026B02 (predicted)                                                                             | 0,61 | 0,38 | 0,51 |
| ENSRNOG00000022031  | XM_343232          | XM_343232    | similar to 60S ribosomal protein L7a (Surfeit locus protein 3) (PLA-X polypeptide)                                       | 0,61 | 0,15 | 0,08 |
| ENSRNOG00000013089  | NM_213626          | kif13B       | kinesin 13B                                                                                                              | 0,61 | 0,32 | 0,45 |
| ENSRNOG00000020039  | NM_022590          | Slc5a2       | solute carrier family 5 (sodium/glucose cotransporter), member 2                                                         | 0,61 | 0,29 | 0,38 |
| ENSRNOG00000011078  | NM_053464          | Srm          | spermidine synthase                                                                                                      | 0,61 | 0,38 | 0,51 |
| ENSRNOG00000027670  | XM_216629          | XM_216629    | ADP-ribosylation factor-like 6 interacting protein 2 (predicted)                                                         | 0,61 | 0,18 | 0,11 |
| ENSRNOG00000025748  | XM_222038          | nd           | similar to putative pheromone receptor                                                                                   | 0,61 | 0,25 | 0,26 |
| ENSRNOG00000004793  | XM_234929          | Ncln         | nicalin homolog (zebrafish)                                                                                              | 0,61 | 0,09 | 0,00 |
| ENSRNOG00000017882  | XM_344631          | RGD1560691   | Camk1d                                                                                                                   | 0,61 | 0,20 | 0,11 |
| ENSRNOG00000015591  | NM_001010920       | Cndp2        | CNDP dipeptidase 2 (metallopeptidase M20 family)                                                                         | 0,61 | 0,27 | 0,38 |
| ENSRNOG00000025459  | XM_216910          | MARS         | methionine-tRNA synthetase (predicted)                                                                                   | 0,61 | 0,13 | 0,08 |
| ENSRNOG00000020426  | XM_218336          | Erf          | Ets2 repressor factor                                                                                                    | 0,61 | 0,53 | 0,87 |
| ENSRNOG00000016760  | XM_226403          | KCTD19       | similar to hypothetical protein MGC2628                                                                                  | 0,61 | 0,30 | 0,45 |
| ENSRNOG00000025327  | NM_053423          | Tert         | telomerase reverse transcriptase                                                                                         | 0,61 | 0,23 | 0,19 |
| ENSRNOG000000009754 | NM_177928          | Nampt        | nicotinamide phosphoribosyltransferase                                                                                   | 0,61 | 0,48 | 0,71 |
| ENSRNOG00000027263  | XM_001076509.3     | RGD1562550   | PREDICTED: Rattus norvegicus transmembrane protein C5orf28 homolog (RGD1562550)                                          | 0,61 | 0,44 | 0,63 |
| ENSRNOG00000020102  | XM_227426          | RFX5         | regulatory factor X, 5 (influences HLA class II expression) (predicted)                                                  | 0,61 | 0,40 | 0,63 |
| ENSRNOG00000026559  | XM_214440          | XM_214440    | protein tyrosine phosphatase domain containing 1 (predicted)                                                             | 0,60 | 0,31 | 0,45 |
| ENSRNOG00000023449  | Rn.125816          | ATG9B        | ATG9 autophagy related 9 homolog B (S. cerevisiae)                                                                       | 0,60 | 0,19 | 0,11 |
| ENSRNOG00000019369  | NM_001009292       | Giyd2        | GIY-YIG domain containing 2                                                                                              | 0,60 | 0,21 | 0,19 |
| ENSRNOG00000021483  | XM_226563          | XM_226563    | similar to TRIM9-like protein TNL                                                                                        | 0,60 | 0,19 | 0,11 |
| ENSRNOG000000009090 | NM_138910          | DAD1         | defender against cell death 1                                                                                            | 0,60 | 0,27 | 0,38 |
| ENSRNOG00000019956  | XM_233441          | JMJD2A       | jumonji domain containing 2A (predicted)                                                                                 | 0,60 | 0,35 | 0,51 |
| ENSRNOG00000008067  | XM_234546          | Rcor1        | REST corepressor 1                                                                                                       | 0,60 | 0,40 | 0,63 |
| ENSRNOG00000018648  | XM_341627          | Mppe1        | metallophosphoesterase 1                                                                                                 | 0,60 | 0,23 | 0,26 |
| ENSRNOG00000019651  | NM_019229          | Slc12a4      | solute carrier family 12 (potassium/chloride transporters), member 4                                                     | 0,60 | 0,11 | 0,00 |
| ENSRNOG00000015082  | XM_219247          | Nalp10       | NACHT, leucine rich repeat and PYD containing 10 (predicted)                                                             | 0,60 | 0,20 | 0,11 |
| ENSRNOG00000027490  | NM_001000191       | NM_001000191 | olfactory receptor gene Olr203                                                                                           | 0,60 | 0,30 | 0,38 |
| ENSRNOG000000009709 | Rn.140607          | LOC287569    | similar to FLJ34922 protein                                                                                              | 0,60 | 0,13 | 0,08 |
| ENSRNOG00000018751  | XM_215051          | Cog7         | component of oligomeric golgi complex 7                                                                                  | 0,60 | 0,28 | 0,38 |
| ENSRNOG00000006787  | XM_216452          | Dhcr24       | 24-dehydrocholesterol reductase                                                                                          | 0,60 | 0,37 | 0,51 |
| ENSRNOG00000010550  | NM_001008376       | Trappc3      | trafficking protein particle complex 3                                                                                   | 0,60 | 0,31 | 0,45 |
| ENSRNOG00000002390  | NM_130734          | gnb2l1       | guanine nucleotide binding protein (G protein), beta polypeptide 2 like 1                                                | 0,60 | 0,32 | 0,45 |
| ENSRNOG00000018074  | NM_133295.3        | Ces1d        | carboxylesterase 1D (Ces1d)                                                                                              | 0,60 | 0,22 | 0,19 |
| ENSRNOG00000019837  | XM_343482          | XM_343482    | similar to GDP-mannose pyrophosphorylase B isoform 2; mannose-1-phosphate guanylyltransferase; amphoterin in             | 0,60 | 0,12 | 0,08 |
| ENSRNOG00000022967  | XM_216462          | Slc35d1      | solute carrier family 35 (UDP-glucuronic acid/UDP-N-acetylgalactosamine dual transporter), member D1                     | 0,60 | 0,19 | 0,11 |
| ENSRNOG00000011875  | NM_012879          | Slc2A2       | solute carrier family 2 (facilitated glucose transporter), member 2                                                      | 0,60 | 0,26 | 0,38 |
| ENSRNOG00000015302  | XM_343472          | Cis          | Cytokine-inducible SH2-containing protein (CIS) (CIS-1) (SOCS)                                                           | 0,60 | 0,57 | 1,22 |
| ENSRNOG00000021343  | XM_228529          | LOC680578    | similar to hypothetical protein FLJ13611                                                                                 | 0,60 | 0,24 | 0,26 |
| ENSRNOG00000016692  | XM_232942          | hsl2         | hydroxysteroid dehydrogenase like 2                                                                                      | 0,60 | 0,59 | 0,92 |
| ENSRNOG00000018886  | 1110018J18Rik      | LOC498685    | RIKEN cDNA 1110018J18 gene                                                                                               | 0,60 | 0,22 | 0,19 |
| ENSRNOG00000019705  | NM_017143          | nd           | coagulation factor 10                                                                                                    | 0,60 | 0,22 | 0,19 |
| ENSRNOG00000028144  | NM_022504          | nd           | ribosomal protein L36                                                                                                    | 0,60 | 0,29 | 0,38 |
| ENSRNOG00000023468  | NM_020098          | NM_020098    | piccolo (presynaptic cytomatrix protein)                                                                                 | 0,60 | 0,40 | 0,63 |
| ENSRNOG00000020546  | NM_012859          | Lipe         | lipase, hormone sensitive                                                                                                | 0,60 | 0,19 | 0,19 |
| ENSRNOG00000026140  | XM_213131          | XM_213131    | similar to 60S RIBOSOMAL PROTEIN L13                                                                                     | 0,60 | 0,09 | 0,00 |
| ENSRNOG00000019754  | XM_003750951.1     | Ttyh2        | tweety homolog 2 (Drosophila), transcript variant 1 (Ttyh2)                                                              | 0,60 | 0,31 | 0,45 |
| ENSRNOG00000013292  | XM_003750647.1     | LOC100910336 | PREDICTED: Rattus norvegicus 40S ribosomal protein S19-like (LOC100910336)                                               | 0,60 | 0,16 | 0,11 |
| ENSRNOG000000009005 | NM_053557.1        | Prmt3        | protein arginine methyltransferase 3 (Prmt3)                                                                             | 0,60 | 0,40 | 0,63 |

|                      |                    |              |                                                                                                                       |       |      |      |
|----------------------|--------------------|--------------|-----------------------------------------------------------------------------------------------------------------------|-------|------|------|
| ENSRNOG00000026963   | NM_001012197       | Tra1         | tumor rejection antigen gp96                                                                                          | 0,60  | 0,32 | 0,45 |
| ENSRNOG00000019335   | NM_001012199       | NM_001012199 | RAN GTPase activating protein 1 (predicted)                                                                           | 0,59  | 0,25 | 0,26 |
| ENSRNOG00000021133   | XM_341841          | Lsm14a       | LSM14A, SCD6 homolog A (S. cerevisiae)                                                                                | 0,59  | 0,33 | 0,45 |
| ENSRNOG00000015236   | NM_031668          | Mybbp1a      | MYB binding protein (P160) 1a                                                                                         | 0,59  | 0,30 | 0,45 |
| ENSRNOG00000022655   | ENSRNOG00000022655 | LOC501166    | similar to Hnrpa3 protein                                                                                             | 0,59  | 0,21 | 0,19 |
| ENSRNOG00000026109   | NM_024363          | PRMT1        | protein arginine methyltransferase 1                                                                                  | 0,59  | 0,13 | 0,08 |
| ENSRNOG00000001288   | NM_001109062.1     | Gpr146       | G protein-coupled receptor 146 (Gpr146)                                                                               | 0,59  | 0,10 | 0,00 |
| ENSRNOG00000008577   | XM_213526          | FBF1         | Fas (TNFRSF6) binding factor 1 (predicted)                                                                            | 0,59  | 0,29 | 0,45 |
| ENSRNOG00000020599   | XM_224740          | Tssk6        | testis-specific serine kinase 6                                                                                       | 0,59  | 0,41 | 0,63 |
| ENSRNOG00000006331   | NM_134382          | Elov15       | ELOVL family member 5, elongation of long chain fatty acids (yeast)                                                   | 0,59  | 0,15 | 0,11 |
| ENSRNOG00000015460   | XM_217458          | LOC691066    | transmembrane 4 L six family member 20                                                                                | 0,59  | 0,36 | 0,51 |
| ENSRNOG00000020635   | XM_218343          | Exosc5       | exosome component 5                                                                                                   | 0,59  | 0,34 | 0,51 |
| ENSRNOG00000018166   | NM_022627          | PRKAB2       | protein kinase, AMP-activated, beta 2 non-catalytic subunit                                                           | 0,59  | 0,13 | 0,11 |
| ENSRNOG00000016975   | NM_172223          | Pxmp4        | peroxisomal membrane protein 4                                                                                        | 0,59  | 0,57 | 1,22 |
| ENSRNOG00000015699   | XM_217385          | LMAN2L       | lectin, mannose-binding 2-like (predicted)                                                                            | 0,59  | 0,45 | 0,71 |
| ENSRNOG00000025185   | XM_345335          | Nup188       | nucleoporin 188                                                                                                       | 0,59  | 0,28 | 0,45 |
| ENSRNOG00000009458   | XM_221202          | nd           | similar to mitochondrial ribosomal protein L12                                                                        | 0,59  | 0,20 | 0,19 |
| ENSRNOG00000020011   | NM_001013072       | sfxn2        | sideroflexin 2                                                                                                        | 0,59  | 0,44 | 0,71 |
| ENSRNOG00000010728   | NM_001109307.2     | Stradb       | STE20-related kinase adaptor beta (Stradb)                                                                            | 0,59  | 0,28 | 0,45 |
| Down-regulated genes |                    |              |                                                                                                                       |       |      |      |
| ENSRNOG00000000033   | XM_223107          | Tmcc2        | transmembrane and coiled-coil domain family 2                                                                         | -0,59 | 0,19 | 0,26 |
| ENSRNOG00000005905   | NM_017031          | Pde4b        | phosphodiesterase 4B, cAMP specific                                                                                   | -0,59 | 0,53 | 1,71 |
| ENSRNOG00000000983   | NM_145724          | ZNF394       | zinc finger protein 394                                                                                               | -0,59 | 0,20 | 0,26 |
| ENSRNOG00000011630   | NM_017135          | Ak3l1        | adenylate kinase 3-like 1                                                                                             | -0,59 | 0,26 | 0,45 |
| ENSRNOG00000018214   | NM_017312          | Bok          | BCL2-related ovarian killer                                                                                           | -0,59 | 0,12 | 0,13 |
| ENSRNOG00000013291   | NM_031839          | Cyp2c23      | cytochrome P450 2C23                                                                                                  | -0,59 | 0,42 | 0,71 |
| ENSRNOG00000002397   | XM_223046          | Slc30a10     | solute carrier family 30, member 10                                                                                   | -0,59 | 0,08 | 0,00 |
| ENSRNOG00000017150   | XM_214417          | MED10        | mediator complex subunit 10                                                                                           | -0,59 | 0,30 | 0,51 |
| ENSRNOG00000019467   | NM_001106534.2     | Fer1l4       | fer-1-like 4 (C. elegans) (Fer1l4)                                                                                    | -0,59 | 0,08 | 0,00 |
| ENSRNOG00000028517   | NM_001007649       | MGC94282     | similar to 5930416l19Rik protein                                                                                      | -0,59 | 0,28 | 0,45 |
| ENSRNOG00000016648   | NM_022220          | Gulo         | gulonolactone (L-) oxidase                                                                                            | -0,59 | 0,43 | 0,87 |
| ENSRNOG00000000445   | NM_001002805.2     | C4b          | complement component 4B (Chido blood group) (C4b)                                                                     | -0,59 | 0,35 | 0,63 |
| ENSRNOG00000016339   | NM_053768          | Uox          | urate oxidase                                                                                                         | -0,59 | 0,37 | 0,63 |
| ENSRNOG00000009977   | NM_001009693       | Thrap3       | thyroid hormone receptor associated protein 3                                                                         | -0,59 | 0,20 | 0,26 |
| ENSRNOG00000010788   | NM_001100851.1     | Kmt2e        | lysine (K)-specific methyltransferase 2E (Kmt2e)                                                                      | -0,59 | 0,15 | 0,13 |
| ENSRNOG00000002100   | XM_214017          | Srp72        | similar to signal recognition particle,72 kDa subunit                                                                 | -0,59 | 0,15 | 0,13 |
| ENSRNOG00000003370   | NM_013078          | OTC          | ornithine carbamoyltransferase                                                                                        | -0,59 | 0,26 | 0,38 |
| ENSRNOG00000011413   | NM_138508          | scp2         | sterol carrier protein 2                                                                                              | -0,59 | 0,44 | 0,87 |
| ENSRNOG00000001804   | NM_031046          | Itpr2        | inositol 1,4,5-triphosphate receptor, type 2                                                                          | -0,60 | 0,15 | 0,13 |
| ENSRNOG00000002203   | XM_223187          | LIN54        | lin-54 homolog (C. elegans)                                                                                           | -0,60 | 0,17 | 0,13 |
| ENSRNOG00000014376   | NM_012803          | Proc         | protein C                                                                                                             | -0,60 | 0,23 | 0,26 |
| ENSRNOG00000014566   | NM_001013105       | FKBP11       | FK506 binding protein 11                                                                                              | -0,60 | 0,07 | 0,00 |
| ENSRNOG00000002258   | XM_341190          | RGD1306105   | similar to RIKEN cDNA 2610318G18                                                                                      | -0,60 | 0,18 | 0,19 |
| ENSRNOG00000017059   | XM_215222          | Cetn2        | centrin 2                                                                                                             | -0,60 | 0,18 | 0,19 |
| ENSRNOG00000010895   | NM_001004248       | TMEM30A      | transmembrane protein 30A                                                                                             | -0,60 | 0,15 | 0,13 |
| ENSRNOG00000021084   | Rn.162497          | Mpeg1        | macrophage expressed gene 1                                                                                           | -0,60 | 0,34 | 0,51 |
| ENSRNOG00000001853   | NM_053842          | ERK-2        | mitogen-activated protein kinase 1 (extracellular signal-regulated kinase 2) (P42-MAPK)                               | -0,60 | 0,22 | 0,26 |
| ENSRNOG00000002636   | Rn.10090           | Abat         | 4-aminobutyrate aminotransferase                                                                                      | -0,60 | 0,18 | 0,13 |
| ENSRNOG00000001736   | Rn.36635           | Bdh1         | 3-hydroxybutyrate dehydrogenase, type 1                                                                               | -0,60 | 0,20 | 0,19 |
| ENSRNOG00000018293   | Rn.136895          | LOC362012    | family with sequence similarity 40, member A                                                                          | -0,60 | 0,28 | 0,45 |
| ENSRNOG00000008374   | Rn.103205          | Nipsnap1     | 4-nitrophenylphosphatase domain and non-neuronal SNAP25-like protein homolog 1 (C. elegans)                           | -0,60 | 0,48 | 0,87 |
| ENSRNOG00000010352   | Rn.162234          | Dnajc3       | DnaJ (Hsp40) homolog, subfamily C, member 3                                                                           | -0,60 | 0,17 | 0,13 |
| ENSRNOG00000023491   | NM_001013185.1     | Adck3        | aarF domain containing kinase 3 (Adck3), nuclear gene encoding mitochondrial protein                                  | -0,60 | 0,54 | 1,22 |
| ENSRNOG00000004702   | Rn.10347           | Cpg1         | candidate plasticity gene 1                                                                                           | -0,60 | 0,15 | 0,13 |
| ENSRNOG00000017003   | Rn.199986          | PLXNA1       | Plxna1                                                                                                                | -0,60 | 0,24 | 0,38 |
| ENSRNOG00000008427   | Rn.56102           | Necap2       | NECAP endocytosis associated 2                                                                                        | -0,60 | 0,13 | 0,13 |
| ENSRNOG00000010765   | NM_001107248.1     | Vcl          | vinculin (Vcl)                                                                                                        | -0,60 | 0,19 | 0,19 |
| ENSRNOG00000009740   | Rn.45744           | Slco1c1      | solute carrier organic anion transporter family, member 1c1                                                           | -0,60 | 0,16 | 0,13 |
| ENSRNOG00000016000   | Rn.3689            | Atp5f1       | ATP synthase, H+ transporting, mitochondrial F0 complex, subunit B1                                                   | -0,60 | 0,20 | 0,19 |
| ENSRNOG00000023035   | Rn.16772           | RGD1305158   | similar to RIKEN cDNA 1810030N24                                                                                      | -0,61 | 0,32 | 0,45 |
| ENSRNOG00000003095   | Rn.6346            | Fgfbp1       | fibroblast growth factor binding protein 1                                                                            | -0,61 | 0,26 | 0,38 |
| ENSRNOG00000000964   | Rn.162293          | Frg1         | FSHD region gene 1; similar to FRG1 protein (FSHD region gene 1 protein)                                              | -0,61 | 0,22 | 0,26 |
| ENSRNOG00000018368   | NM_001000403       | Olr847       | olfactory receptor 847 (Olr847)                                                                                       | -0,61 | 0,21 | 0,19 |
| ENSRNOG00000013246   | NM_001107317.2     | Mboat4       | membrane bound O-acyltransferase domain containing 4 (Mboat4)                                                         | -0,61 | 0,36 | 0,63 |
| ENSRNOG00000023091   | Rn.195964          | RGD1561704   | similar to 60S ribosomal protein L27a (L29)                                                                           | -0,61 | 0,26 | 0,38 |
| ENSRNOG00000022239   | Rn.18571           | Tusc5        | tumor suppressor candidate 5                                                                                          | -0,61 | 0,27 | 0,38 |
| ENSRNOG00000001301   | NM_053845.1        | Upb1         | ureidopropionase, beta (Upb1)                                                                                         | -0,61 | 0,37 | 0,63 |
| ENSRNOG00000027392   | Rn.123033          | RGD1565512   | similar to hypothetical protein 4932418E24                                                                            | -0,61 | 0,25 | 0,26 |
| ENSRNOG00000004245   | Rn.1916            | Mgst3        | microsomal glutathione S-transferase 3                                                                                | -0,61 | 0,36 | 0,51 |
| ENSRNOG00000018204   | Rn.10140           | Slc28a2      | similar to solute carrier family 28, member 2; solute carrier family 28 (sodium-coupled nucleoside transporter), meml | -0,61 | 0,13 | 0,13 |
| ENSRNOG00000014438   | XM_001057586.2     | Atp5hl1      | PREDICTED: Rattus norvegicus ATP synthase, H+ transporting, mitochondrial Fo complex, subunit d-like 1 (Atp5hl1       | -0,61 | 0,15 | 0,13 |
| ENSRNOG00000000962   | Rn.10770           | Slc15a4      | solute carrier family 15, member 4                                                                                    | -0,61 | 0,05 | 0,00 |
| ENSRNOG00000002208   | Rn.15243           | Shrm3        | shroom family member 3                                                                                                | -0,61 | 0,08 | 0,00 |
| ENSRNOG00000019094   | NM_177426          | Gstm2        | glutathione S-transferase mu 2                                                                                        | -0,61 | 0,20 | 0,19 |
| ENSRNOG00000014540   | RGD1309621         | RGD1309621   | PREDICTED: Rattus norvegicus similar to hypothetical protein FLJ10652 (RGD1309621)                                    | -0,61 | 0,15 | 0,13 |
| ENSRNOG00000017064   | Rn.161910          | TDRD1        | tudor domain containing 1                                                                                             | -0,61 | 0,14 | 0,13 |
| ENSRNOG00000026511   | NM_001048075       | Clec2d11     | similar to osteoclast inhibitory lectin                                                                               | -0,61 | 0,28 | 0,38 |
| ENSRNOG00000015812   | Rn.24712           | Tm4sf1       | transmembrane 4 L six family member 1                                                                                 | -0,61 | 0,20 | 0,19 |
| ENSRNOG00000017156   | Rn.200834          | ANKLE1       | Ankle1                                                                                                                | -0,61 | 0,07 | 0,00 |
| ENSRNOG00000015772   | Rn.154877          | Metap2       | similar to Methionine aminopeptidase 2 (MetAP 2)                                                                      | -0,62 | 0,12 | 0,08 |
| ENSRNOG00000012946   | Rn.198614          | CAPZA1       | Moloney leukemia virus 10                                                                                             | -0,62 | 0,19 | 0,19 |
| ENSRNOG00000012091   | Rn.37581           | Ppa2         | pyrophosphatase (inorganic) 2                                                                                         | -0,62 | 0,27 | 0,38 |
| ENSRNOG00000007172   | XM_343006          | MAP4K3       | mitogen-activated protein kinase kinase kinase kinase 3                                                               | -0,62 | 0,15 | 0,17 |
| ENSRNOG00000005627   | XM_216369.3        | LOC297970    | PREDICTED: Rattus norvegicus similar to LRRGT00057 (LOC297970)                                                        | -0,62 | 0,19 | 0,13 |

|                      |                |              |                                                                                              |       |      |      |
|----------------------|----------------|--------------|----------------------------------------------------------------------------------------------|-------|------|------|
| ENSRNOG00000017107   | XM_226468.7    | Hydin        | PREDICTED: Rattus norvegicus Hydin, axonemal central pair apparatus protein (Hydin)          | -0,62 | 0,22 | 0,19 |
| ENSRNOG00000002132   | XM_003751325.1 | LOC100912618 | PREDICTED: Rattus norvegicus ubiquitin-conjugating enzyme E2 variant 1-like (LOC100912618)   | -0,62 | 0,29 | 0,38 |
| ENSRNOG00000015989   | Rn.13489       | Mrpl32       | 39S ribosomal protein L32, mitochondrial                                                     | -0,62 | 0,22 | 0,19 |
| ENSRNOG00000003709   | Rn.35029       | Kmo          | Kynurenine 3-monooxygenase                                                                   | -0,62 | 0,37 | 0,51 |
| ENSRNOG00000019441   | Rn.109394      | Hsd3b6       | hydroxy-delta-5-steroid dehydrogenase, 3 beta- and steroid delta-isomerase 6                 | -0,62 | 0,28 | 0,38 |
| ENSRNOG00000003592   | Rn.34860       | Med28        | mediator complex subunit 28                                                                  | -0,62 | 0,12 | 0,08 |
| ENSRNOG00000019585   | Rn.127898      | MYST1        | MYST histone acetyltransferase 1                                                             | -0,62 | 0,16 | 0,13 |
| ENSRNOG000000002783  | Rn.11698       | SerpinC1     | serine (or cysteine) peptidase inhibitor, clade C (antithrombin), member 1                   | -0,63 | 0,20 | 0,13 |
| ENSRNOG00000017872   | Rn.154031      | LOC688778    | fatty aldehyde dehydrogenase-like                                                            | -0,63 | 0,21 | 0,19 |
| ENSRNOG000000009330  | Rn.74591       | Slc17a5      | solute carrier family 17 (anion/sugar transporter), member 5                                 | -0,63 | 0,32 | 0,45 |
| ENSRNOG000000002265  | Rn.10019       | Casr         | calcium-sensing receptor                                                                     | -0,63 | 0,14 | 0,08 |
| ENSRNOG000000009696  | Rn.90967       | Mdm4         | Mdm4 p53 binding protein homolog (mouse)                                                     | -0,63 | 0,12 | 0,08 |
| ENSRNOG000000003492  | Rn.17160       | Gas7         | growth arrest specific 7                                                                     | -0,63 | 0,08 | 0,00 |
| ENSRNOG00000012146   | Rn.99801       | LOC681879    | protein-O-mannosyltransferase 2; serine palmitoyltransferase, long chain base subunit 2      | -0,63 | 0,15 | 0,13 |
| ENSRNOG000000025653  | NM_001134886.1 | Vps13b       | vacuolar protein sorting 13 homolog B (yeast) (Vps13b)                                       | -0,63 | 0,19 | 0,13 |
| ENSRNOG000000028568  | XM_002727906.3 | Myh15        | PREDICTED: Rattus norvegicus myosin, heavy chain 15 (Myh15)                                  | -0,63 | 0,27 | 0,26 |
| ENSRNOG00000016689   | XM_002728762.2 | Fanci        | PREDICTED: Rattus norvegicus Fanconi anemia, complementation group I (Fanci)                 | -0,63 | 0,33 | 0,45 |
| ENSRNOG000000006709  | Rn.11295       | Pzp          | pregnancy-zone protein                                                                       | -0,63 | 0,32 | 0,45 |
| ENSRNOG000000001823  | NM_147205      | siat1        | ST6 beta-galactosamide alpha-2,6-sialyltransferase 1                                         | -0,63 | 0,30 | 0,38 |
| ENSRNOG00000013683   | Rn.109455      | Edg1         | sphingosine-1-phosphate receptor 1                                                           | -0,63 | 0,51 | 0,87 |
| ENSRNOG000000001756  | Rn.101441      | LOC690043    | UBX domain protein 7; ring finger protein 168                                                | -0,63 | 0,26 | 0,26 |
| ENSRNOG000000000669  | NM_001108340.1 | Hscb         | HscB iron-sulfur cluster co-chaperone homolog (E. coli) (Hscb)                               | -0,63 | 0,21 | 0,13 |
| ENSRNOG000000002236  | NM_057147.2    | Sec22a       | SEC22 vesicle trafficking protein homolog A (S. cerevisiae) (Sec22a)                         | -0,63 | 0,21 | 0,13 |
| ENSRNOG000000007218  | NM_001126081.1 | Leap2        | liver-expressed antimicrobial peptide 2                                                      | -0,63 | 0,59 | 1,22 |
| ENSRNOG00000019485   | Rn.31976       | Bckdk        | branched chain ketoacid dehydrogenase kinase                                                 | -0,63 | 0,13 | 0,08 |
| ENSRNOG000000004844  | Rn.3694        | Thrap6       | mediator complex subunit 30                                                                  | -0,63 | 0,17 | 0,13 |
| ENSRNOG000000001056  | Rn.162080      | Snapc2       | small nuclear RNA activating complex, polypeptide 2                                          | -0,63 | 0,04 | 0,00 |
| ENSRNOG000000000982  | Rn.24025       | Znf498       | zinc finger protein 498; zinc finger protein 655; zinc finger with KRAB and SCAN domains 5   | -0,64 | 0,13 | 0,08 |
| ENSRNOG00000018760   | Rn.34512       | Mpp7         | membrane protein, palmitoylated 7 (MAGUK p55 subfamily member 7)                             | -0,64 | 0,49 | 0,71 |
| ENSRNOG00000018186   | Rn.3763        | Hbxip        | hepatitis B virus x interacting protein                                                      | -0,64 | 0,16 | 0,08 |
| ENSRNOG0000000021407 | NM_001135600.1 | Cyp4v3       | cytochrome P450, family 4, subfamily v, polypeptide 3 (Cyp4v3)                               | -0,64 | 0,49 | 0,87 |
| ENSRNOG0000000020748 | Rn.211012      | MAP4         | microtubule-associated protein 4                                                             | -0,64 | 0,19 | 0,13 |
| ENSRNOG00000019058   | NM_020540      | GST          | glutathione S-transferase mu 3; GST mu 4; GST mu 7                                           | -0,64 | 0,06 | 0,00 |
| ENSRNOG000000000981  | Rn.29435       | Cd36l1       | scavenger receptor class B, member 1                                                         | -0,64 | 0,19 | 0,13 |
| ENSRNOG0000000028545 | Rn.162901      | RGD1309696   | similar to KIAA2019 protein                                                                  | -0,64 | 0,26 | 0,26 |
| ENSRNOG000000006423  | Rn.129677      | cycA         | peptidylprolyl isomerase A (cyclophilin A) (P31) (p1B15)                                     | -0,64 | 0,23 | 0,19 |
| ENSRNOG00000013118   | Rn.11992       | Atox1        | ATX1 antioxidant protein 1 homolog (yeast)                                                   | -0,65 | 0,42 | 0,63 |
| ENSRNOG000000003626  | NM_019383      | atp5h        | ATP synthase D chain, mitochondrial                                                          | -0,65 | 0,18 | 0,13 |
| ENSRNOG000000004685  | Rn.94848       | MTA3         | metastasis associated 1 family, member 3                                                     | -0,65 | 0,20 | 0,13 |
| ENSRNOG000000002104  | NM_001037347   | SFRS15       | splicing factor, arginine/serine-rich 15                                                     | -0,65 | 0,17 | 0,17 |
| ENSRNOG00000014739   | NM_173109      | Wfdc2        | WAP four-disulfide core domain 2                                                             | -0,65 | 0,72 | 2,38 |
| ENSRNOG000000000453  | NM_001004084.2 | RT1-Bb       | RT1 class II, locus Bb (RT1-Bb)                                                              | -0,65 | 0,31 | 0,38 |
| ENSRNOG00000012121   | Rn.3965        | Sdf2         | stromal cell derived factor 2                                                                | -0,65 | 0,27 | 0,19 |
| ENSRNOG000000002176  | Rn.56373       | Pvrl3        | poliovirus receptor-related 3                                                                | -0,65 | 0,16 | 0,08 |
| ENSRNOG000000004329  | NM_199208.1    | Rdh16        | retinol dehydrogenase 16 (all-trans) (Rdh16)                                                 | -0,66 | 0,14 | 0,00 |
| ENSRNOG00000017776   | XM_003752949.1 | LOC100912731 | PREDICTED: Rattus norvegicus zinc finger protein 120-like (LOC100912731)                     | -0,66 | 0,17 | 0,08 |
| ENSRNOG000000008421  | Rn.13334       | Klhl5        | kelch-like 5 (Drosophila)                                                                    | -0,66 | 0,28 | 0,26 |
| ENSRNOG00000014664   | Rn.102580      | RGD1559904   | 1110037F02Rik                                                                                | -0,66 | 0,17 | 0,00 |
| ENSRNOG000000008050  | Rn.38669       | Stac3        | SH3 and cysteine rich domain 3                                                               | -0,66 | 0,95 | 4,78 |
| ENSRNOG000000028494  | XR_147004.1    | LOC366782    | PREDICTED: Rattus norvegicus 60S ribosomal protein L7-like (LOC366782)                       | -0,66 | 0,27 | 0,19 |
| ENSRNOG000000002878  | Rn.214035      | Afm          | afamin                                                                                       | -0,66 | 0,33 | 0,38 |
| ENSRNOG000000007177  | Rn.98686       | Kdelc2       | KDEL (Lys-Asp-Glu-Leu) containing 2                                                          | -0,66 | 0,14 | 0,00 |
| ENSRNOG000000001061  | Rn.12933       | MGC94142     | Rab interacting lysosomal protein-like 2                                                     | -0,66 | 0,13 | 0,00 |
| ENSRNOG000000001730  | Rn.198269      | Centb2       | ArfGAP with coiled-coil, ankyrin repeat and PH domains 2                                     | -0,67 | 0,30 | 0,26 |
| ENSRNOG000000007233  | Rn.3472        | Qpc          | ubiquinol-cytochrome c reductase, complex III subunit VII                                    | -0,67 | 0,18 | 0,08 |
| ENSRNOG000000020035  | Rn.10172       | Cyp17a1      | cytochrome P450 17A1                                                                         | -0,67 | 0,86 | 2,99 |
| ENSRNOG00000018340   | Rn.68511       | Marveld2     | MARVEL domain containing 2                                                                   | -0,67 | 0,19 | 0,08 |
| ENSRNOG00000015660   | Rn.11773       | Pex3         | peroxisomal biogenesis factor 3                                                              | -0,67 | 0,49 | 0,71 |
| ENSRNOG00000019466   | Rn.55456       | Agpat2       | 1-acylglycerol-3-phosphate O-acyltransferase 2 (lysophosphatidic acid acyltransferase, beta) | -0,67 | 0,10 | 0,00 |
| ENSRNOG00000013296   | XM_215562      | mgst2        | microsomal glutathione S-transferase 2                                                       | -0,67 | 0,22 | 0,11 |
| ENSRNOG000000002240  | Rn.137795      | Dirc2        | disrupted in renal carcinoma 2 (human)                                                       | -0,67 | 0,23 | 0,13 |
| ENSRNOG00000012904   | NM_001108792.1 | Bend6        | BEN domain containing 6 (Bend6)                                                              | -0,67 | 0,19 | 0,13 |
| ENSRNOG000000003941  | NM_057114.1    | Prdx1        | peroxiredoxin 1 (Prdx1)                                                                      | -0,67 | 0,16 | 0,08 |
| ENSRNOG000000002182  | NM_001107208.2 | Sept11       | septin-11 (Sept11)                                                                           | -0,67 | 0,17 | 0,08 |
| ENSRNOG000000000451  | Rn.25717       | HLA-DMB      | RT1 class II, locus Ba                                                                       | -0,67 | 0,43 | 0,51 |
| ENSRNOG00000013704   | Rn.53968       | Cps1         | carbamoyl-phosphate synthetase 1, mitochondrial                                              | -0,67 | 0,30 | 0,26 |
| ENSRNOG00000017820   | Rn.7882        | Nqo2         | NAD(P)H dehydrogenase, quinone 2                                                             | -0,67 | 0,03 | 0,00 |
| ENSRNOG00000015518   | Rn.108214      | Rbp4         | retinol binding protein 4, plasma                                                            | -0,67 | 0,27 | 0,19 |
| ENSRNOG00000018267   | Rn.165018      | B3GNT7       | UDP-GlcNAc:betaGal beta-1,3-N-acetylglucosaminyltransferase 7                                | -0,67 | 0,28 | 0,19 |
| ENSRNOG000000001388  | Rn.9918        | Sds          | serine dehydratase                                                                           | -0,68 | 0,27 | 1,25 |
| ENSRNOG000000000901  | Rn.9449        | Crcp         | calcitonin gene-related peptide-receptor component protein                                   | -0,68 | 0,29 | 0,19 |
| ENSRNOG00000019924   | Rn.9490        | THOP1        | thimet oligopeptidase 1                                                                      | -0,68 | 0,69 | 1,71 |
| ENSRNOG000000007142  | Rn.88274       | B3gat1       | beta-1,3-glucuronyltransferase 1 (glucuronosyltransferase P)                                 | -0,68 | 0,16 | 0,08 |
| ENSRNOG000000004679  | Rn.67791       | Fign         | fidgetin                                                                                     | -0,68 | 0,15 | 0,00 |
| ENSRNOG0000000024005 | XM_001058335.3 | LOC501421    | PREDICTED: Rattus norvegicus hypothetical gene supported by BC082068 (LOC501421)             | -0,68 | 0,45 | 0,63 |
| ENSRNOG000000007793  | Rn.10967       | Pnrc1        | proline-rich nuclear receptor coactivator 1                                                  | -0,68 | 0,35 | 0,38 |
| ENSRNOG00000017843   | Rn.92563       | Polr3k       | polymerase (RNA) III (DNA directed) polypeptide K, 12.3 kDa                                  | -0,68 | 0,11 | 0,00 |
| ENSRNOG000000003624  | XM_216369.3    | LOC297970    | PREDICTED: Rattus norvegicus similar to LRRGT00057 (LOC297970)                               | -0,68 | 0,35 | 0,38 |
| ENSRNOG000000026078  | NM_001000238   | Olr302       | olfactory receptor 302 (Olr302)                                                              | -0,68 | 0,45 | 0,51 |
| ENSRNOG000000026487  | XM_001078374.2 | LOC686736    | PREDICTED: Rattus norvegicus histone H3.3-like, transcript variant 1 (LOC686736)             | -0,68 | 0,12 | 0,00 |
| ENSRNOG000000001426  | Rn.44767       | LOC498171    | Prkr interacting protein 1 (IL11 inducible)                                                  | -0,69 | 0,20 | 0,08 |
| ENSRNOG000000007241  | XM_230291      | FNBP4        | formin binding protein 4                                                                     | -0,69 | 0,13 | 0,00 |
| ENSRNOG000000002212  | Rn.25104       | Hsd17b13     | hydroxysteroid (17-beta) dehydrogenase 13                                                    | -0,69 | 0,11 | 0,00 |
| ENSRNOG0000000025510 | NM_198776      | LOC100134871 | beta-globin; beta globin minor gene                                                          | -0,69 | 0,40 | 0,45 |



|                     |                |              |                                                                                                                |       |      |      |
|---------------------|----------------|--------------|----------------------------------------------------------------------------------------------------------------|-------|------|------|
| ENSRNOG00000018722  | NM_001109569.1 | Wdr74        | WD repeat domain 74 (Wdr74)                                                                                    | -0,69 | 0,86 | 2,99 |
| ENSRNOG00000027441  | XM_003752050.1 | LOC100911008 | PREDICTED: Rattus norvegicus histone-lysine N-methyltransferase MLL3-like (LOC100911008)                       | -0,69 | 0,94 | 3,73 |
| ENSRNOG00000011864  | Rn.98783       | Gm2a         | GM2 ganglioside activator                                                                                      | -0,69 | 0,38 | 0,38 |
| ENSRNOG00000012971  | NM_130409.2    | Cfh          | complement factor H (Cfh), nuclear gene encoding mitochondrial protein                                         | -0,69 | 0,26 | 0,13 |
| ENSRNOG00000022588  | Rn.145502      | Akr1c12      | aldo-keto reductase family 1, member C12                                                                       | -0,70 | 0,11 | 0,00 |
| ENSRNOG00000003606  | Rn.195622      | RGD1561381   | similar to microsomal glutathione S-transferase 3                                                              | -0,70 | 0,43 | 0,45 |
| ENSRNOG00000011184  | Rn.162743      | Slc13a4      | solute carrier family 13 (sodium/sulfate symporters), member 4                                                 | -0,70 | 0,23 | 0,13 |
| ENSRNOG00000000955  | Rn.162084      | Ln timer     | ligand of numb-protein X 2                                                                                     | -0,70 | 0,23 | 0,13 |
| ENSRNOG00000025625  | Rn.1742        | Rnase4       | ribonuclease, RNase A family 4                                                                                 | -0,71 | 0,13 | 0,00 |
| ENSRNOG00000001926  | Rn.24293       | Cldn1        | claudin 1                                                                                                      | -0,71 | 0,36 | 0,26 |
| ENSRNOG00000022992  | NM_001024753.1 | Ifit2        | interferon-induced protein with tetratricopeptide repeats 2 (Ifit2)                                            | -0,71 | 0,15 | 0,00 |
| ENSRNOG00000015774  | Rn.163080      | MREG         | melanoregulin                                                                                                  | -0,71 | 0,43 | 0,45 |
| ENSRNOG00000000533  | NM_001025727.1 | Rnf8         | ring finger protein 8, E3 ubiquitin protein ligase (Rnf8)                                                      | -0,72 | 0,34 | 0,26 |
| ENSRNOG00000020793  | NM_001025405   | RUVBL2       | RuvB-like 2 (E. coli); similar to RuvB-like 2; similar to RuvB-like 2 (p47 protein)                            | -0,72 | 0,25 | 0,13 |
| ENSRNOG00000003253  | Rn.241         | Qdpr         | quinoid dihydropteridine reductase                                                                             | -0,72 | 0,42 | 0,38 |
| ENSRNOG00000005437  | Rn.6987        | Hrsp12       | heat-responsive protein 12                                                                                     | -0,72 | 0,15 | 0,00 |
| ENSRNOG00000000931  | XM_222111      | SFRS8        | splicing factor, arginine/serine-rich 8                                                                        | -0,72 | 0,17 | 0,00 |
| ENSRNOG00000028587  | XM_003752566.1 | LOC100911504 | PREDICTED: Rattus norvegicus uncharacterized LOC100911504 (LOC100911504)                                       | -0,72 | 0,24 | 0,13 |
| ENSRNOG00000002234  | XM_223390.7    | Atp8a1       | PREDICTED: Rattus norvegicus ATPase, aminophospholipid transporter (APLT), class I, type 8A, member 1 (Atp8a1) | -0,72 | 0,23 | 0,08 |
| ENSRNOG00000001000  | NM_001105907.2 | Trrap        | transformation/transcription domain-associated protein (Trrap)                                                 | -0,72 | 0,20 | 0,08 |
| ENSRNOG00000001852  | XM_216309      | RGD1310606   | Ergic2                                                                                                         | -0,72 | 0,22 | 0,08 |
| ENSRNOG00000017063  | Rn.20051       | Fcna         | ficolin (collagen/fibrinogen domain containing) 1                                                              | -0,73 | 0,12 | 0,00 |
| ENSRNOG00000019556  | Rn.2091        | Cd9          | CD9 molecule                                                                                                   | -0,73 | 0,39 | 0,26 |
| ENSRNOG00000002289  | Rn.178819      | ILDR1        | immunoglobulin-like domain containing receptor 1                                                               | -0,74 | 0,11 | 0,00 |
| ENSRNOG00000005513  | NM_019257      | SRP40        | splicing factor, arginine/serine-rich 5                                                                        | -0,74 | 0,24 | 0,08 |
| ENSRNOG00000003142  | Rn.154415      | Fcgr3        | Fc fragment of IgG, low affinity IIb, receptor (CD32); Fc fragment of IgG, low affinity IIa, receptor (CD32)   | -0,75 | 0,24 | 0,08 |
| ENSRNOG00000019425  | Rn.189363      | GABARAPL2    | GABA(A) receptor-associated protein like 2                                                                     | -0,75 | 0,27 | 0,13 |
| ENSRNOG00000028563  | XM_216369.3    | LOC297970    | PREDICTED: Rattus norvegicus similar to LRRGT00057 (LOC297970)                                                 | -0,75 | 0,31 | 0,13 |
| ENSRNOG00000000534  | NM_001025059   | TBC1D22B     | TBC1 domain family, member 22B                                                                                 | -0,75 | 0,18 | 0,00 |
| ENSRNOG00000020676  | Rn.73852       | Ppp1r14a     | protein phosphatase 1, regulatory (inhibitor) subunit 14A                                                      | -0,75 | 0,06 | 0,00 |
| ENSRNOG00000018742  | Rn.10732       | Klk11        | kallikrein related-peptidase 11                                                                                | -0,75 | 0,63 | 0,71 |
| ENSRNOG00000025815  | Rn.145144      | CDR2L        | cerebellar degeneration-related protein 2-like                                                                 | -0,76 | 0,61 | 0,71 |
| ENSRNOG00000014155  | XM_215564      | spg20        | spastic paraplegia 20, spartin (Troyer syndrome) homolog (human)                                               | -0,76 | 0,28 | 0,13 |
| ENSRNOG00000003662  | NM_024381      | GK           | glycerol kinase (ATP:Glycerol 3-phosphotransferase) (glycerokinase) (GK) (ASTP)                                | -0,76 | 0,36 | 0,19 |
| ENSRNOG00000019482  | Rn.90161       | Gnao         | guanine nucleotide binding protein (G protein), alpha activating activity polypeptide O                        | -0,77 | 0,04 | 0,00 |
| ENSRNOG00000027448  | XM_243815.5    | Foxr1        | PREDICTED: Rattus norvegicus forkhead box R1 (Foxr1)                                                           | -0,77 | 0,47 | 0,38 |
| ENSRNOG00000018735  | Rn.193175      | CD74         | Cd74 molecule, major histocompatibility complex, class II invariant chain                                      | -0,77 | 0,47 | 0,49 |
| ENSRNOG00000016660  | Rn.6686        | Cox5b        | cytochrome c oxidase subunit Vb                                                                                | -0,77 | 0,48 | 0,45 |
| ENSRNOG00000016286  | Rn.34836       | IYD          | iodotyrosine deiodinase                                                                                        | -0,77 | 0,52 | 0,45 |
| ENSRNOG00000026116  | Rn.99341       | Sal13        | sal-like 3 (Drosophila)                                                                                        | -0,78 | 0,19 | 0,00 |
| ENSRNOG00000004147  | XM_221100      | ABCA-1       | ATP-binding cassette, sub-family A (ABC1), member 8a                                                           | -0,78 | 0,36 | 0,13 |
| ENSRNOG00000005669  | Rn.22066       | Car8         | carbonic anhydrase 8                                                                                           | -0,78 | 0,30 | 0,13 |
| ENSRNOG00000019414  | Rn.13463       | TMEM79       | transmembrane protein 79                                                                                       | -0,78 | 0,07 | 0,00 |
| ENSRNOG00000001344  | Rn.101781      | Aldh2        | aldehyde dehydrogenase 2 family (mitochondrial)                                                                | -0,78 | 0,24 | 0,00 |
| ENSRNOG00000014806  | Rn.50364       | PNKD         | Pnkd                                                                                                           | -0,78 | 0,33 | 0,13 |
| ENSRNOG00000017531  | Rn.10030       | Akr1c18      | aldo-keto reductase family 1, member C18                                                                       | -0,78 | 0,36 | 0,19 |
| ENSRNOG00000014610  | Rn.11132       | Anpep        | alanyl (membrane) aminopeptidase                                                                               | -0,78 | 0,21 | 0,00 |
| ENSRNOG00000010906  | Rn.8019        | Ccl5         | chemokine (C-C motif) ligand 5                                                                                 | -0,79 | 0,31 | 0,13 |
| ENSRNOG00000018701  | Rn.163109      | Tpsg1        | tryptase gamma 1                                                                                               | -0,80 | 0,78 | 0,87 |
| ENSRNOG000000005931 | Rn.165717      | Pgcp         | plasma glutamate carboxypeptidase                                                                              | -0,80 | 0,26 | 0,00 |
| ENSRNOG000000007258 | Rn.144410      | RPESP        | RPE-spondin                                                                                                    | -0,81 | 0,24 | 0,00 |
| ENSRNOG00000017619  | Rn.6132        | ALDH2        | aldehyde dehydrogenase 1 family, member A1                                                                     | -0,81 | 0,24 | 0,00 |
| ENSRNOG00000014635  | Rn.112599      | Cita         | clathrin, light chain (Lca)                                                                                    | -0,81 | 0,27 | 0,00 |
| ENSRNOG000000000025 | NM_131906.1    | Slco1a2      | solute carrier organic anion transporter family, member 1A2 (Slco1a2)                                          | -0,82 | 0,21 | 0,00 |
| ENSRNOG000000000814 | NM_030832      | FABP7        | fatty acid binding protein 7, brain                                                                            | -0,82 | 0,80 | 0,87 |
| ENSRNOG000000009096 | Rn.16469       | Pon3         | paraoxonase 3                                                                                                  | -0,82 | 0,10 | 0,00 |
| ENSRNOG000000000064 | NM_080481      | ATP5IAtp5k   | ATP synthase, H+ transporting, mitochondrial F0 complex, subunit E                                             | -0,82 | 0,13 | 0,00 |
| ENSRNOG00000016271  | Rn.107335      | Itm2b        | integral membrane protein 2B                                                                                   | -0,82 | 0,06 | 0,00 |
| ENSRNOG000000007507 | NM_001100963.1 | Aass         | aminoadipate-semialdehyde synthase (Aass), nuclear gene encoding mitochondrial protein                         | -0,82 | 0,52 | 0,38 |
| ENSRNOG000000027508 | NM_001108906.1 | Chmp2a       | charged multivesicular body protein 2A (Chmp2a)                                                                | -0,82 | 0,65 | 0,63 |
| ENSRNOG00000011794  | Rn.11547       | Tcea3        | transcription elongation factor A (SII), 3                                                                     | -0,82 | 0,71 | 0,71 |
| ENSRNOG00000016641  | Rn.103609      | Actl7a       | actin-like 7a                                                                                                  | -0,83 | 0,44 | 0,19 |
| ENSRNOG000000006042 | Rn.198813      | Rup2         | urinary protein 2                                                                                              | -0,83 | 0,76 | 0,87 |
| ENSRNOG000000005612 | NM_019287      | ApoB         | apolipoprotein B (fragment)                                                                                    | -0,83 | 0,32 | 0,08 |
| ENSRNOG000000009019 | Rn.9968        | Slc6a6       | solute carrier family 6 (neurotransmitter transporter, taurine)                                                | -0,83 | 0,40 | 0,13 |
| ENSRNOG00000001062  | NM_001246665.1 | Setd8        | SET domain containing (lysine methyltransferase) 8 (Setd8)                                                     | -0,83 | 0,28 | 0,00 |
| ENSRNOG00000014568  | Rn.2867        | LOC681418    | NADH dehydrogenase (ubiquinone) 1 beta subcomplex, 10                                                          | -0,84 | 0,23 | 0,00 |
| ENSRNOG00000001060  | Rn.79076       | SNRNP35      | U11/U12 snRNP 35K                                                                                              | -0,84 | 0,18 | 0,00 |
| ENSRNOG00000016684  | Rn.30163       | RGD1307284   | similar to protein kinase, lysine deficient 1; kinase deficient protein                                        | -0,85 | 0,49 | 0,26 |
| ENSRNOG00000014604  | Rn.1129        | Oprs1        | opioid receptor, sigma 1                                                                                       | -0,85 | 0,37 | 0,13 |
| ENSRNOG00000019982  | Rn.14691       | Ethe1        | ethylmalonic encephalopathy 1                                                                                  | -0,86 | 0,68 | 0,51 |
| ENSRNOG000000001851 | Rn.162778      | FAR2         | fatty acyl CoA reductase 2                                                                                     | -0,86 | 0,75 | 0,71 |
| ENSRNOG00000019532  | Rn.1470        | MGC93975     | similar to 2310044H10Rik protein                                                                               | -0,86 | 0,44 | 0,13 |
| ENSRNOG00000016620  | Rn.10082       | Csnk1g1      | casein kinase 1, gamma 1                                                                                       | -0,87 | 0,48 | 0,19 |
| ENSRNOG00000017223  | Rn.20178       | Plg          | plasminogen                                                                                                    | -0,88 | 0,25 | 0,00 |
| ENSRNOG00000010935  | Rn.12572       | Cpb2         | carboxypeptidase B2 (plasma)                                                                                   | -0,88 | 0,36 | 0,08 |
| ENSRNOG000000003357 | Rn.3247        | Col3a1       | collagen, type III, alpha 1                                                                                    | -0,89 | 0,31 | 0,00 |
| ENSRNOG00000012929  | Rn.18535       | Wsb1         | WD repeat and SOCS box-containing 1                                                                            | -0,90 | 0,56 | 0,26 |
| ENSRNOG00000017891  | NM_134380.1    | Ust5r        | integral membrane transport protein UST5r (Ust5r)                                                              | -0,90 | 0,66 | 0,45 |
| ENSRNOG000000002210 | Rn.102059      | Dhrs8        | hydroxysteroid (17-beta) dehydrogenase 11                                                                      | -0,90 | 0,23 | 0,00 |
| ENSRNOG00000014766  | Rn.102781      | Galt         | galactose-1-phosphate uridylyltransferase                                                                      | -0,92 | 0,30 | 0,19 |
| ENSRNOG000000001827 | Rn.131140      | Masp1        | mannan-binding lectin serine peptidase 1                                                                       | -0,93 | 0,28 | 0,00 |
| ENSRNOG00000018937  | Rn.6036        | GST m3       | glutathione S-transferase mu 3; GST mu 4; GST mu 7                                                             | -0,94 | 0,22 | 0,00 |
| ENSRNOG00000024745  | Rn.107041      | LOC259245    | alpha 2u globulin; major urinary protein 5 (MUP)                                                               | -0,94 | 1,08 | 1,22 |

|                     |                |              |                                                                                                     |       |      |      |
|---------------------|----------------|--------------|-----------------------------------------------------------------------------------------------------|-------|------|------|
| ENSRNOG00000025764  | NM_138826      | MT1A         | Metallothionein-1                                                                                   | -0,94 | 1,02 | 1,22 |
| ENSRNOG00000022280  | XM_217566      | SH3BGRL      | SH3 domain binding glutamic acid-rich protein like                                                  | -0,95 | 0,16 | 0,00 |
| ENSRNOG00000017562  | NM_001033958.2 | Obp3         | alpha-2u globulin PGCL4 (Obp3), transcript variant 2                                                | -0,95 | 0,59 | 0,26 |
| ENSRNOG00000003515  | Rn.3603        | Ephx1        | epoxide hydrolase 1, microsomal                                                                     | -0,95 | 0,39 | 0,04 |
| ENSRNOG00000017236  | NM_001033697.1 | Akr1c1       | aldo-keto reductase family 1, member C1 (Akr1c1)                                                    | -0,96 | 0,88 | 1,08 |
| ENSRNOG00000015740  | Rn.101837      | RNF125       | ring finger protein 125                                                                             | -0,96 | 0,43 | 0,08 |
| ENSRNOG000000027489 | Rn.141215      | MN1          | meningioma 1                                                                                        | -0,96 | 0,86 | 0,63 |
| ENSRNOG000000008638 | NM_001025065   | Angptl3      | angiopoietin-like 3                                                                                 | -0,97 | 0,15 | 0,00 |
| ENSRNOG00000019470  | Rn.198611      | Hao2         | hydroxyacid oxidase 2 (long chain)                                                                  | -0,98 | 0,40 | 0,00 |
| ENSRNOG00000011269  | Rn.9937        | Sult1c1      | sulfotransferase family, cytosolic, 1C, member 3                                                    | -0,98 | 0,43 | 0,08 |
| ENSRNOG000000027129 | NM_001109356.1 | Sdr16c6      | short chain dehydrogenase/reductase family 16C, member 6 (Sdr16c6)                                  | -0,98 | 1,13 | 1,22 |
| ENSRNOG00000004725  | Rn.6044        | Ela1         | chymotrypsin-like elastase family, member 1                                                         | -0,99 | 0,13 | 0,00 |
| ENSRNOG00000019459  | Rn.266         | ODC-az1      | ornithine decarboxylase antizyme 1                                                                  | -0,99 | 0,30 | 0,00 |
| ENSRNOG000000008364 | Rn.3001        | Cat          | catalase                                                                                            | -0,99 | 0,34 | 0,00 |
| ENSRNOG00000010658  | Rn.3881        | Cth          | cystathionase (cystathionine gamma-lyase)                                                           | -1,00 | 0,57 | 0,13 |
| ENSRNOG00000016635  | XM_003751985.1 | LOC100910532 | PREDICTED: Rattus norvegicus uncharacterized LOC100910532 (LOC100910532)                            | -1,00 | 0,69 | 0,26 |
| ENSRNOG00000016614  | NM_023101.1    | Vti1a        | vesicle transport through interaction with t-SNAREs homolog 1A (yeast)                              | -1,01 | 0,57 | 0,13 |
| ENSRNOG000000006388 | Rn.21399       | Pygl         | phosphorylase, glycogen, liver                                                                      | -1,03 | 0,41 | 0,00 |
| ENSRNOG000000005109 | Rn.45197       | Rprm         | reprimo, TP53 dependent G2 arrest mediator candidate                                                | -1,03 | 0,26 | 0,00 |
| ENSRNOG00000013736  | Rn.10252       | C9           | complement component 9                                                                              | -1,03 | 0,13 | 0,00 |
| ENSRNOG00000014565  | Rn.162464      | Lcmt1        | leucine carboxyl methyltransferase 1                                                                | -1,03 | 0,09 | 0,00 |
| ENSRNOG00000018756  | NM_138826      | MT           | Metallothionein-I (MT-I)                                                                            | -1,03 | 1,03 | 0,71 |
| ENSRNOG00000005604  | NM_019287      | Apo          | apolipoprotein BL (fragment)                                                                        | -1,03 | 0,36 | 0,00 |
| ENSRNOG000000009301 | NM_001010921   | GST          | Glutathione S-transferase 8 (GST 8-8) (CHAIN 8) (GST class-alpha)                                   | -1,06 | 0,38 | 0,00 |
| ENSRNOG00000010040  | NM_001012122.1 | Tymp         | thymidine phosphorylase                                                                             | -1,09 | 0,19 | 0,00 |
| ENSRNOG00000012458  | Rn.1372        | Cyp2e1       | cytochrome P450 2E1                                                                                 | -1,09 | 0,32 | 0,00 |
| ENSRNOG00000013004  | Rn.25716       | Akr1d1       | aldo-keto reductase family 1, member D1 (delta 4-3-ketosteroid-5-beta-reductase)                    | -1,11 | 0,50 | 0,00 |
| ENSRNOG000000001809 | Rn.16100       | Hrg          | histidine-rich glycoprotein; similar to histidine-rich glycoprotein                                 | -1,11 | 0,53 | 0,00 |
| ENSRNOG000000020528 | NM_001007722   | Hba2         | alpha-2-globin chain                                                                                | -1,12 | 0,89 | 0,45 |
| ENSRNOG00000018275  | Rn.100336      | Errfi1       | ERBB receptor feedback inhibitor 1                                                                  | -1,14 | 0,73 | 0,19 |
| ENSRNOG000000025660 | NM_138514      | CYP2C13      | Cytochrome P450 2C13, male-specific (CYP11C13)                                                      | -1,14 | 0,41 | 0,00 |
| ENSRNOG00000018237  | Rn.87063       | GST p2       | glutathione-S-transferase, pi 1                                                                     | -1,15 | 0,29 | 0,00 |
| ENSRNOG00000011200  | Rn.11406       | Bhmt         | betaine-homocysteine methyltransferase                                                              | -1,16 | 0,93 | 0,38 |
| ENSRNOG000000020817 | Rn.9867        | Cyp2a2       | cytochrome P450 2A1                                                                                 | -1,16 | 0,05 | 0,00 |
| ENSRNOG000000002304 | XM_002724613.2 | Tnfrsf13b    | PREDICTED: Rattus norvegicus tumor necrosis factor receptor superfamily, member 13B (Tnfrsf13b)     | -1,17 | 0,11 | 0,00 |
| ENSRNOG000000023116 | Rn.152690      | TMEM195      | transmembrane protein 195                                                                           | -1,20 | 0,13 | 0,00 |
| ENSRNOG00000013464  | Rn.9767        | Spink1       | serine peptidase inhibitor, Kazal type 3; serine peptidase inhibitor, Kazal type 1                  | -1,23 | 0,30 | 0,00 |
| ENSRNOG000000000978 | NM_153312      | CP3A2        | cytochrome P450 3A1 (CYP11A1) (P450-PCN1)                                                           | -1,26 | 0,30 | 0,00 |
| ENSRNOG000000000768 | NM_053299      | UBD          | ubiquitin D                                                                                         | -1,26 | 0,87 | 0,19 |
| ENSRNOG000000005861 | Rn.185798      | Hsd11b1      | hydroxysteroid 11-beta dehydrogenase 1                                                              | -1,27 | 0,31 | 0,00 |
| ENSRNOG00000013279  | NM_031841      | Scd2         | Acyl-CoA desaturase 2 (Stearoyl-CoA desaturase 2) (Fatty acid desaturase 2) (Delta(9)-desaturase 2) | -1,30 | 1,41 | 0,71 |
| ENSRNOG000000020529 | NM_013096.1    | Hba1         | hemoglobin, alpha 1 (Hba1)                                                                          | -1,33 | 0,33 | 0,00 |
| ENSRNOG000000009273 | NM_001033959.2 | Obp3         | alpha-2u globulin PGCL4 (Obp3), transcript variant 3                                                | -1,38 | 1,01 | 0,19 |
| ENSRNOG000000000969 | Rn.32085       | Cyp3a18      | cytochrome P450 3A18                                                                                | -1,43 | 0,59 | 0,00 |
| ENSRNOG00000023986  | XM_003754685.1 | LOC100912405 | urinary protein 3-like (LOC100912405)                                                               | -1,47 | 0,58 | 0,00 |
| ENSRNOG00000019417  | Rn.197811      | Hsd3b5       | 3 beta-hydroxysteroid dehydrogenase type 3 (3Beta-HSD III)                                          | -1,52 | 0,60 | 0,00 |
| ENSRNOG000000009438 | Rn.2374        | Serpina6     | serine (or cysteine) peptidase inhibitor, clade A, member 6                                         | -1,54 | 0,77 | 0,00 |
| ENSRNOG00000013410  | NM_152936.1    | Spink1       | serine peptidase inhibitor, Kazal type 1 (Spink1)                                                   | -2,36 | 0,76 | 0,00 |
| ENSRNOG00000010079  | NM_019292      | Ca3          | carbonic anhydrase 3                                                                                | -3,15 | 0,60 | 0,00 |
| ENSRNOG000000001957 | NM_001007718   | Ste          | sulfotransferase family 1E; estrogen sulfotransferase                                               | -3,80 | 0,68 | 0,00 |

**Table S2. Hepatic genes regulated by E2 in hypothyroid-orchidectomized rats.** The administrations of vehicle (TXOX) or E2 (TXOXE2) to TXOX rats were described in Material and Methods. Then, differently expressed genes in the livers were identified by DNA microarrays. The analysis is based on the SAM statistical technique and differentially-expressed genes were discovered using a FDR less than 5% and a mean ratio of log2 > |0.58|. The table shows ENSEMBL gene ID, Unigene/Refseq, gene symbol, gene description, R (TXOXE2/TXOX), SD, and q(%).
