# Supplementary material
Source: publisher figshare collection journal article supplement (https://plos.figshare.com/articles/dataset/_/1022100)
Supplement: Supplementary file [file 1]

| ENSEMBL ID          | Unigene/Refseq      | Symbol       | Gene description                                                                       | R         |     | q(%) |
|---------------------|---------------------|--------------|----------------------------------------------------------------------------------------|-----------|-----|------|
|                     |                     |              |                                                                                        | mean ± SD |     |      |
| Up-regulated        |                     |              |                                                                                        |           |     |      |
| ENSRNOG00000010478  | NM_182474.1         | SPI1         | Serine protease inhibitor                                                              | 4,5       | 1,0 | 0,00 |
| ENSRNOG000000024772 | XM_221075           | Cpsf4l       | cleavage and polyadenylation specific factor 4-like                                    | 4,3       | 1,3 | 0,00 |
| ENSRNOG000000009142 | NM_198784           | MUP          | alpha-2u globulin (MUP 4)                                                              | 3,6       | 1,1 | 0,00 |
| ENSRNOG000000005764 | NM_147213           | PGCL5        | alpha-2u globulin PGCL5                                                                | 3,6       | 0,9 | 0,00 |
| ENSRNOG000000012896 | NM_019184           | Cyp2c11      | cytochrome P450 2C11 (mephenytoin 4-hydroxylase)                                       | 3,3       | 0,6 | 0,00 |
| ENSRNOG000000025056 | XM_234428           | CN16B        | similar to chromosome 14 open reading frame 166B                                       | 3,3       | 1,0 | 0,00 |
| ENSRNOG000000017489 | XM_226533           | Gse1         | genetic suppressor element 1                                                           | 3,2       | 1,0 | 0,00 |
| ENSRNOG000000008965 | NM_058208           | SOCS-2       | suppressor of cytokine signaling 2                                                     | 3,0       | 1,1 | 0,00 |
| ENSRNOG000000013093 | NM_017158           | Cyp2c7       | cytochrome P450, family 2, subfamily c, polypeptide 7                                  | 2,3       | 0,8 | 0,00 |
| ENSRNOG000000025106 | XM_344693           | nd           | similar to peroxiredoxin 1                                                             | 2,2       | 0,6 | 0,00 |
| ENSRNOG000000027784 | NM_001009965        | TSKU         | tsukushin; similar to hepatic protein EIIH                                             | 2,1       | 0,6 | 0,00 |
| ENSRNOG000000021354 | NM_017158.2         | Cyp2c7       | cytochrome P450, family 2, subfamily c, polypeptide 7                                  | 2,0       | 0,4 | 0,00 |
| ENSRNOG000000006042 | Rn.198813           | Rup2         | urinary protein 2                                                                      | 1,9       | 0,6 | 0,00 |
| ENSRNOG000000020528 | NM_001007722.1      | Hba2         | hemoglobin, alpha 2                                                                    | 1,9       | 0,5 | 0,00 |
| ENSRNOG000000013275 | NM_203325.1         | Mup5         | major urinary protein 5 (Mup5)                                                         | 1,8       | 0,5 | 0,00 |
| ENSRNOG000000019630 | NM_053493           | HACL1        | 2-hydroxyacyl-CoA lyase 1                                                              | 1,8       | 0,2 | 0,00 |
| ENSRNOG000000008999 | NM_147212.1         | PGCL3        | alpha-2u globulin PGCL3 (LOC259244),                                                   | 1,7       | 0,9 | 0,00 |
| ENSRNOG000000025079 | NM_001025710        | FAM126B      | family with sequence similarity 126, member B                                          | 1,7       | 0,5 | 0,00 |
| ENSRNOG000000028734 | NM_017158           | Cyp2c7       | cytochrome P450, family 2, subfamily c, polypeptide 7                                  | 1,6       | 0,4 | 0,00 |
| ENSRNOG000000008095 | NM_022671           | Hnf6         | one cut homeobox 1 (HNF-6)                                                             | 1,6       | 0,5 | 0,00 |
| ENSRNOG000000009160 | ENSRNOG000000009160 | nd           | novel gene                                                                             | 1,5       | 0,5 | 0,00 |
| ENSRNOG000000014447 | NM_012565           | GCK          | glucokinase                                                                            | 1,5       | 0,5 | 0,00 |
| ENSRNOG000000014365 | NM_053765           | Gne          | glucosamine (UDP-N-acetyl)-2-epimerase/N-acetylmannosamine kinase                      | 1,5       | 0,2 | 0,00 |
| ENSRNOG000000021310 | XM_220441           | Slc36A3      | solute carrier family 36 (proton/amino acid symporter), member 3                       | 1,5       | 0,4 | 0,00 |
| ENSRNOG000000012926 | NM_001000754        | Olr363       | olfactory receptor 363                                                                 | 1,5       | 0,6 | 0,00 |
| ENSRNOG000000001979 | NM_153724           | RCAN1        | Down syndrome critical region homolog 1 (human)                                        | 1,5       | 0,6 | 0,00 |
| ENSRNOG000000010298 | NM_001004210        | HTF          | X-box binding protein 1                                                                | 1,4       | 0,1 | 0,00 |
| ENSRNOG000000020529 | NM_013096           | nd           | hemoglobin alpha-1 and alpha-2 chains                                                  | 1,4       | 0,3 | 0,00 |
| ENSRNOG000000019470 | NM_032082           | HAO2         | hydroxyacid oxidase 2 (long chain)                                                     | 1,4       | 0,2 | 0,00 |
| ENSRNOG000000025127 | NM_017177.1         | Chkb         | choline kinase beta (Chkb)                                                             | 1,4       | 0,5 | 0,00 |
| ENSRNOG000000013090 | XM_237999           | Gadd45g      | growth arrest and DNA-damage-inducible, gamma                                          | 1,4       | 0,9 | 0,77 |
| ENSRNOG000000016791 | NM_017127           | CHKA         | choline kinase alpha                                                                   | 1,3       | 0,2 | 0,00 |
| ENSRNOG000000021336 | NM_001107752.2      | Ttc17        | tetratricopeptide repeat domain 17 (Ttc17)                                             | 1,3       | 0,2 | 0,00 |
| ENSRNOG000000022157 | XM_225266.5         | Serpnb6e     | serine (or cysteine) peptidase inhibitor, clade B, member 6e (Serpnb6e)                | 1,3       | 0,9 | 0,77 |
| ENSRNOG000000021380 | Rn.163176           | FADS6        | fatty acid desaturase domain family, member 6                                          | 1,3       | 0,2 | 0,00 |
| ENSRNOG000000009474 | XM_221037           | DDX42        | DEAD (Asp-Glu-Ala-Asp) box polypeptide 42                                              | 1,3       | 0,5 | 0,00 |
| ENSRNOG000000017914 | NM_134449           | Prkcdbp      | protein kinase C, delta binding protein                                                | 1,2       | 0,3 | 0,00 |
| ENSRNOG000000010337 | NM_031746           | Slc13A2      | solute carrier family 13 (sodium-dependent dicarboxylate transporter), member 2 (Ntcp) | 1,2       | 0,2 | 0,00 |
| ENSRNOG000000026645 | XM_003751433.1      | LOC100911429 | uncharacterized LOC100911429 (LOC100911429)                                            | 1,2       | 0,3 | 0,00 |
| ENSRNOG000000016122 | NM_013134           | HMGCR        | 3-hydroxy-3-methylglutaryl-Coenzyme A reductase                                        | 1,1       | 0,4 | 0,00 |
| ENSRNOG000000007949 | NM_031546           | RC           | regucalcin (senescence marker protein-30)                                              | 1,1       | 0,4 | 0,00 |
| ENSRNOG000000016595 | NM_024385           | HHEX         | hematopoietically expressed homeobox                                                   | 1,1       | 0,3 | 0,00 |
| ENSRNOG000000016044 | NM_001106456.1      | Mab21l3      | mab-21-like 3 (C. elegans) (Mab21l3),                                                  | 1,1       | 0,2 | 0,00 |
| ENSRNOG000000020928 | NM_019303           | Cyp2a1       | cytochrome P450 2A1 (hepatic steroid hydroxylase IIA1) gene                            | 1,1       | 0,2 | 0,00 |
| ENSRNOG000000005661 | NM_024351.2         | Hspa8        | heat shock 70kDa protein 8 (Hspa8)                                                     | 1,1       | 0,3 | 0,00 |
| ENSRNOG000000020480 | NM_053445           | Fads1        | fatty acid desaturase 1                                                                | 1,1       | 0,7 | 0,77 |
| ENSRNOG000000017962 | NM_199085           | SERPINB6     | serine (or cysteine) peptidase inhibitor, clade B, member 6a                           | 1,0       | 0,7 | 1,02 |
| ENSRNOG000000010269 | NM_021653           | nd           | type I iodothyronine deiodinase (type-I 5'deiodinase) (DIOI) (TYPE 1 DI) (5DI)         | 1,0       | 0,1 | 0,00 |
| ENSRNOG000000007395 | NM_017300           | BAAT         | bile acid CoA: amino acid N-acyltransferase (glycine N-choloyltransferase)             | 1,0       | 0,3 | 0,16 |
| ENSRNOG000000019656 | NM_001012047        | BTD          | biotinidase                                                                            | 1,0       | 0,3 | 0,00 |
| ENSRNOG000000022180 | XM_002725097.2      | LOC100364618 | hypothetical protein LOC100364618 (LOC100364618)                                       | 1,0       | 0,6 | 0,77 |
| ENSRNOG000000013409 | NM_017305           | GCLM         | glutamate cysteine ligase, modifier subunit                                            | 1,0       | 0,3 | 0,00 |
| ENSRNOG000000024848 | NM_001008724        | FGA          | fibrinogen alpha chain                                                                 | 1,0       | 0,2 | 0,00 |
| ENSRNOG000000009052 | XM_231739           | IGF2BP3      | insulin-like growth factor 2 mRNA binding protein 3                                    | 1,0       | 0,6 | 1,02 |
| ENSRNOG000000004332 | NM_031507           | EGFR         | epidermal growth factor receptor                                                       | 0,9       | 0,4 | 0,33 |
| ENSRNOG000000020950 | Rn.162486           | SYVN1        | synovial apoptosis inhibitor 1, synoviolin                                             | 0,9       | 0,3 | 0,00 |
| ENSRNOG000000025087 | NM_001008808        | KRT73        | keratin 73                                                                             | 0,9       | 0,5 | 0,71 |
| ENSRNOG000000009284 | NM_012742           | Hnf3a        | forkhead box A1                                                                        | 0,9       | 0,3 | 0,00 |
| ENSRNOG000000004329 | NM_199208.1         | Rdh16        | retinol dehydrogenase 16 (all-trans) (Rdh16)                                           | 0,9       | 0,4 | 0,33 |
| ENSRNOG000000009303 | ENSRNOG000000009303 | ZWILCH       | Zwilch, kinetochore associated, homolog (Drosophila)                                   | 0,9       | 0,4 | 0,62 |
| ENSRNOG000000007420 | NM_017018           | HRH1         | histamine receptor H 1                                                                 | 0,9       | 0,6 | 1,04 |
| ENSRNOG000000010270 | NM_019622           | ESPN         | espin                                                                                  | 0,9       | 0,3 | 0,00 |
| ENSRNOG000000009274 | NM_173308           | FUT11        | fucosyltransferase 11 (alpha (1,3) fucosyltransferase)                                 | 0,9       | 0,5 | 0,77 |
| ENSRNOG000000025140 | Rn.33031            | ZFAT         | zinc finger and AT hook domain containing                                              | 0,9       | 0,3 | 0,33 |
| ENSRNOG000000004517 | NM_178866           | IGF1         | insulin-like growth factor 1                                                           | 0,9       | 0,4 | 0,52 |
| ENSRNOG000000018420 | NM_053537           | OAT2         | solute carrier family 22 (organic anion transporter), member 7                         | 0,9       | 0,3 | 0,00 |
| ENSRNOG000000026448 | XM_344296           | nd           | similar to RIKEN cDNA 1110003E01                                                       | 0,9       | 0,2 | 0,00 |
| ENSRNOG000000009434 | XM_236574           | nd           | similar to RIKEN cDNA 1300017J02                                                       | 0,9       | 0,3 | 0,00 |
| ENSRNOG000000025510 | NM_198776           | nd           | beta-glo; beta-globin; beta globin minor gene                                          | 0,9       | 0,4 | 0,33 |
| ENSRNOG000000028096 | XM_347304           | Marveld1     | MARVEL domain containing 1                                                             | 0,9       | 0,6 | 1,47 |
| ENSRNOG000000019568 | NM_138875           | JUND         | Jun D proto-oncogene                                                                   | 0,9       | 0,6 | 1,04 |
| ENSRNOG000000014900 | NM_017334           | CREM         | cAMP responsive element modulator                                                      | 0,9       | 0,3 | 0,33 |
| ENSRNOG000000011269 | NM_031732           | SULT1C3      | sulfotransferase family, cytosolic, 1C, member 3                                       | 0,9       | 0,4 | 0,33 |
| ENSRNOG000000025440 | NM_001000075.1      | Olr1006      | olfactory receptor 1006 (Olr1006)                                                      | 0,9       | 0,4 | 0,71 |
| ENSRNOG000000015767 | XM_577371.4         | LOC501945    | uncharacterized LOC501945 (RGD1559628)                                                 | 0,9       | 0,3 | 0,00 |
| ENSRNOG000000018225 | XM_342551           | Trp53inp2    | tumor protein p53 inducible nuclear protein 2                                          | 0,9       | 0,3 | 0,00 |
| ENSRNOG000000023479 | XM_229609           | nd           | similar to RIKEN cDNA 1700001E04                                                       | 0,8       | 0,6 | 1,47 |
| ENSRNOG000000017204 | Rn.17290            | PQLC1        | PQ-loop repeat-containing protein 1                                                    | 0,8       | 0,1 | 0,00 |
| ENSRNOG000000012189 | XM_341486           | LECT2        | leukocyte cell-derived chemotaxin 2                                                    | 0,8       | 0,6 | 1,47 |
| ENSRNOG000000005615 | NM_024127           | GADD45       | growth arrest and DNA-damage-inducible, alpha                                          | 0,8       | 0,2 | 0,00 |
| ENSRNOG000000000786 | NM_001002831        | RPP21        | ribonuclease P 21 subunit (human)                                                      | 0,8       | 0,4 | 0,71 |
| ENSRNOG000000015061 | NM_053329.2         | IGF-ALS      | insulin-like growth factor binding protein, acid labile subunit (Igfals)               | 0,8       | 0,6 | 1,29 |
| ENSRNOG000000025074 | NM_012559           | FGG          | fibrinogen gamma chain                                                                 | 0,8       | 0,1 | 0,00 |
| ENSRNOG000000008988 | NM_012730           | Cyp2d2       | cytochrome P450 2D2                                                                    | 0,8       | 0,5 | 1,04 |

|                    |                    |              |                                                                                                                |     |     |      |
|--------------------|--------------------|--------------|----------------------------------------------------------------------------------------------------------------|-----|-----|------|
| ENSRNOG00000020420 | NM_012624          | PKLR         | pyruvate kinase, liver and RBC                                                                                 | 0,8 | 0,6 | 1,63 |
| ENSRNOG00000008510 | NM_134403          | ABTB2        | ankyrin repeat and BTB (POZ) domain containing 2                                                               | 0,8 | 0,0 | 0,00 |
| ENSRNOG00000008215 | XM_221124          | TRIM47       | tripartite motif-containing 47                                                                                 | 0,8 | 0,3 | 0,33 |
| ENSRNOG00000012190 | XM_236535          | CLDN2        | claudin 2                                                                                                      | 0,8 | 0,3 | 0,33 |
| ENSRNOG00000019262 | NM_001134565.1     | Trak1        | trafficking protein, kinesin binding 1 (Trak1)                                                                 | 0,8 | 0,1 | 0,00 |
| ENSRNOG00000022268 | Rn.162959          | Pnpla3       | patatin-like phospholipase domain containing 3                                                                 | 0,8 | 0,8 | 3,38 |
| ENSRNOG00000026316 | XM_343021          | WDR43        | WD repeat domain 43                                                                                            | 0,8 | 0,3 | 0,33 |
| ENSRNOG00000000221 | NM_212524          | ABHD5        | abhydrolase domain containing 5                                                                                | 0,8 | 0,2 | 0,00 |
| ENSRNOG00000015502 | XM_215693          | HIAT1        | hippocampus abundant gene transcript 1                                                                         | 0,8 | 0,2 | 0,00 |
| ENSRNOG00000012791 | NM_053503          | JUB          | jub, ajuba homolog (Xenopus laevis)                                                                            | 0,8 | 0,4 | 0,77 |
| ENSRNOG00000016496 | NM_017097          | CATC         | cathepsin C                                                                                                    | 0,8 | 0,1 | 0,00 |
| ENSRNOG00000013009 | NM_017025          | ldhA         | lactate dehydrogenase A (LDH-A) (LDH muscle subunit) (LDH-M)                                                   | 0,8 | 0,5 | 1,29 |
| ENSRNOG00000010309 | NM_031553          | NFYA         | nuclear transcription factor-Y beta                                                                            | 0,8 | 0,0 | 0,00 |
| ENSRNOG00000019681 | NM_021662          | Pold1        | polymerase (DNA directed), delta 1, catalytic subunit                                                          | 0,8 | 0,2 | 0,25 |
| ENSRNOG00000019996 | NM_012716          | Slc16A1      | solute carrier family 16, member 1 (monocarboxylic acid transporter 1)                                         | 0,8 | 0,1 | 0,00 |
| ENSRNOG00000017765 | XM_225548          | NET1         | neuroepithelial cell transforming 1                                                                            | 0,8 | 0,3 | 0,33 |
| ENSRNOG00000015456 | XM_344855          | Zfp787       | zinc finger protein 787                                                                                        | 0,8 | 0,2 | 0,00 |
| ENSRNOG00000019284 | NM_001134565.1     | Trak1        | trafficking protein, kinesin binding 1 (Trak1)                                                                 | 0,8 | 0,2 | 0,00 |
| ENSRNOG00000024802 | NM_058209.2        | Zfp37        | zinc finger protein 37 (Zfp37)                                                                                 | 0,8 | 0,2 | 0,00 |
| ENSRNOG00000013241 | XM_003748909.1     | Cyp2c7       | cytochrome P450 2C7-like (LOC100911552)                                                                        | 0,8 | 0,5 | 1,04 |
| ENSRNOG00000028653 | XM_213423          | nd           | similar to ribosomal protein L35a                                                                              | 0,8 | 0,2 | 0,33 |
| ENSRNOG00000013267 | XM_230961          | PRIC285      | similar to Peroxisomal proliferator-activated receptor A interacting complex 285 kDa protein (PPAR- $\alpha$ ) | 0,7 | 0,4 | 0,77 |
| ENSRNOG00000012882 | Rn.105436          | ANKRD27      | ankyrin repeat domain 27 (VPS9 domain)                                                                         | 0,7 | 0,2 | 0,25 |
| ENSRNOG00000008946 | NM_024139          | RGD1565588   | similar to calcium binding protein P22                                                                         | 0,7 | 0,2 | 0,33 |
| ENSRNOG00000017558 | NM_001109119.1     | Tubb2a       | tubulin, beta 2a                                                                                               | 0,7 | 0,4 | 1,29 |
| ENSRNOG00000010275 | XM_342601          | RGD1311940   | similar to bA305P22.2.1 (novel protein, isoform 1)                                                             | 0,7 | 0,3 | 0,71 |
| ENSRNOG00000015488 | XM_341908          | TEAD1        | TEA domain family member 1                                                                                     | 0,7 | 0,2 | 0,33 |
| ENSRNOG00000010264 | XM_342601          | nd           | similar to bA305P22.2.1 (novel protein, isoform 1) (predicted)                                                 | 0,7 | 0,3 | 0,71 |
| ENSRNOG00000008209 | NM_001013219       | ST3GAL1      | ST3 beta-galactoside alpha-2,3-sialyltransferase 1                                                             | 0,7 | 0,4 | 1,04 |
| ENSRNOG00000012913 | NM_199372          | Eif4a1       | eukaryotic translation initiation factor 4A, isoform 1                                                         | 0,7 | 0,2 | 0,33 |
| ENSRNOG00000017309 | XM_342944          | nd           | similar to chromosome 1 open reading frame 63                                                                  | 0,7 | 0,1 | 0,00 |
| ENSRNOG00000016091 | XM_237238          | TMEM169      | transmembrane protein 169                                                                                      | 0,7 | 0,3 | 0,77 |
| ENSRNOG00000011111 | XM_234430          | nd           | similar to mKIAA1737 protein                                                                                   | 0,7 | 0,4 | 1,47 |
| ENSRNOG00000007758 | XM_345770          | HSD17B6      | hydroxysteroid (17-beta) dehydrogenase 6                                                                       | 0,7 | 0,2 | 0,33 |
| ENSRNOG00000026558 | NM_145878          | FABP         | fatty acid-binding protein, (E-FABP) (cutaneous fatty acid-binding protein) (C-FABP) (DA11)                    | 0,7 | 0,3 | 0,77 |
| ENSRNOG00000023633 | XM_236253          | crabp1       | cellular retinoic acid binding protein 1                                                                       | 0,7 | 0,2 | 0,33 |
| ENSRNOG00000020468 | XM_214592          | Stard4       | StAR-related lipid transfer (START) domain containing 4                                                        | 0,7 | 0,2 | 0,33 |
| ENSRNOG00000023159 | XM_221123          | nd           | 40S ribosomal protein S18 (KE-3) (KE3)                                                                         | 0,7 | 0,2 | 0,62 |
| ENSRNOG00000027339 | XM_342164          | nd           | similar to Heph protein                                                                                        | 0,7 | 0,3 | 0,77 |
| ENSRNOG00000009088 | NM_031614          | TXNRD1       | thioredoxin reductase 1                                                                                        | 0,7 | 0,3 | 0,77 |
| ENSRNOG00000006400 | NM_001012152       | TBC1D14      | TBC1 domain family, member 14                                                                                  | 0,7 | 0,1 | 0,00 |
| ENSRNOG00000020351 | NM_145678          | VPS4A        | vacuolar protein sorting 4 homolog A (S. cerevisiae)                                                           | 0,7 | 0,3 | 1,02 |
| ENSRNOG00000014285 | XM_220743          | SSH2         | slingshot homolog 2 (Drosophila)                                                                               | 0,7 | 0,2 | 0,33 |
| ENSRNOG00000020266 | NM_017245          | EEF2         | similar to Elongation factor 2 (EF-2); eukaryotic translation elongation factor 2                              | 0,7 | 0,1 | 0,00 |
| ENSRNOG00000019213 | NM_022215          | Gpdh         | glycerol-3-phosphate dehydrogenase 1 (soluble)                                                                 | 0,7 | 0,3 | 0,77 |
| ENSRNOG00000017397 | NM_001012159       | UPF3A        | UPF3 regulator of nonsense transcripts homolog A (yeast)                                                       | 0,7 | 0,3 | 0,77 |
| ENSRNOG00000022749 | XM_212981          | nd           | cytochrome C, somatic                                                                                          | 0,7 | 0,1 | 0,00 |
| ENSRNOG00000002553 | XM_344241          | nd           | similar to RIKEN cDNA 1110003E01                                                                               | 0,7 | 0,4 | 1,02 |
| ENSRNOG00000013089 | NM_213626          | KIF13B       | kinesin 13B                                                                                                    | 0,7 | 0,1 | 0,00 |
| ENSRNOG00000022075 | NM_001114391.1     | Rpl7a        | ribosomal protein L7a                                                                                          | 0,7 | 0,2 | 0,33 |
| ENSRNOG00000022856 | XM_226891.6        | Dnah5        | PREDICTED: Rattus norvegicus dynein, axonemal, heavy chain 5                                                   | 0,7 | 0,1 | 0,25 |
| ENSRNOG00000025160 | XM_345284          | TMEM56       | transmembrane protein 56                                                                                       | 0,7 | 0,2 | 0,33 |
| ENSRNOG00000007545 | NM_199115          | ANGPTL4      | angiopoietin-like 4                                                                                            | 0,7 | 0,3 | 1,04 |
| ENSRNOG00000019834 | NM_001004082       | Hsp90ab1     | similar to Heat shock protein HSP 90-beta (HSP 84); heat shock protein 90kDa alpha (cytosolic), class B        | 0,7 | 0,2 | 0,33 |
| ENSRNOG00000025063 | XM_003751764.1     | LOC682469    | lysine-specific demethylase 3B-like (LOC682469)                                                                | 0,7 | 0,6 | 2,43 |
| ENSRNOG00000028259 | ENSRNOG00000028259 | nd           | similar to hypothetical protein LOC199675                                                                      | 0,7 | 0,1 | 0,25 |
| ENSRNOG00000019934 | NM_001014148.1     | Paip2        | poly(A) binding protein interacting protein 2 (Paip2)                                                          | 0,7 | 0,1 | 0,00 |
| ENSRNOG00000002005 | XM_573578.4        | Tmprss11f    | transmembrane protease, serine 11f (Tmprss11f)                                                                 | 0,7 | 0,4 | 1,63 |
| ENSRNOG00000022840 | NM_001166307.1     | LOC498592    | similar to CG32662-PA (LOC498592)                                                                              | 0,7 | 0,3 | 1,04 |
| ENSRNOG00000017330 | ENSRNOG00000017330 | Gm9905       | predicted gene 9905 [Source:MGI Symbol;Acc:MGI:3642311]                                                        | 0,7 | 0,2 | 0,33 |
| ENSRNOG00000016123 | Rn.163348          | Rnf144b      | ring finger protein 144B                                                                                       | 0,7 | 0,4 | 1,63 |
| ENSRNOG00000014055 | NM_053853          | NAT          | N-Acetyltransferase-2 (arylamine N-acetyltransferase); N-acetyltransferase 1 (arylamine N-acetyltransferase)   | 0,7 | 0,3 | 1,02 |
| ENSRNOG00000008079 | XM_214108          | UGP2         | UDP-glucose pyrophosphorylase 2                                                                                | 0,7 | 0,5 | 2,15 |
| ENSRNOG00000015544 | NM_001011995       | TUBA1C       | tubulin, alpha 1C                                                                                              | 0,7 | 0,2 | 0,62 |
| ENSRNOG00000016151 | XM_237094          | ANKRD23      | ankyrin repeat domain 23                                                                                       | 0,7 | 0,2 | 0,71 |
| ENSRNOG00000025185 | XM_345335          | Nup188       | nucleoporin 188                                                                                                | 0,6 | 0,1 | 0,33 |
| ENSRNOG00000025879 | XM_341252          | nd           | similar to ribosomal protein L13                                                                               | 0,6 | 0,1 | 0,25 |
| ENSRNOG00000008993 | NM_133514          | Mmp10        | stromelysin-1 precursor (matrix metalloproteinase-3) (MMP-3) (TRANSIN-1) (SL-1) (PTR1 PROTEIN)                 | 0,6 | 0,1 | 0,33 |
| ENSRNOG00000024015 | XM_216900          | nd           | similar to inner nuclear membrane protein                                                                      | 0,6 | 0,2 | 0,62 |
| ENSRNOG00000014727 | XM_220229          | FAHD1        | fumarylacetoacetate hydrolase domain containing 1                                                              | 0,6 | 0,4 | 1,63 |
| ENSRNOG00000019244 | NM_001007002       | MXRA8        | matrix-remodelling associated 8                                                                                | 0,6 | 0,2 | 0,77 |
| ENSRNOG00000004006 | NM_012699          | DNAJB9       | DnaJ (Hsp40) homolog, subfamily B, member 9                                                                    | 0,6 | 0,3 | 1,02 |
| ENSRNOG00000017437 | XM_003751278.1     | LOC100359583 | PREDICTED: Rattus norvegicus hypothetical protein LOC100359583 (LOC100359583)                                  | 0,6 | 0,2 | 0,77 |
| ENSRNOG00000026293 | NM_021835          | JUN          | Jun oncogene                                                                                                   | 0,6 | 0,5 | 2,43 |
| ENSRNOG00000017090 | XM_214649          | nd           | similar to RIKEN cDNA 4921524J17                                                                               | 0,6 | 0,3 | 0,77 |
| ENSRNOG00000015107 | XM_343326          | MLL2         | myeloid/lymphoid or mixed-lineage leukemia 2                                                                   | 0,6 | 0,4 | 1,47 |
| ENSRNOG00000024713 | ENSRNOG00000024713 | nd           | similar to 60S ribosomal protein L7a                                                                           | 0,6 | 0,0 | 0,00 |
| ENSRNOG00000010222 | NM_012570          | GLUD1        | glutamate dehydrogenase 1                                                                                      | 0,6 | 0,3 | 1,02 |
| ENSRNOG00000007700 | NM_022614          | INHBC        | inhibin beta C                                                                                                 | 0,6 | 0,2 | 0,33 |
| ENSRNOG00000026503 | XM_344923          | XRRRA1       | X-ray radiation resistance associated 1                                                                        | 0,6 | 0,4 | 1,63 |
| ENSRNOG00000020347 | NM_031074.2        | Nup98        | nucleoporin 98kDa                                                                                              | 0,6 | 0,2 | 0,77 |
| ENSRNOG00000012443 | NM_012930          | CPT-2        | carnitine palmitoyltransferase 2                                                                               | 0,6 | 0,3 | 1,47 |
| ENSRNOG00000017158 | XM_341907          | Q5BJU2       | eukaryotic translation initiation factor 4, gamma 2 (predicted)                                                | 0,6 | 0,3 | 1,02 |
| ENSRNOG00000020601 | XM_343153          | HMG20B       | high mobility group 20 B (predicted)                                                                           | 0,6 | 0,5 | 2,43 |
| ENSRNOG00000004459 | XM_343224          | SDRO         | orphan short-chain dehydrogenase / reductase                                                                   | 0,6 | 0,3 | 0,77 |
| ENSRNOG00000011052 | XM_216152          | garS         | glycyl-tRNA synthetase                                                                                         | 0,6 | 0,2 | 0,77 |
| ENSRNOG00000021033 | NM_001012001       | Lrrc2        | leucine rich repeat containing 2 (predicted)                                                                   | 0,6 | 0,4 | 2,15 |

|                    |                     |              |                                                                                                  |      |     |      |
|--------------------|---------------------|--------------|--------------------------------------------------------------------------------------------------|------|-----|------|
| ENSRNOG00000028038 | NM_032062           | nd           | huntingtin-associated protein interacting protein (duo)                                          | 0,6  | 0,3 | 1,02 |
| ENSRNOG00000025099 | XM_215047           | nd           | similar to hypothetical protein FLJ21816 (predicted)                                             | 0,6  | 0,2 | 0,33 |
| ENSRNOG00000026650 | Rn.81627            | TMPRSS4      | similar to transmembrane protease, serine 4; transmembrane protease, serine 4                    | 0,6  | 0,3 | 1,04 |
| ENSRNOG00000010543 | NM_001034150.1      | Srpr         | signal recognition particle receptor ('docking protein')                                         | 0,6  | 0,2 | 0,77 |
| ENSRNOG00000000165 | NM_012621           | Pfkfb01      | 6-phosphofructo-2-kinase/fructose-2,6-biphosphatase 1                                            | 0,6  | 0,3 | 1,29 |
| ENSRNOG00000019968 | XM_217908           | TRIM8        | tripartite motif-containing 8                                                                    | 0,6  | 0,1 | 0,00 |
| ENSRNOG00000012141 | XM_234553           | Xrcc3        | X-ray repair complementing defective repair in Chinese hamster cells 3 (predicted)               | 0,6  | 0,3 | 1,29 |
| ENSRNOG00000007797 | XM_232595           | RBPSUH       | recombination signal binding protein for immunoglobulin kappa J region                           | 0,6  | 0,3 | 1,47 |
| ENSRNOG00000016987 | NM_001271281.1      | Pstpip2      | proline-serine-threonine phosphatase-interacting protein 2                                       | 0,6  | 0,2 | 0,77 |
| ENSRNOG00000027618 | XR_146300.1         | RGD1565725   | PREDICTED: Rattus norvegicus similar to hypothetical protein FLJ23834 (RGD1565725)               | 0,6  | 0,5 | 3,11 |
| ENSRNOG00000014549 | XM_227201           | SGEF         | Src homology 3 domain-containing guanine nucleotide exchange factor                              | 0,6  | 0,1 | 0,33 |
| ENSRNOG00000018761 | XM_215080           | eif3c        | eukaryotic translation initiation factor 3, subunit C                                            | 0,6  | 0,4 | 2,07 |
| ENSRNOG00000027791 | XM_003751367.1      | Cox7a2l2     | cytochrome c oxidase, subunit 7la 2; similar to cytochrome c oxidase, subunit 7a 3               | 0,6  | 0,2 | 0,71 |
| ENSRNOG00000020060 | NM_172336           | ATF5         | activating transcription factor 5                                                                | 0,6  | 0,4 | 2,15 |
| ENSRNOG00000022138 | NM_024351           | Hspa8        | heat shock protein 8                                                                             | 0,6  | 0,4 | 2,07 |
| ENSRNOG00000009505 | XM_342935           | CD164L2      | CD164 sialomucin-like 2                                                                          | 0,6  | 0,6 | 3,11 |
| ENSRNOG00000010496 | XM_217086           | MED17        | mediator complex subunit 17                                                                      | 0,6  | 0,2 | 0,77 |
| ENSRNOG00000018131 | XM_215673           | Slc16A4      | solute carrier family 16, member 4 (monocarboxylic acid transporter 5)                           | 0,6  | 0,2 | 0,77 |
| ENSRNOG00000018649 | XM_230856           | Slc35C2      | solute carrier family 35, member C2                                                              | 0,6  | 0,3 | 1,47 |
| ENSRNOG00000006302 | NM_012815           | GCLC         | glutamate-cysteine ligase, catalytic subunit                                                     | 0,6  | 0,4 | 2,15 |
| ENSRNOG00000027367 | XM_225091           | nd           | similar to testicular serine protease 1                                                          | 0,6  | 0,3 | 1,29 |
| ENSRNOG00000025459 | XM_216910           | MARS         | methionine-tRNA synthetase (predicted)                                                           | 0,6  | 0,2 | 0,77 |
| ENSRNOG00000014948 | NM_138504           | OSGIN1       | oxidative stress induced growth inhibitor 1                                                      | 0,6  | 0,4 | 2,07 |
| ENSRNOG00000018402 | NM_001085352.1      | ApoC2        | apolipoprotein C-II                                                                              | 0,6  | 0,2 | 0,77 |
| ENSRNOG00000009754 | NM_177928           | PBEF1        | nicotinamide phosphoribosyltransferase                                                           | 0,6  | 0,2 | 0,77 |
| ENSRNOG00000008642 | NM_001012012        | SNX11        | sorting nexin 11                                                                                 | 0,6  | 0,3 | 1,47 |
| Down-regulated     |                     |              |                                                                                                  |      |     |      |
| ENSRNOG00000027498 | XM_221141           | ENGASE       | endo-beta-N-acetylglucosaminidase                                                                | -0,6 | 0,3 | 2,07 |
| ENSRNOG00000010658 | NM_017074           | CTH          | cystathionase (cystathionine gamma-lyase)                                                        | -0,6 | 0,3 | 1,63 |
| ENSRNOG00000012442 | XM_218855           | nd           | similar to transmembrane protein 2                                                               | -0,6 | 0,3 | 1,47 |
| ENSRNOG00000016895 | XM_217314           | nd           | similar to RIKEN cDNA 2310045B01                                                                 | -0,6 | 0,5 | 4,33 |
| ENSRNOG00000018494 | NM_001012072        | PPP1R3C      | protein phosphatase 1, regulatory (inhibitor) subunit 3C                                         | -0,6 | 0,3 | 2,15 |
| ENSRNOG00000003941 | NM_057114.1         | Prdx1        | peroxiredoxin 1 (Prdx1)                                                                          | -0,6 | 0,1 | 0,62 |
| ENSRNOG00000000386 | NM_138530           | PBLD         | phenazine biosynthesis-like protein domain containing                                            | -0,6 | 0,1 | 0,48 |
| ENSRNOG00000003723 | NM_001109081.1      | Wdr26        | WD repeat domain 26                                                                              | -0,6 | 0,2 | 0,80 |
| ENSRNOG00000008755 | NM_017340           | ACOX1        | acyl-Coenzyme A oxidase 1, palmitoyl                                                             | -0,6 | 0,3 | 2,15 |
| ENSRNOG00000013945 | NM_178094           | Itpkc        | inositol 1,4,5-trisphosphate 3-kinase C                                                          | -0,6 | 0,1 | 0,48 |
| ENSRNOG00000003677 | ENSRNOG00000003677  | nd           | AJ18 PROTEIN                                                                                     | -0,6 | 0,4 | 2,76 |
| ENSRNOG00000002210 | NM_001004209        | HSD17B11     | hydroxysteroid (17-beta) dehydrogenase 11                                                        | -0,6 | 0,3 | 2,07 |
| ENSRNOG00000027489 | ENSRNOG000000027489 | Mn1          | meningioma 1                                                                                     | -0,6 | 0,4 | 3,11 |
| ENSRNOG00000016484 | NM_181371           | GSTK1        | glutathione S-transferase kappa 1                                                                | -0,6 | 0,3 | 1,47 |
| ENSRNOG00000020457 | NM_001004418        | TACC2        | transforming, acidic coiled-coil containing protein 2                                            | -0,6 | 0,2 | 0,80 |
| ENSRNOG00000013765 | NM_001000689        | Olr34        | olfactory receptor gene Olr34                                                                    | -0,6 | 0,3 | 2,07 |
| ENSRNOG00000009740 | Rn.45744            | Oatp14       | solute carrier organic anion transporter family, member 1c1                                      | -0,6 | 0,4 | 2,76 |
| ENSRNOG00000021314 | NM_019238           | FDFT1        | farnesyl diphosphate farnesyl transferase 1                                                      | -0,6 | 0,4 | 2,76 |
| ENSRNOG00000003443 | XM_222473           | Klf1         | Kruppel-like factor 1 (erythroid)                                                                | -0,6 | 0,4 | 2,76 |
| ENSRNOG00000014515 | XM_227618           | CDC14A       | CDC14 cell division cycle 14 homolog A (S. cerevisiae)                                           | -0,6 | 0,2 | 0,80 |
| ENSRNOG00000027853 | XM_344598           | nd           | histone H4                                                                                       | -0,6 | 0,2 | 1,02 |
| ENSRNOG00000000312 | Rn.11982            | FIG4         | FIG4 homolog (S. cerevisiae)                                                                     | -0,6 | 0,4 | 2,76 |
| ENSRNOG00000004302 | NM_012619           | Pah          | phenylalanine hydroxylase                                                                        | -0,6 | 0,3 | 2,07 |
| ENSRNOG00000001396 | XM_213738           | MOSPD3       | motile sperm domain containing 3                                                                 | -0,6 | 0,2 | 1,04 |
| ENSRNOG00000003469 | NM_181089           | MAST1        | microtubule associated serine/threonine kinase 1                                                 | -0,6 | 0,3 | 1,47 |
| ENSRNOG00000000701 | Rn.121              | ISCU         | iron-sulfur cluster scaffold homolog (E. coli)                                                   | -0,6 | 0,3 | 1,63 |
| ENSRNOG00000017593 | NM_030864           | MTR          | 5-methyltetrahydrofolate-homocysteine methyltransferase                                          | -0,6 | 0,2 | 0,80 |
| ENSRNOG00000016099 | NM_175582           | Idb4         | inhibitor of DNA binding 4                                                                       | -0,6 | 0,3 | 2,07 |
| ENSRNOG00000027192 | NM_001012346        | nd           | similar to hypothetical protein FLJ14675 (predicted)                                             | -0,6 | 0,1 | 0,62 |
| ENSRNOG00000016526 | XM_226112           | DSG2         | desmoglein 2                                                                                     | -0,6 | 0,4 | 2,07 |
| ENSRNOG00000013956 | NM_134467           | Rnf38        | ring finger protein 38                                                                           | -0,6 | 0,4 | 2,76 |
| ENSRNOG00000002265 | NM_016996           | CASR         | calcium-sensing receptor                                                                         | -0,6 | 0,3 | 2,07 |
| ENSRNOG00000023142 | XM_223474           | nd           | similar to aldehyde dehydrogenase family 9, subfamily A1; 4-trimethylaminobutyraldehyde dehydrog | -0,6 | 0,1 | 0,48 |
| ENSRNOG00000020950 | Rn.162486           | SYVN1        | synovial apoptosis inhibitor 1, synoviolin                                                       | -0,6 | 0,2 | 0,71 |
| ENSRNOG00000000414 | NM_001177829.1      | LOC100365935 | rCG22129-like (LOC100365935)                                                                     | -0,6 | 0,2 | 1,02 |
| ENSRNOG00000017056 | XM_001071565.3      | LOC684681    | uncharacterized LOC684681 (LOC684681)                                                            | -0,6 | 0,5 | 3,69 |
| ENSRNOG00000013291 | NM_031839           | Cyp2c23      | cytochrome P450 2C23                                                                             | -0,6 | 0,4 | 2,07 |
| ENSRNOG00000021200 | NM_001012080        | HFE2         | hemochromatosis type 2 (juvenile) (human homolog)                                                | -0,6 | 0,1 | 0,48 |
| ENSRNOG00000014490 | XM_215705           | BDH2         | 3-hydroxybutyrate dehydrogenase, type 2                                                          | -0,6 | 0,1 | 0,48 |
| ENSRNOG00000009928 | XM_343439           | BCKDHB       | branched chain keto acid dehydrogenase E1, beta polypeptide                                      | -0,6 | 0,2 | 0,78 |
| ENSRNOG00000014739 | NM_173109           | Wfdc2        | WAP four-disulfide core domain 2                                                                 | -0,7 | 0,1 | 0,64 |
| ENSRNOG00000002951 | XM_228779           | CCNB3        | similar to cyclin B3                                                                             | -0,7 | 0,5 | 2,76 |
| ENSRNOG00000005479 | NM_017215           | Slc1A2       | solute carrier family 1 (glial high affinity glutamate transporter), member 2                    | -0,7 | 0,3 | 1,04 |
| ENSRNOG00000000661 | XM_222245           | HPS4         | Hermansky-Pudlak syndrome 4 homolog (human)                                                      | -0,7 | 0,3 | 1,29 |
| ENSRNOG00000023060 | XM_227742           | nd           | similar to 60S RIBOSOMAL PROTEIN L29 (P23)                                                       | -0,7 | 0,0 | 0,00 |
| ENSRNOG00000001261 | NM_053567           | FTCD         | formiminotransferase cyclodeaminase                                                              | -0,7 | 0,4 | 2,43 |
| ENSRNOG00000017188 | NM_178847           | Cyp27a1      | cytochrome P450 27A1                                                                             | -0,7 | 0,3 | 1,04 |
| ENSRNOG00000020992 | NM_080892           | SELENBP1     | selenium binding protein 1                                                                       | -0,7 | 0,2 | 0,75 |
| ENSRNOG00000014560 | NM_030826.3         | Gpx1         | glutathione peroxidase 1 (Gpx1)                                                                  | -0,7 | 0,4 | 2,07 |
| ENSRNOG00000012391 | XM_575155.5         | Ttn          | titin (Ttn)                                                                                      | -0,7 | 0,3 | 1,29 |
| ENSRNOG00000027249 | XM_223701           | FANCL        | Fanconi anemia, complementation group L                                                          | -0,7 | 0,3 | 1,02 |
| ENSRNOG00000004147 | XM_221100           | ABCA8a       | ATP-binding cassette, sub-family A (ABC1), member 8a                                             | -0,7 | 0,3 | 1,04 |
| ENSRNOG00000027129 | NM_001109356.1      | Sdr16c6      | short chain dehydrogenase/reductase family 16C, member 6 (Sdr16c6)                               | -0,7 | 0,4 | 2,07 |
| ENSRNOG00000013304 | NM_017134           | ARG1         | arginase, liver                                                                                  | -0,7 | 0,4 | 1,47 |
| ENSRNOG00000002013 | XM_221455           | SIDT1        | SID1 transmembrane family, member 1                                                              | -0,7 | 0,1 | 0,48 |
| ENSRNOG00000010922 | NM_001025418        | PPP2R1B      | protein phosphatase 2 (formerly 2A), regulatory subunit A (PR 65), beta isoform                  | -0,7 | 0,3 | 1,29 |
| ENSRNOG00000005220 | XM_216738           | SYNE2        | spectrin repeat containing, nuclear envelope 2                                                   | -0,7 | 0,2 | 0,80 |
| ENSRNOG00000024796 | Rn.162147           | LRRC47       | leucine rich repeat containing 47                                                                | -0,7 | 0,7 | 4,33 |
| ENSRNOG00000006472 | NM_021863           | HSPA2        | heat shock protein 2                                                                             | -0,7 | 0,5 | 2,43 |
| ENSRNOG00000007478 | NM_133405           | CRY2         | cryptochrome 2 (photolyase-like)                                                                 | -0,7 | 0,4 | 1,47 |

|                     |                    |              |                                                                                                  |      |     |      |
|---------------------|--------------------|--------------|--------------------------------------------------------------------------------------------------|------|-----|------|
| ENSRNOG00000020983  | XM_001078193.3     | LOC690930    | PREDICTED: Rattus norvegicus membrane-spanning 4-domains subfamily A member 6C-like, transc      | -0,7 | 0,3 | 1,02 |
| ENSRNOG00000023219  | NM_017218          | ErbB3        | v-erb-b2 erythroblastic leukemia viral oncogene homolog 3 (avian)                                | -0,7 | 0,2 | 0,71 |
| ENSRNOG00000016339  | NM_053768          | UOX          | urate oxidase                                                                                    | -0,7 | 0,3 | 1,29 |
| ENSRNOG00000023465  | ENSRNOG00000023465 | Depp         | similar to hypothetical protein MGC6835                                                          | -0,7 | 0,6 | 3,69 |
| ENSRNOG0000004644   | XM_228451          | nd           | similar to transcription factor znf6 - human                                                     | -0,7 | 0,6 | 3,69 |
| ENSRNOG00000016573  | NM_001012345       | DGAT2        | diacylglycerol O-acyltransferase homolog 2 (mouse)                                               | -0,7 | 0,1 | 0,00 |
| ENSRNOG00000021004  | ENSRNOG00000021004 | RASIP1       | Ras interacting protein 1                                                                        | -0,7 | 0,3 | 0,80 |
| ENSRNOG00000000933  | XM_221871          | nd           | similar to KIAA0774 protein                                                                      | -0,7 | 0,1 | 0,00 |
| ENSRNOG00000020924  | NM_001012070       | Ptgdr2       | G protein-coupled receptor 44 (predicted)                                                        | -0,7 | 0,1 | 0,48 |
| ENSRNOG00000019691  | NM_053425          | CCS          | copper chaperone for superoxide dismutase                                                        | -0,7 | 0,1 | 0,00 |
| ENSRNOG00000000903  | NM_031330          | ARLY         | argininosuccinate lyase                                                                          | -0,7 | 0,2 | 0,48 |
| ENSRNOG00000013704  | NM_017072.1        | Cps1         | carbamoyl-phosphate synthetase 1, mitochondrial                                                  | -0,7 | 0,1 | 0,00 |
| ENSRNOG00000017327  | XM_344625          | nd           | similar to Aldo-keto reductase family 1 member C3 (Trans-1,2-dihydrobenzene-1,2-diol dehydrogena | -0,7 | 0,2 | 0,48 |
| ENSRNOG00000019503  | NM_001011916       | Rec8         | REC8 homolog (yeast)                                                                             | -0,8 | 0,2 | 0,48 |
| ENSRNOG00000017808  | NM_053536          | KLF15        | Kruppel-like factor 15                                                                           | -0,8 | 0,1 | 0,00 |
| ENSRNOG00000014876  | XM_237521          | LPIN2        | lipin 2 (predicted)                                                                              | -0,8 | 0,2 | 0,62 |
| ENSRNOG00000017673  | NM_001191824.1     | Spata22      | spermatogenesis associated 22 (Spata22)                                                          | -0,8 | 0,3 | 0,80 |
| ENSRNOG00000004009  | NM_057155          | XPNPPE2      | X-prolyl aminopeptidase (aminopeptidase P) 2, membrane-bound                                     | -0,8 | 0,1 | 0,00 |
| ENSRNOG00000016349  | NM_017084          | GNMT         | glycine N-methyltransferase                                                                      | -0,8 | 0,4 | 1,29 |
| ENSRNOG00000014493  | XM_231193          | GOLGA1       | golgi autoantigen, golgin subfamily a, 1 (predicted)                                             | -0,8 | 0,3 | 0,78 |
| ENSRNOG00000012929  | XM_220736          | wsb1         | WD repeat and SOCS box-containing 1                                                              | -0,8 | 0,8 | 4,33 |
| ENSRNOG00000000302  | XM_215423          | sesn1        | sestrin 1                                                                                        | -0,8 | 0,2 | 0,48 |
| ENSRNOG00000022292  | NM_001014171.1     | Veph1        | ventricular zone expressed PH domain-containing 1 (Veph1)                                        | -0,8 | 0,2 | 0,48 |
| ENSRNOG00000006789  | NM_001109986.1     | Ddit3        | DNA-damage inducible transcript 3 (Ddit3), transcript variant 1                                  | -0,8 | 0,3 | 0,62 |
| ENSRNOG00000004679  | XM_229979          | fign         | fidgetin                                                                                         | -0,8 | 0,3 | 0,78 |
| ENSRNOG00000008498  | XM_216288          | GABARAPL1    | GABA(A) receptor-associated protein like 1                                                       | -0,8 | 0,3 | 0,71 |
| ENSRNOG00000009438  | NM_133617          | SERPINA6     | serine (or cysteine) peptidase inhibitor, clade A, member 6                                      | -0,8 | 0,3 | 0,97 |
| ENSRNOG00000006653  | NM_130748          | Slc38A4      | solute carrier family 38, member 4                                                               | -0,8 | 0,3 | 0,48 |
| ENSRNOG00000028199  | NM_001001101       | Olr1530      | olfactory receptor (fragmente)                                                                   | -0,8 | 0,8 | 4,33 |
| ENSRNOG00000001496  | XM_341791          | nd           | similar to Alcohol sulfotransferase (Hydroxysteroid sulfotransferase) (ST) (ST-60)               | -0,8 | 0,7 | 2,76 |
| ENSRNOG00000003370  | NM_013078          | OTC          | ornithine carbamoyltransferase                                                                   | -0,8 | 0,3 | 0,48 |
| ENSRNOG00000016807  | NM_022521          | OAT          | ornithine aminotransferase (gyrate atrophy)                                                      | -0,8 | 0,4 | 1,02 |
| ENSRNOG00000013484  | NM_031509          | GSTA3        | glutathione S-transferase A3                                                                     | -0,8 | 0,3 | 0,77 |
| ENSRNOG00000012123  | NM_017126          | FDX1         | ferredoxin 1                                                                                     | -0,9 | 0,2 | 0,00 |
| ENSRNOG00000001827  | NM_022257          | MASP1        | mannan-binding lectin serine peptidase 1                                                         | -0,9 | 0,3 | 0,48 |
| ENSRNOG00000012811  | Rn.44189           | SPINT1       | serine peptidase inhibitor, Kunitz type 1                                                        | -0,9 | 0,2 | 0,00 |
| ENSRNOG00000005905  | NM_017031          | PDE4B        | phosphodiesterase 4B, cAMP specific                                                              | -0,9 | 0,4 | 0,78 |
| ENSRNOG00000017672  | NM_138547          | Akr1c14      | aldo-keto reductase family 1, member C14                                                         | -0,9 | 0,2 | 0,00 |
| ENSRNOG00000020928  | NM_019303          | Cyp2a1       | cytochrome P450 IIA1 (hepatic steroid hydroxylase IIA1) gene                                     | -0,9 | 0,4 | 0,59 |
| ENSRNOG00000000961  | XM_222147          | GLT1D1       | similar to RIKEN cDNA 5730455A04 gene (predicted)                                                | -0,9 | 0,3 | 0,48 |
| ENSRNOG00000001983  | XM_223299          | nd           | UDP-glucuronosyltransferase 2B3 precursor, microsomal (UDPGT) (testosterone, DHT, beta-estradi   | -0,9 | 0,3 | 0,48 |
| ENSRNOG00000028616  | NM_198780          | PEPCK        | phosphoenolpyruvate carboxykinase 1 (soluble)                                                    | -0,9 | 0,9 | 3,69 |
| ENSRNOG00000027313  | NM_001013181       | Zbtb16       | zinc finger protein 145                                                                          | -0,9 | 0,4 | 0,78 |
| ENSRNOG00000015660  | NM_031350          | pex3         | peroxisomal biogenesis factor 3                                                                  | -1,0 | 0,3 | 0,48 |
| ENSRNOG00000007886  | NM_053288          | ORM          | orosomuroid 1                                                                                    | -1,0 | 0,4 | 0,71 |
| ENSRNOG000000019924 | NM_172075          | THOP1        | thimet oligopeptidase 1                                                                          | -1,0 | 0,7 | 2,07 |
| ENSRNOG000000008781 | NM_001106749.1     | RGD1310769   | similar to HSPC288 (RGD1310769)                                                                  | -1,0 | 0,1 | 0,00 |
| ENSRNOG00000011612  | NM_022403          | TDO2         | tryptophan 2,3-dioxygenase                                                                       | -1,0 | 0,1 | 0,00 |
| ENSRNOG00000011351  | NM_012860          | AdoMet       | methionine adenosyltransferase I, alpha                                                          | -1,0 | 0,3 | 0,48 |
| ENSRNOG00000016841  | XM_226351          | ALT2         | glutamic pyruvate transaminase (alanine aminotransferase) 2                                      | -1,0 | 0,2 | 0,00 |
| ENSRNOG00000013728  | XM_221047          | POLG2        | polymerase (DNA directed), gamma 2, accessory subunit                                            | -1,0 | 0,1 | 0,00 |
| ENSRNOG00000005341  | XM_229938          | UPP2         | uridine phosphorylase 2                                                                          | -1,0 | 0,3 | 0,00 |
| ENSRNOG00000012464  | NM_019286          | Adh1         | alcohol dehydrogenase 1 (class I)                                                                | -1,0 | 0,6 | 1,51 |
| ENSRNOG000000002597 | NM_173305          | Hsd17b6      | hydroxysteroid (17-beta) dehydrogenase 6                                                         | -1,0 | 0,4 | 0,48 |
| ENSRNOG00000011200  | NM_030850          | BHMT         | betaine-homocysteine methyltransferase                                                           | -1,0 | 0,7 | 1,63 |
| ENSRNOG00000004821  | XM_235312          | SNTB1        | syntrophin, basic 1                                                                              | -1,1 | 0,3 | 0,00 |
| ENSRNOG00000013302  | NM_001009920       | GST YC2      | glutathione S-transferase YC-2 (chain 2) (GST YC2)                                               | -1,1 | 0,4 | 0,48 |
| ENSRNOG00000017236  | XM_225538          | 3-alpha-Hsd3 | similar to Aldo-keto reductase family 1 member C2 (Trans-1,2-dihydrobenzene-1,2-diol dehydrogena | -1,1 | 0,8 | 1,47 |
| ENSRNOG00000011016  | Rn.48707           | Slc7A2       | solute carrier family 7 (cationic amino acid transporter, y+ system), member 2                   | -1,1 | 0,3 | 0,24 |
| ENSRNOG00000006893  | XM_231833          | PPM1K        | protein phosphatase 1K (PP2C domain containing)                                                  | -1,2 | 0,5 | 0,48 |
| ENSRNOG00000001388  | NM_053962          | sdh          | serine dehydratase                                                                               | -1,2 | 0,8 | 1,15 |
| ENSRNOG00000014726  | Rn.162462          | ACSM4        | acyl-CoA synthetase medium-chain family member 4                                                 | -1,2 | 0,3 | 0,00 |
| ENSRNOG00000015740  | XM_341581          | RNF125       | ring finger protein 125                                                                          | -1,2 | 0,3 | 0,00 |
| ENSRNOG00000000768  | NM_053299          | UBD          | ubiquitin D                                                                                      | -1,2 | 0,4 | 0,00 |
| ENSRNOG00000014990  | NM_012695.3        | Sult2a6      | sulfotransferase family 2A, dehydroepiandrosterone (DHEA)-preferring, member 6 (Sult2a6)         | -1,2 | 0,6 | 0,48 |
| ENSRNOG00000019982  | XM_214838          | ETHE1        | ethylmalonic encephalopathy 1                                                                    | -1,3 | 0,8 | 1,02 |
| ENSRNOG00000026722  | NM_001025131.1     | Sult2a2      | sulfotransferase family 2A, dehydroepiandrosterone (DHEA)-preferring, member 2 (Sult2a2)         | -1,3 | 0,6 | 0,48 |
| ENSRNOG000000008837 | NM_013157          | Ass1         | argininosuccinate synthetase 1                                                                   | -1,3 | 0,4 | 0,00 |
| ENSRNOG00000012787  | XM_346288          | Tmem164      | transmembrane protein 164                                                                        | -1,3 | 0,5 | 0,00 |
| ENSRNOG00000017619  | NM_022407          | Aldh         | aldehyde dehydrogenase 1 family, member A1                                                       | -1,4 | 0,4 | 0,24 |
| ENSRNOG00000019481  | NM_031241          | Cyp8b1       | cytochrome P450, family 8, subfamily b, polypeptide 1                                            | -1,4 | 0,3 | 0,00 |
| ENSRNOG00000013464  | NM_012674.2        | Spink3       | serine peptidase inhibitor, Kazal type 3 (Spink3)                                                | -1,4 | 0,5 | 0,00 |
| ENSRNOG00000007507  | XM_231524          | Aass         | aminoadipate-semialdehyde synthase (Aass), nuclear gene encoding mitochondrial protein           | -1,5 | 0,1 | 0,00 |
| ENSRNOG00000013410  | NM_152936.1        | Spink        | serine peptidase inhibitor, Kazal type 1 (Spink1)                                                | -1,6 | 0,6 | 0,00 |

**Table S3. Hepatic genes regulated by GH in hypothyroid-orchidectomized rats.** The administrations of vehicle (TXOX) or GH (TXOXGH) to TXOX rats were described in Material and Methods. Then, differently expressed genes in the livers were identified by DNA microarrays. The analysis is based on the SAM statistical technique and differentially-expressed genes were discovered using a FDR less than 5% and a mean ratio of log2 > |0.58|. The table shows ENSEMBL gene ID, gene symbol, gene description, R (TXOXGH/TXOX), SD, and q(%).
